# Supplementary material for: InCl3-mediated eco-friendly three-component domino reaction for synthesis of highly functionalized triazolylspiroxindolinopyrans and triazolylpyrans under solvent-free conditions
Source: Royal Society of Chemistry journal article supplement (doi:10.1039/c4ra01524j), 2014-01-01

## **InCl<sub>3</sub>-mediated eco-friendly three-component domino reaction for synthesis of highly functionalized triazolylspiroxindolinopyrans and triazolylpyrans under solvent free condition**

Jayabal Kamalraja<sup>a</sup>, Potharaj Murugasan<sup>a</sup>, Paramasivan Thirumalai Perumal<sup>\*a</sup>

\* Organic Chemistry Division, CSIR-Central Leather Research Institute, Adyar, Chennai, 600020, Tamilnadu, India. Fax: +91. 44. 24911589, Tel: +91. 44. 24437130, E-mail; [ptperumal@gmail.com](mailto:ptperumal@gmail.com).

### **Supporting Information**

| <b>INDEX:</b>                                         | <b>Page No.</b> |
|-------------------------------------------------------|-----------------|
| <b><sup>1</sup>H &amp; <sup>13</sup>C NMR Spectra</b> | <b>S2-S38</b>   |

# $^1\text{H}$ and $^{13}\text{C}$ NMR Spectra of Compound 5a

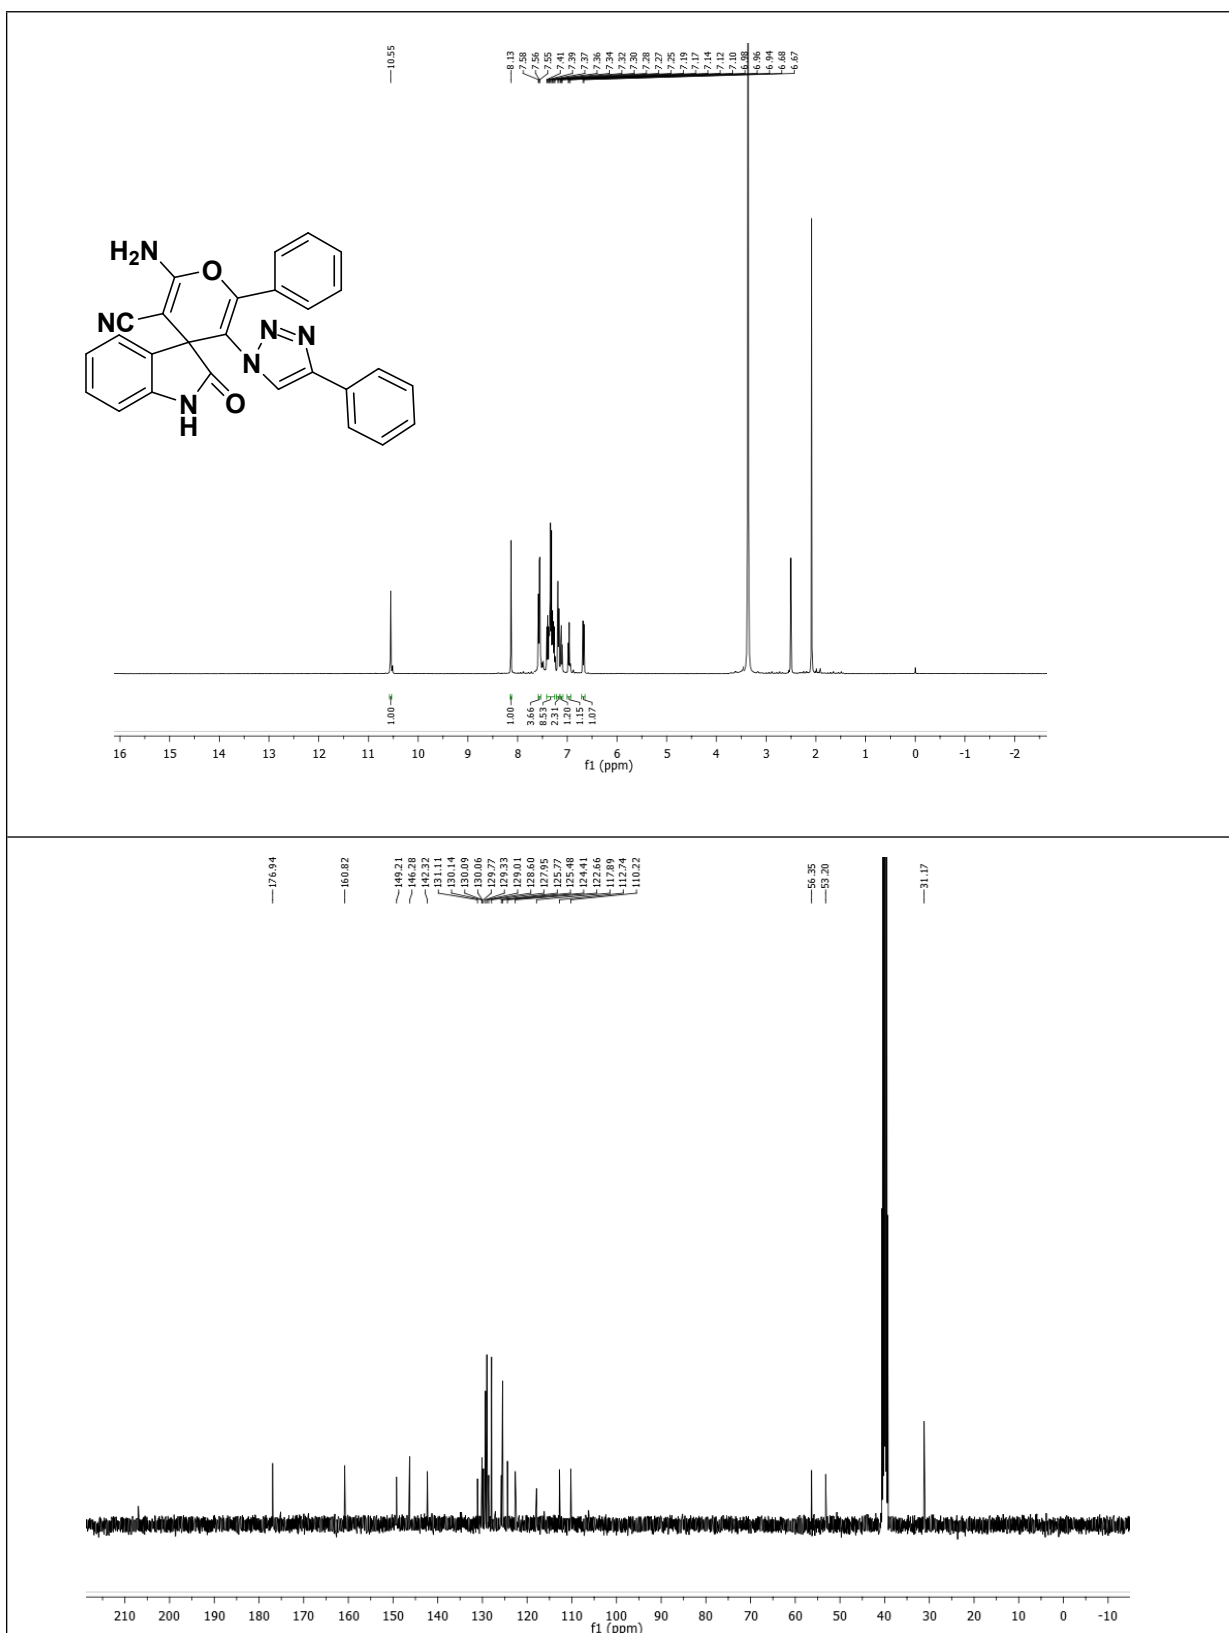

# $^1\text{H}$ and $^{13}\text{C}$ NMR Spectra of Compound 5b

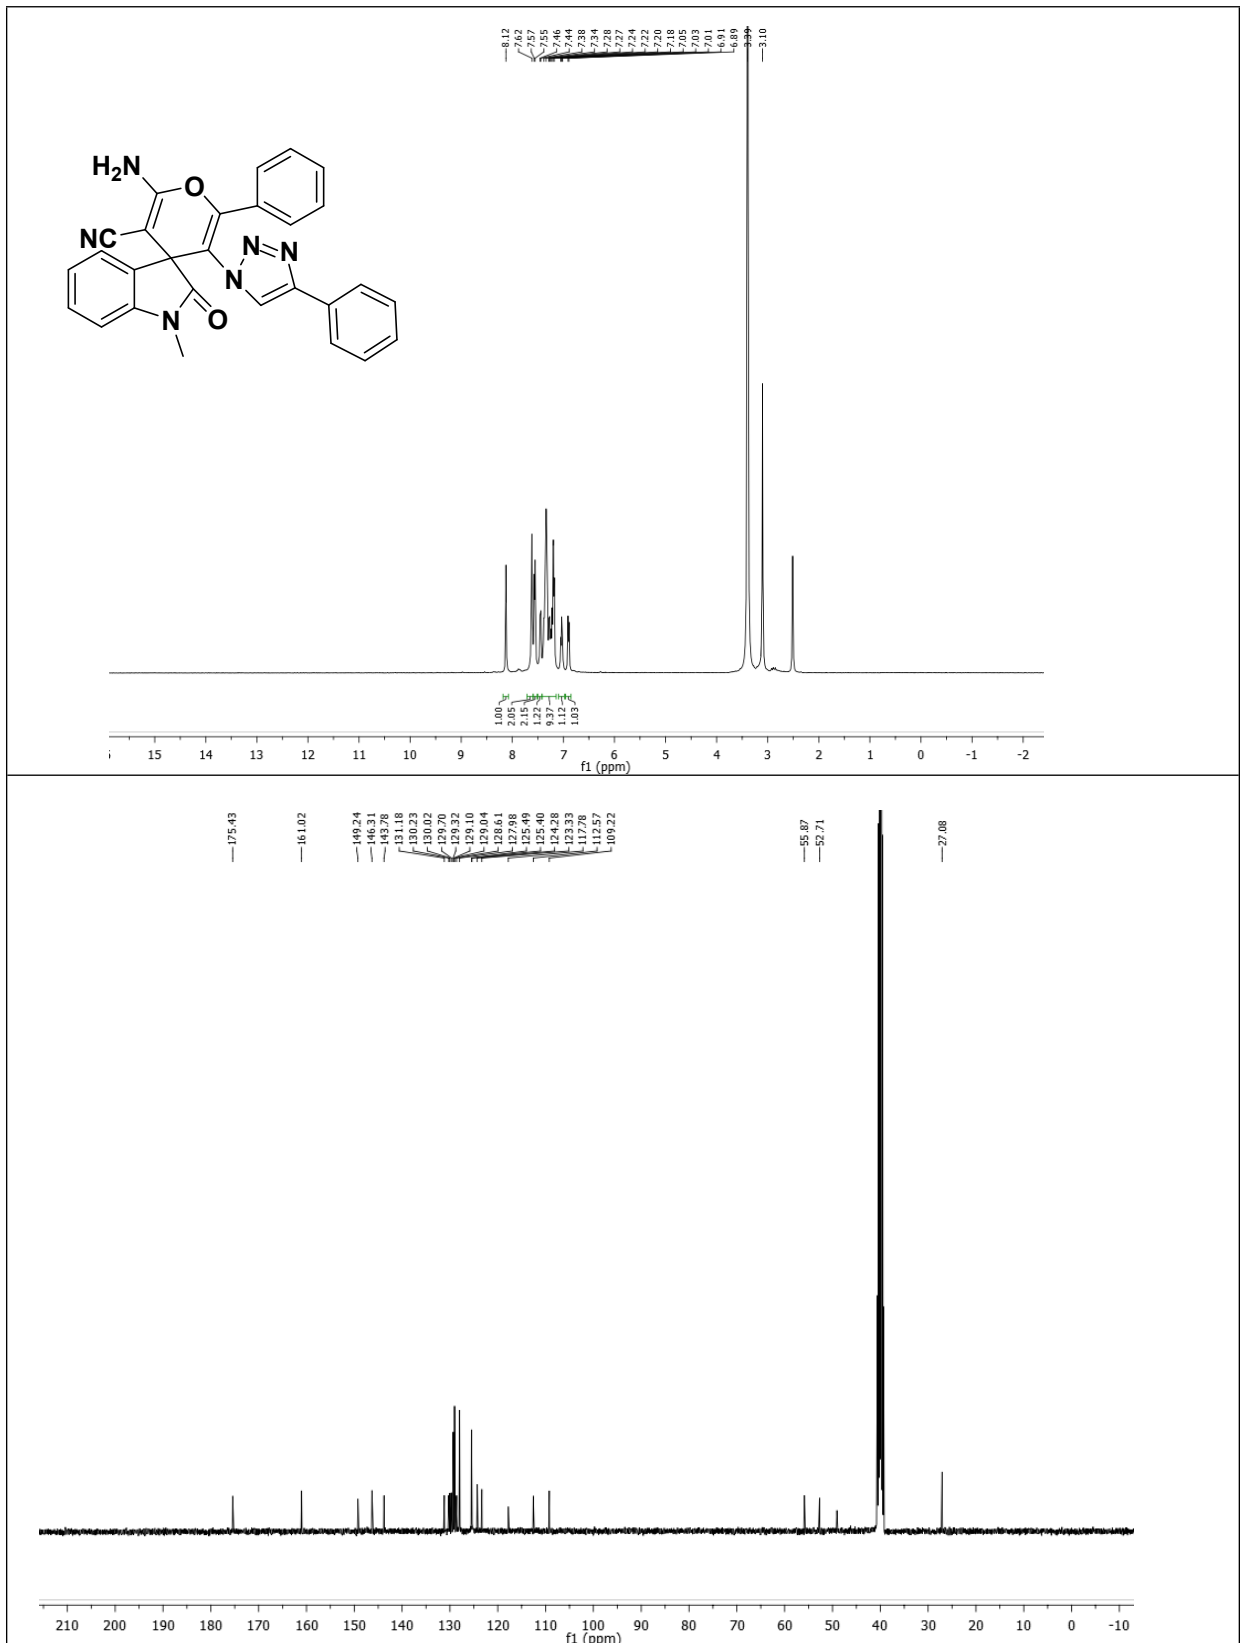

# <sup>1</sup>H and <sup>13</sup>C NMR Spectra of Compound 5c

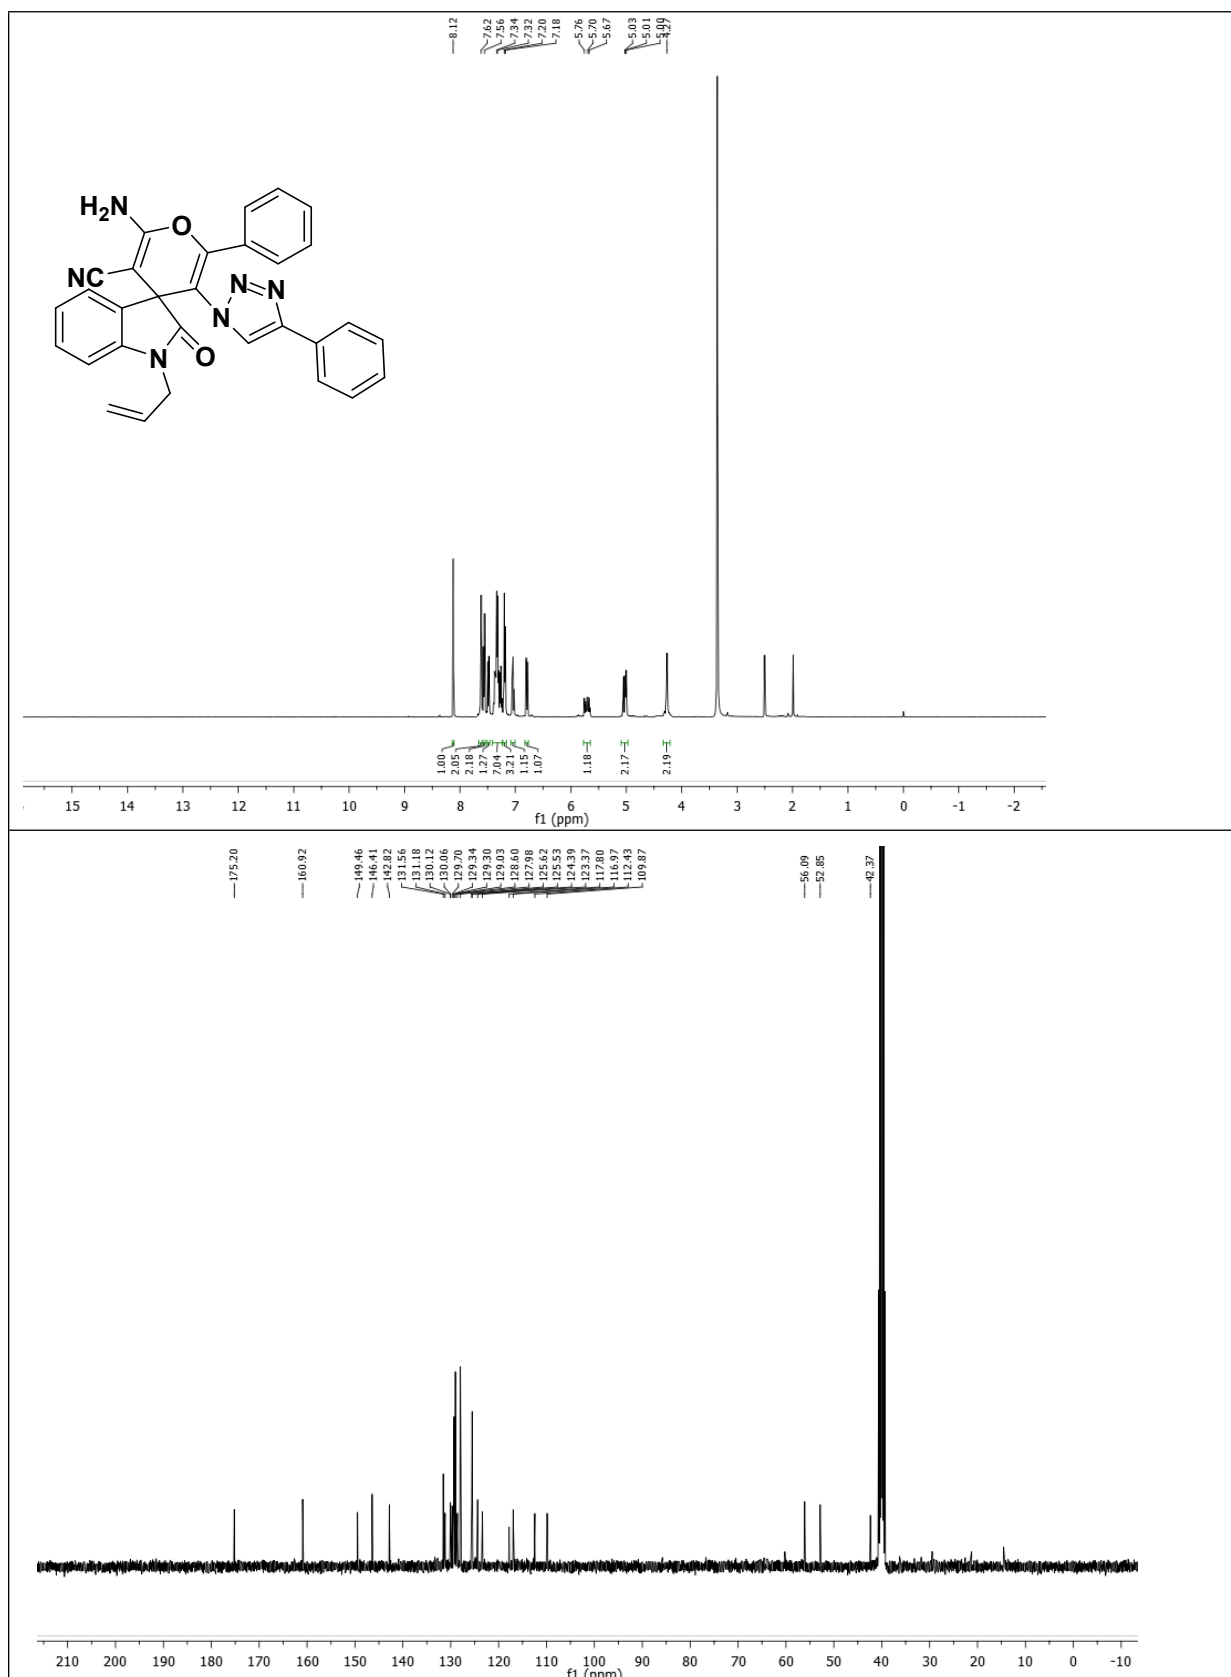

# <sup>1</sup>H and <sup>13</sup>C NMR Spectra of Compound 5d

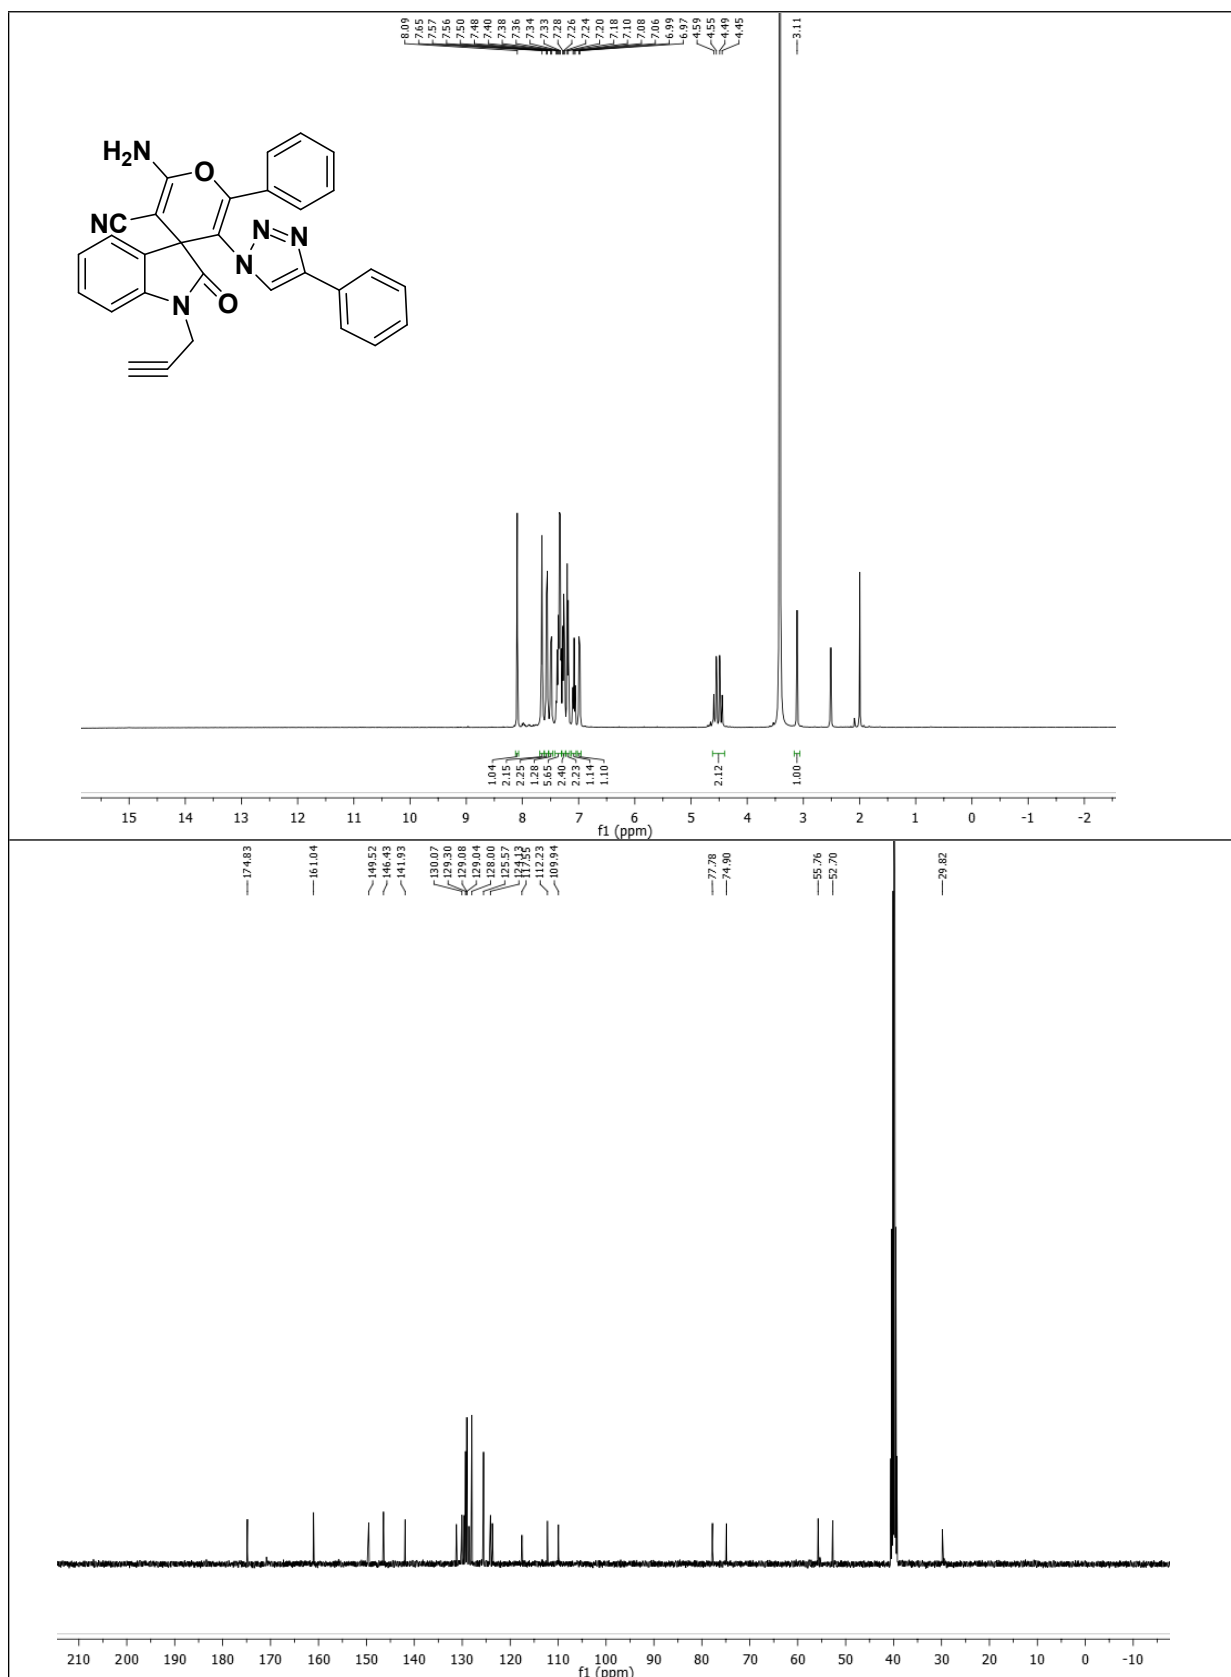

# <sup>1</sup>H and <sup>13</sup>C NMR Spectra of Compound 5e

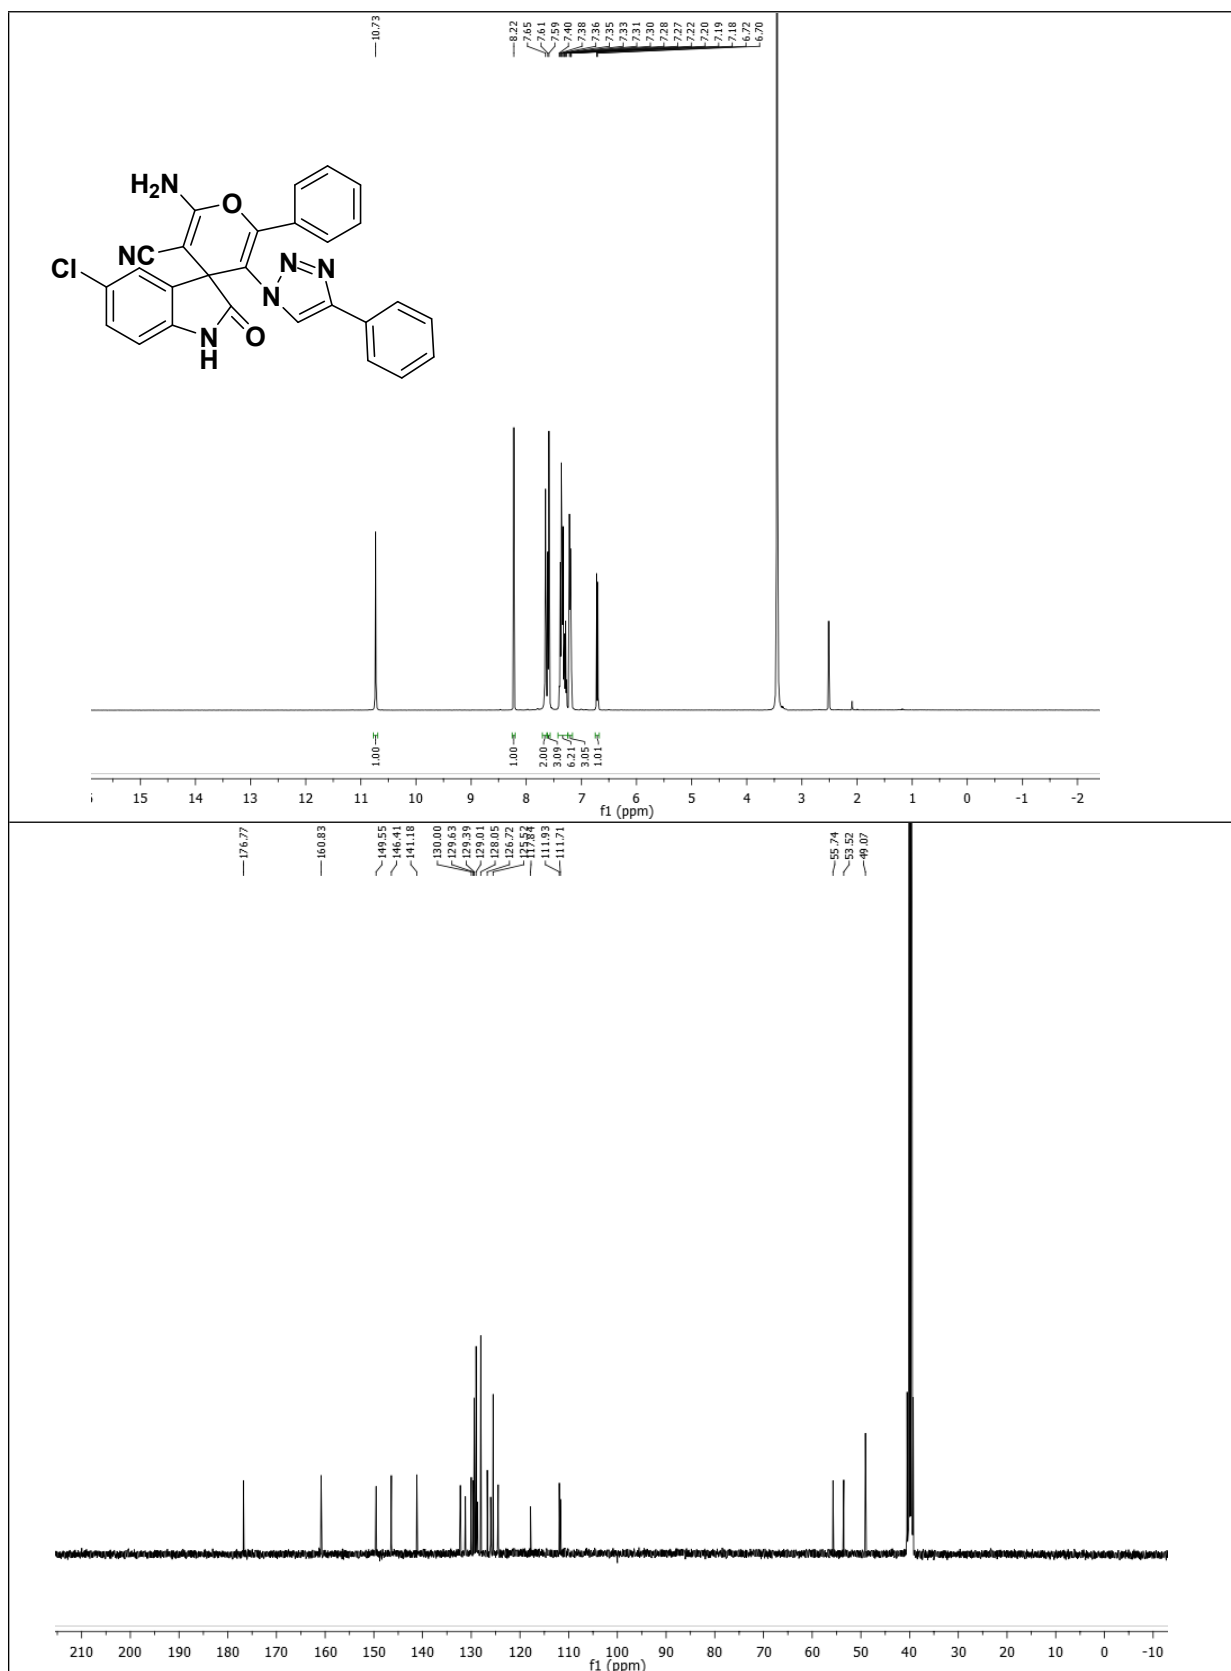

# $^1\text{H}$ and $^{13}\text{C}$ NMR Spectra of Compound 5f

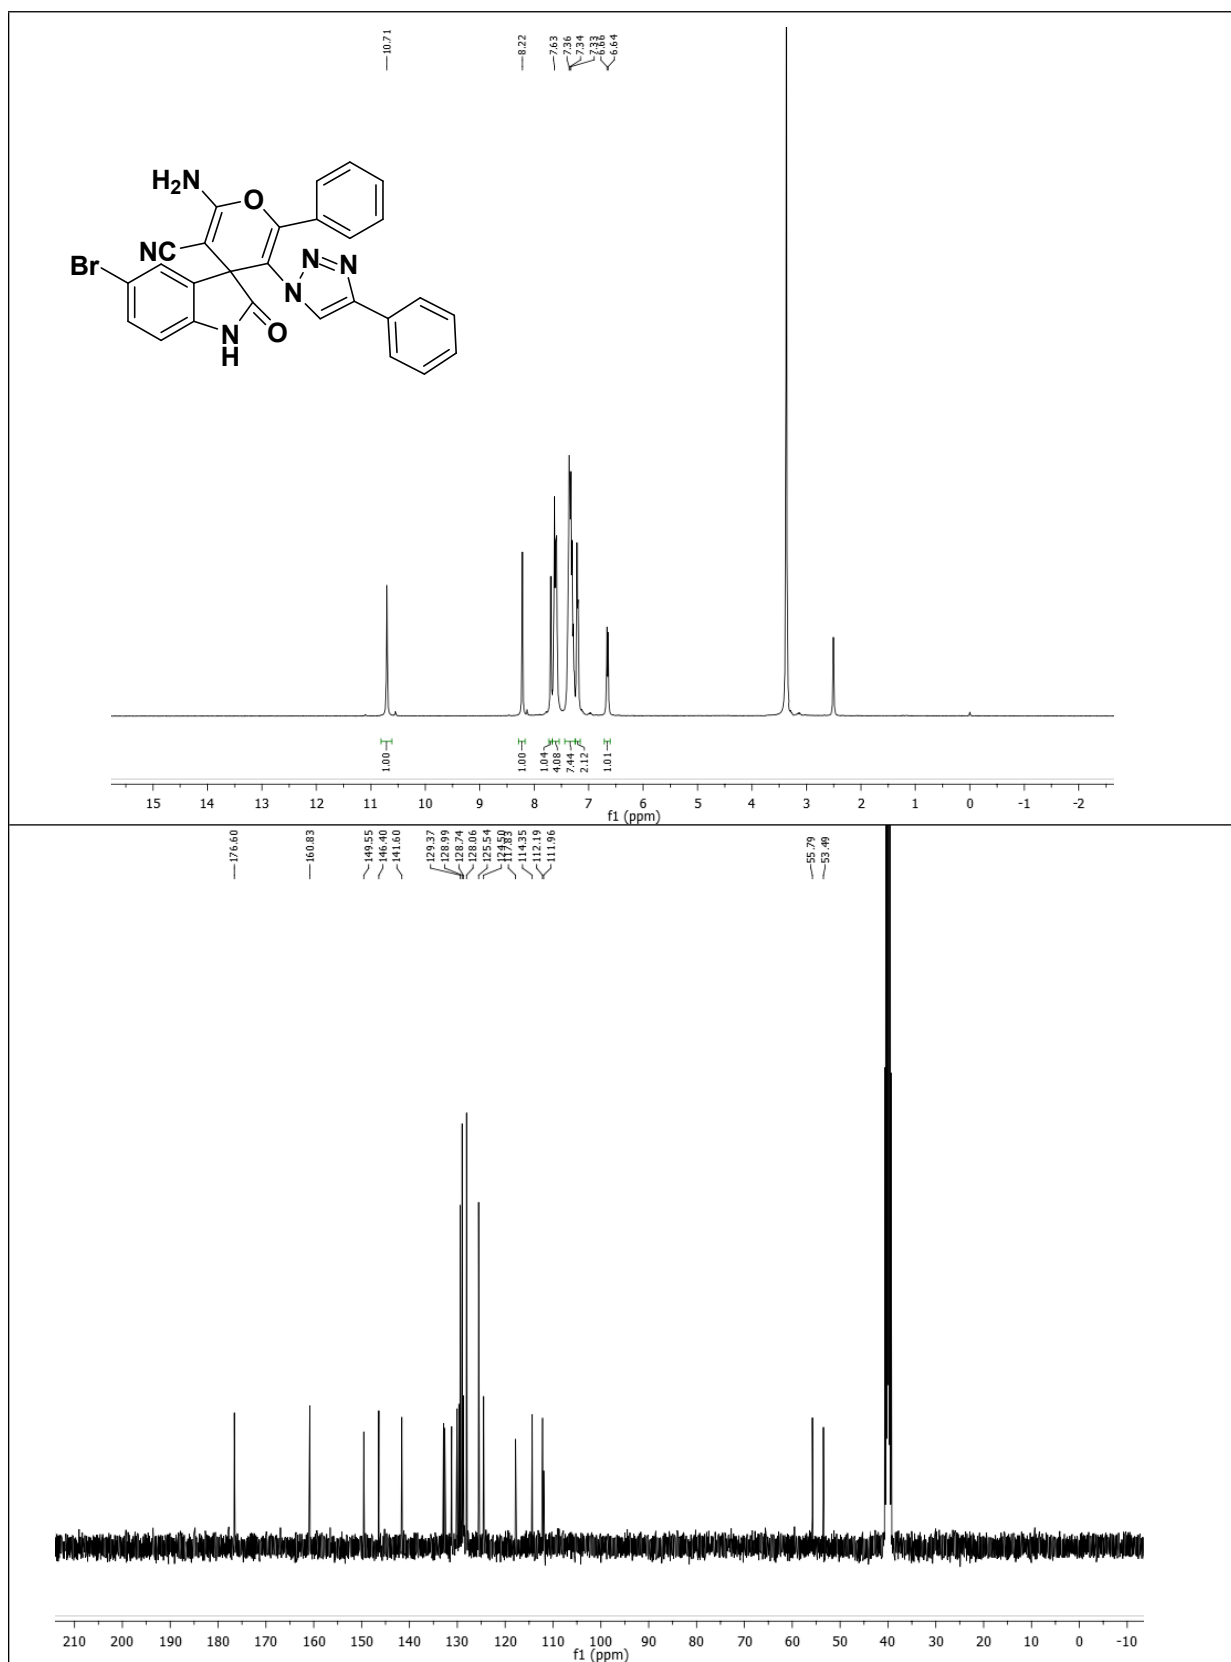

# <sup>1</sup>H and <sup>13</sup>C NMR Spectra of Compound 5g

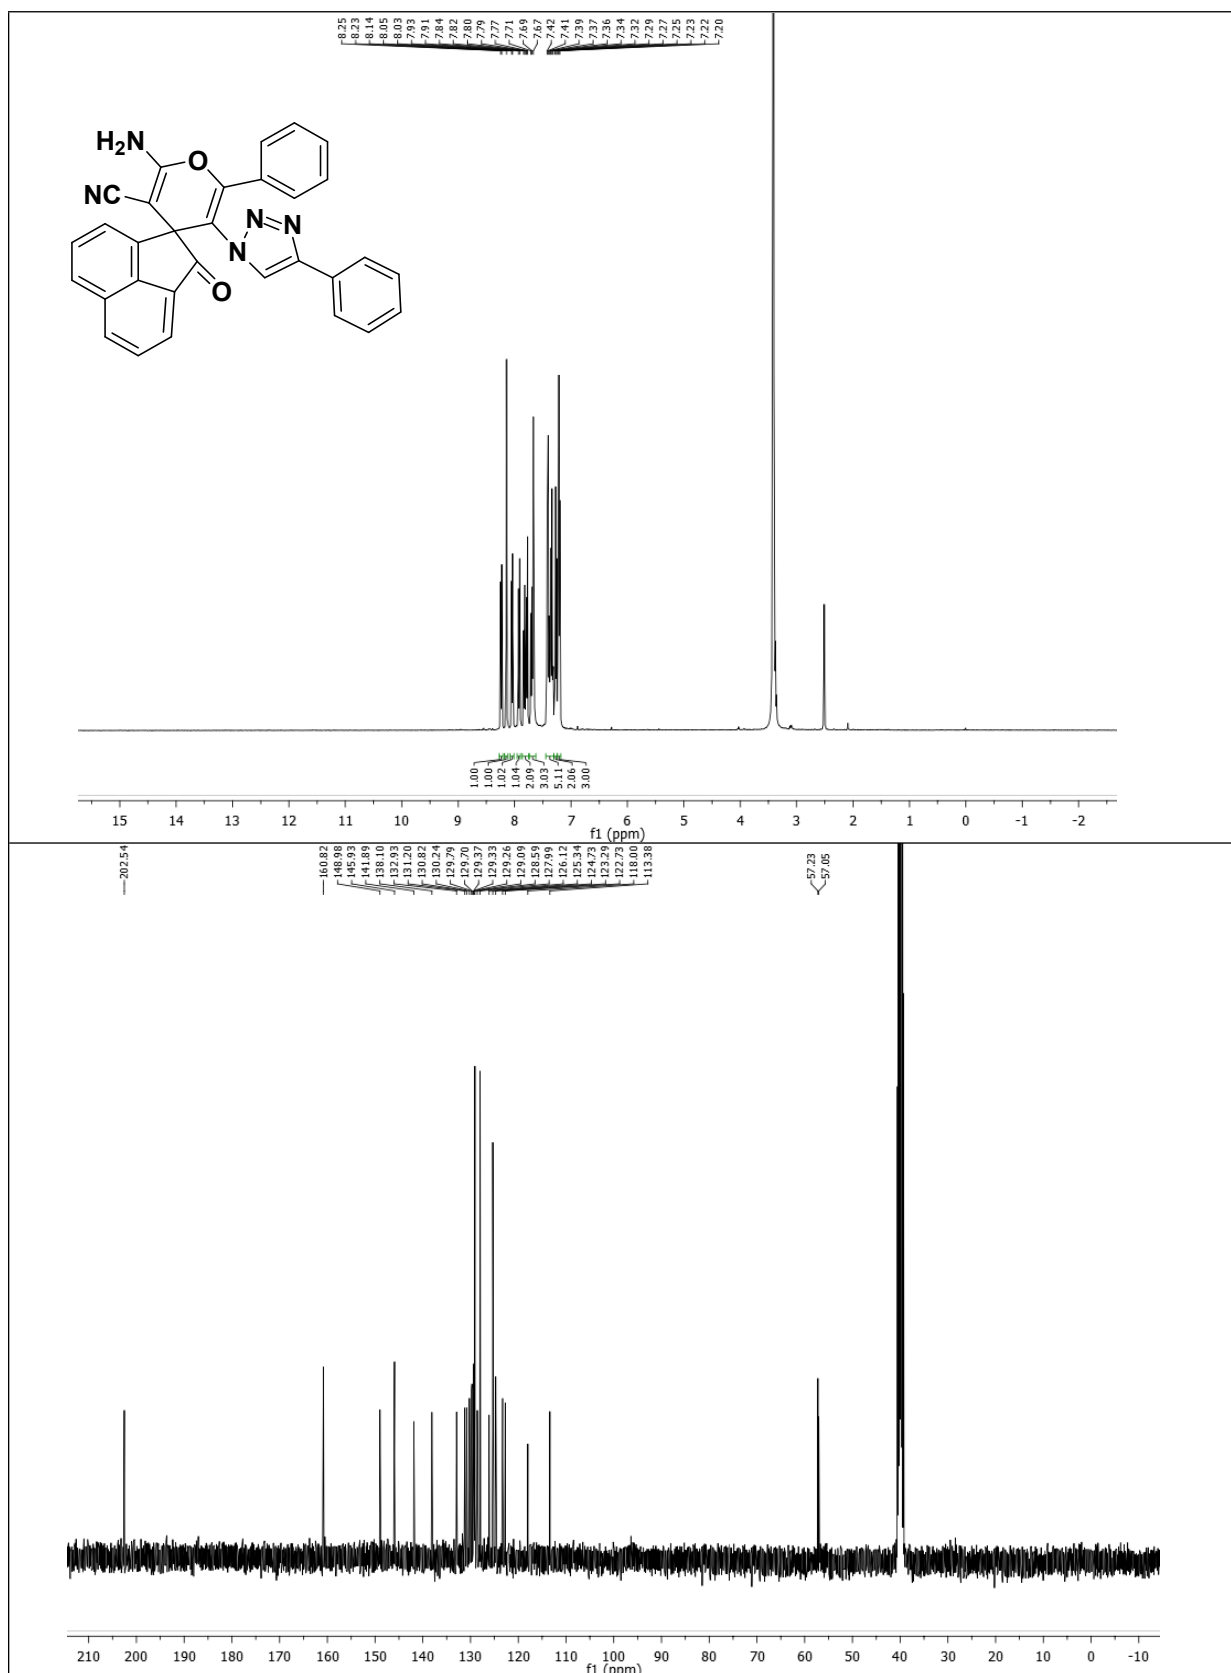



# <sup>1</sup>H and <sup>13</sup>C NMR Spectra of Compound 5h

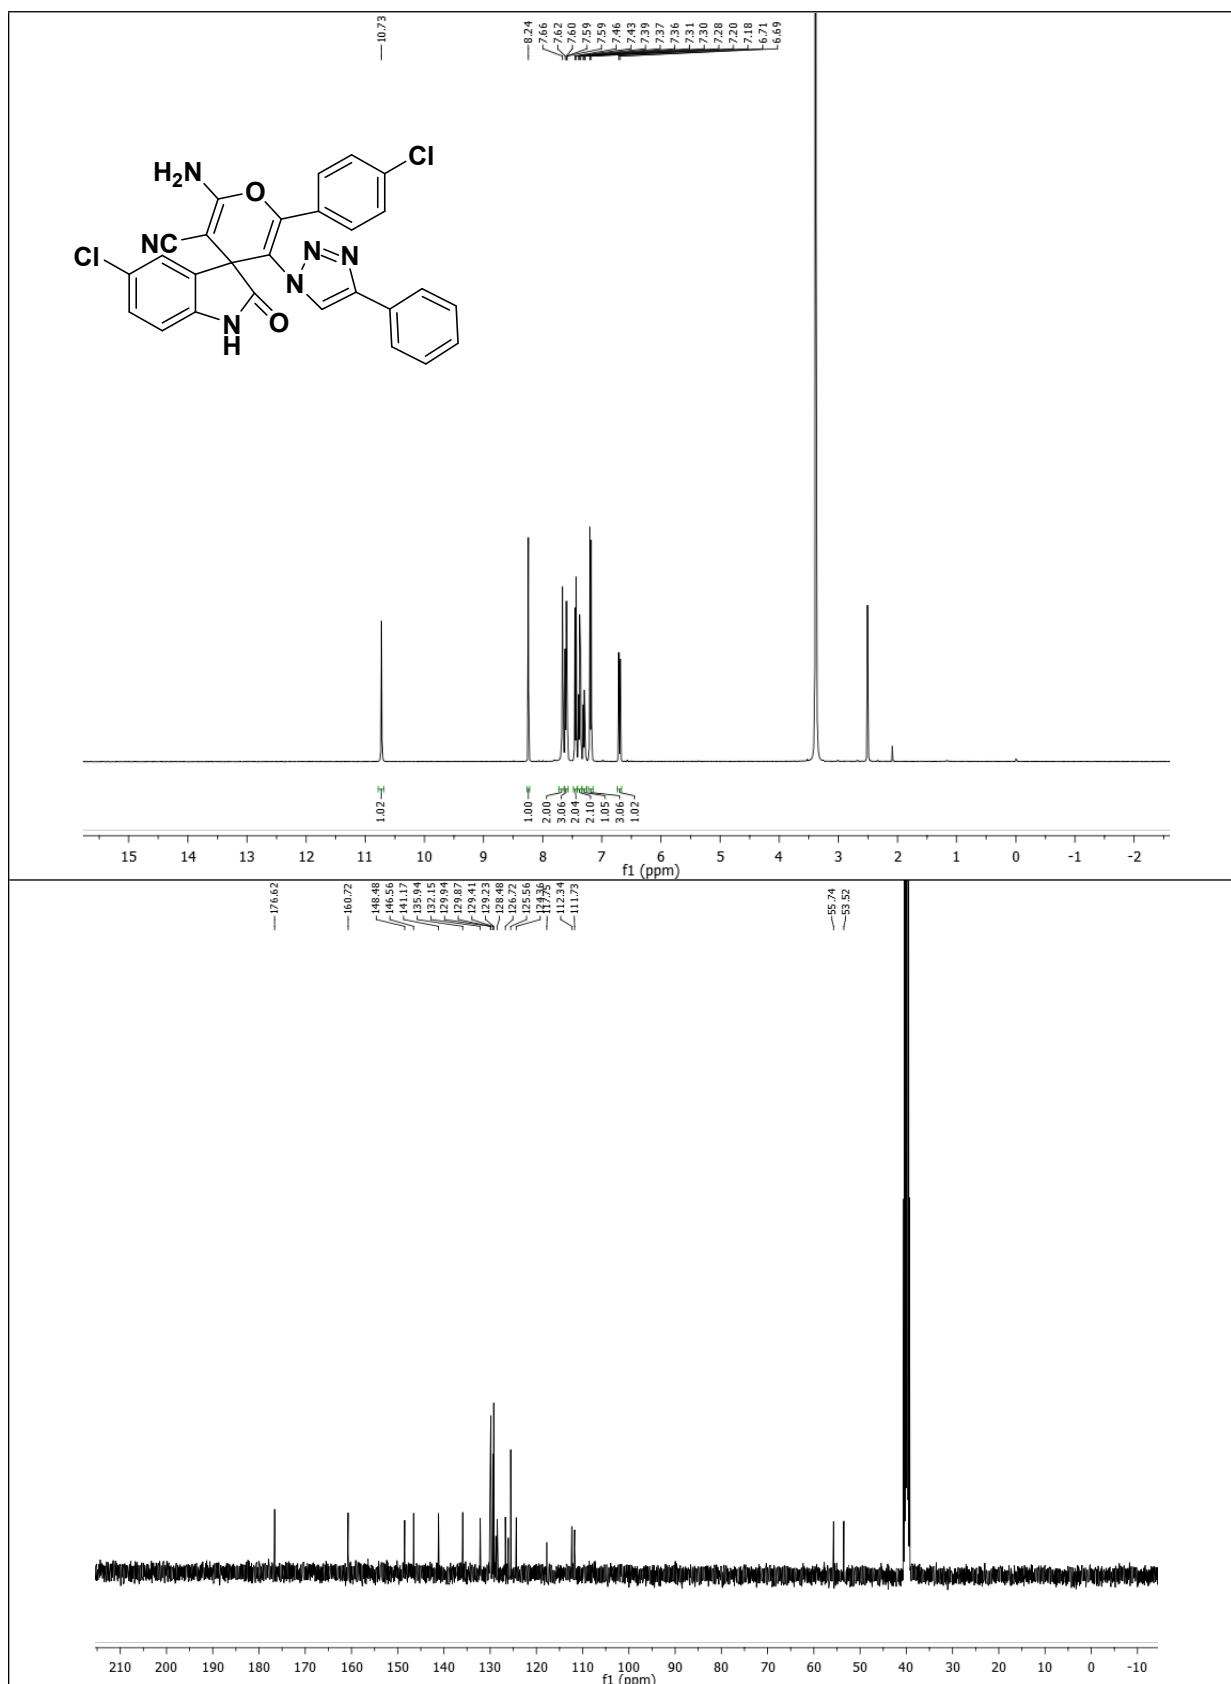

# <sup>1</sup>H and <sup>13</sup>C NMR Spectra of Compound 5i

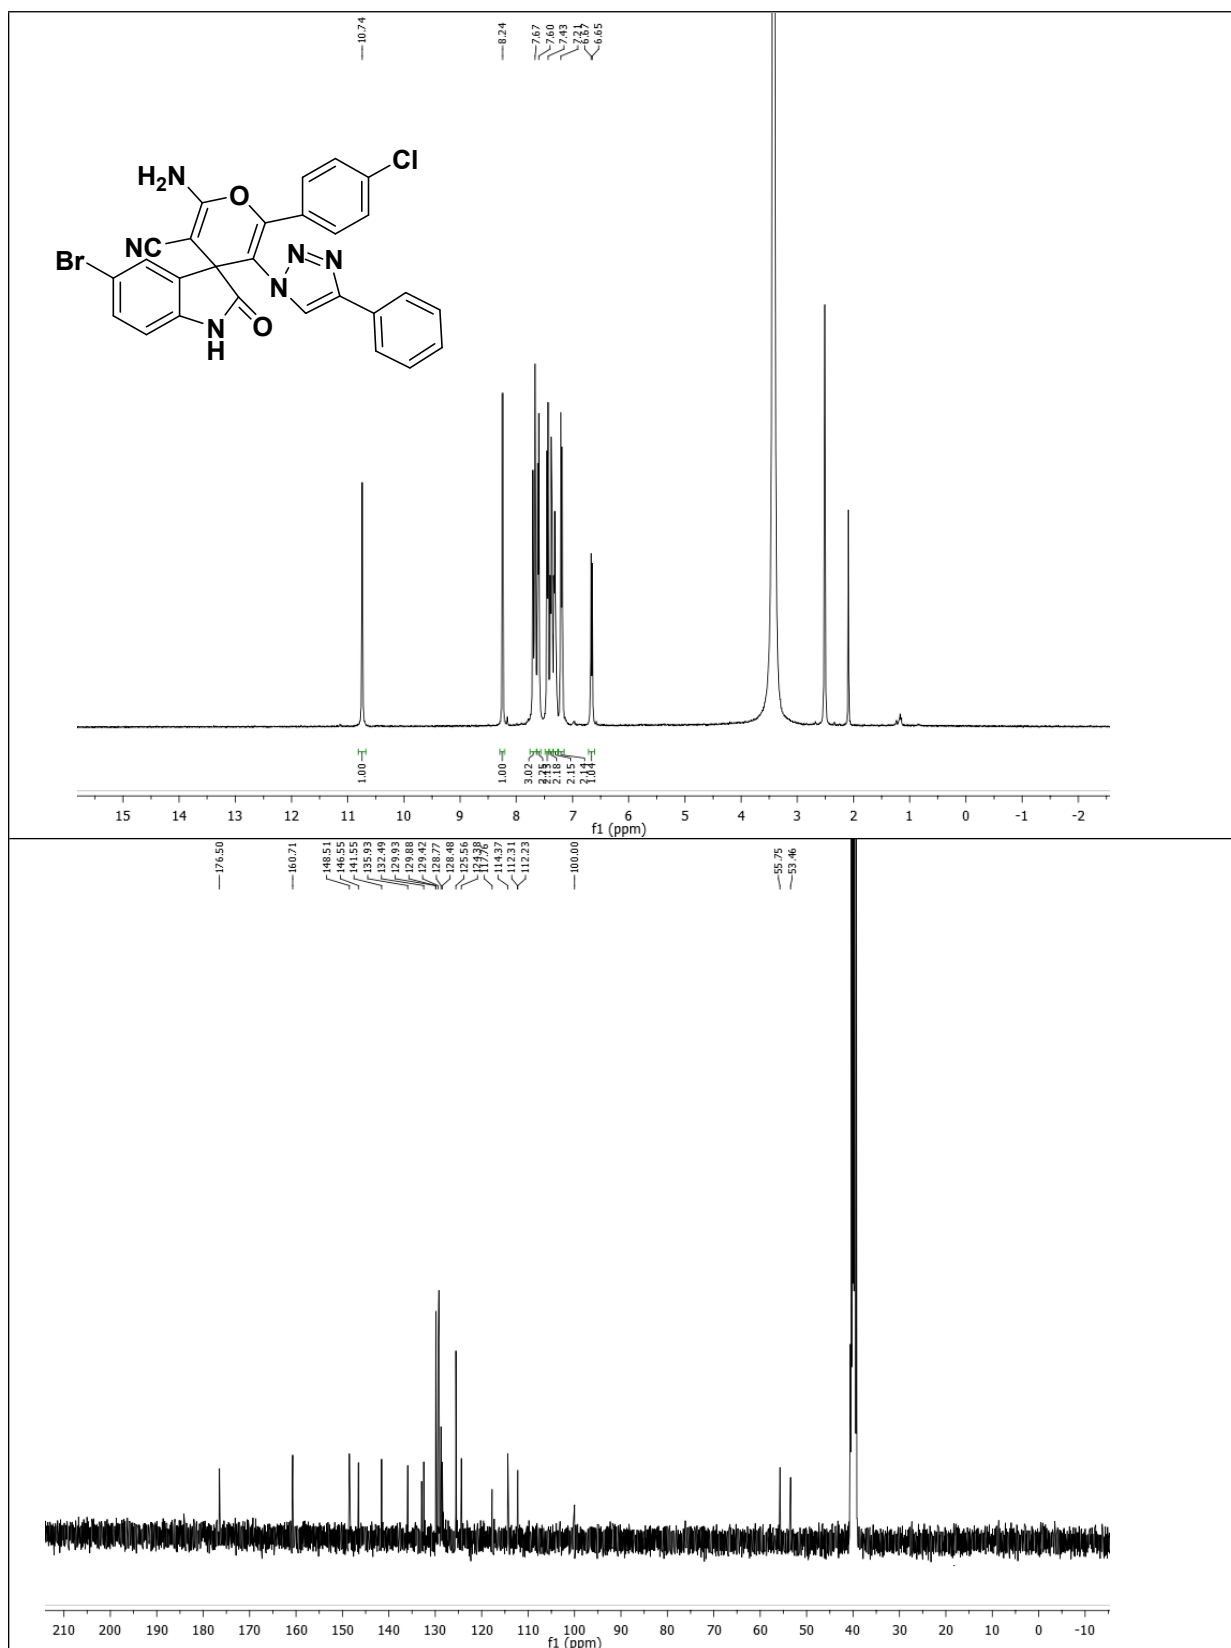

# <sup>1</sup>H and <sup>13</sup>C NMR Spectra of Compound 5j

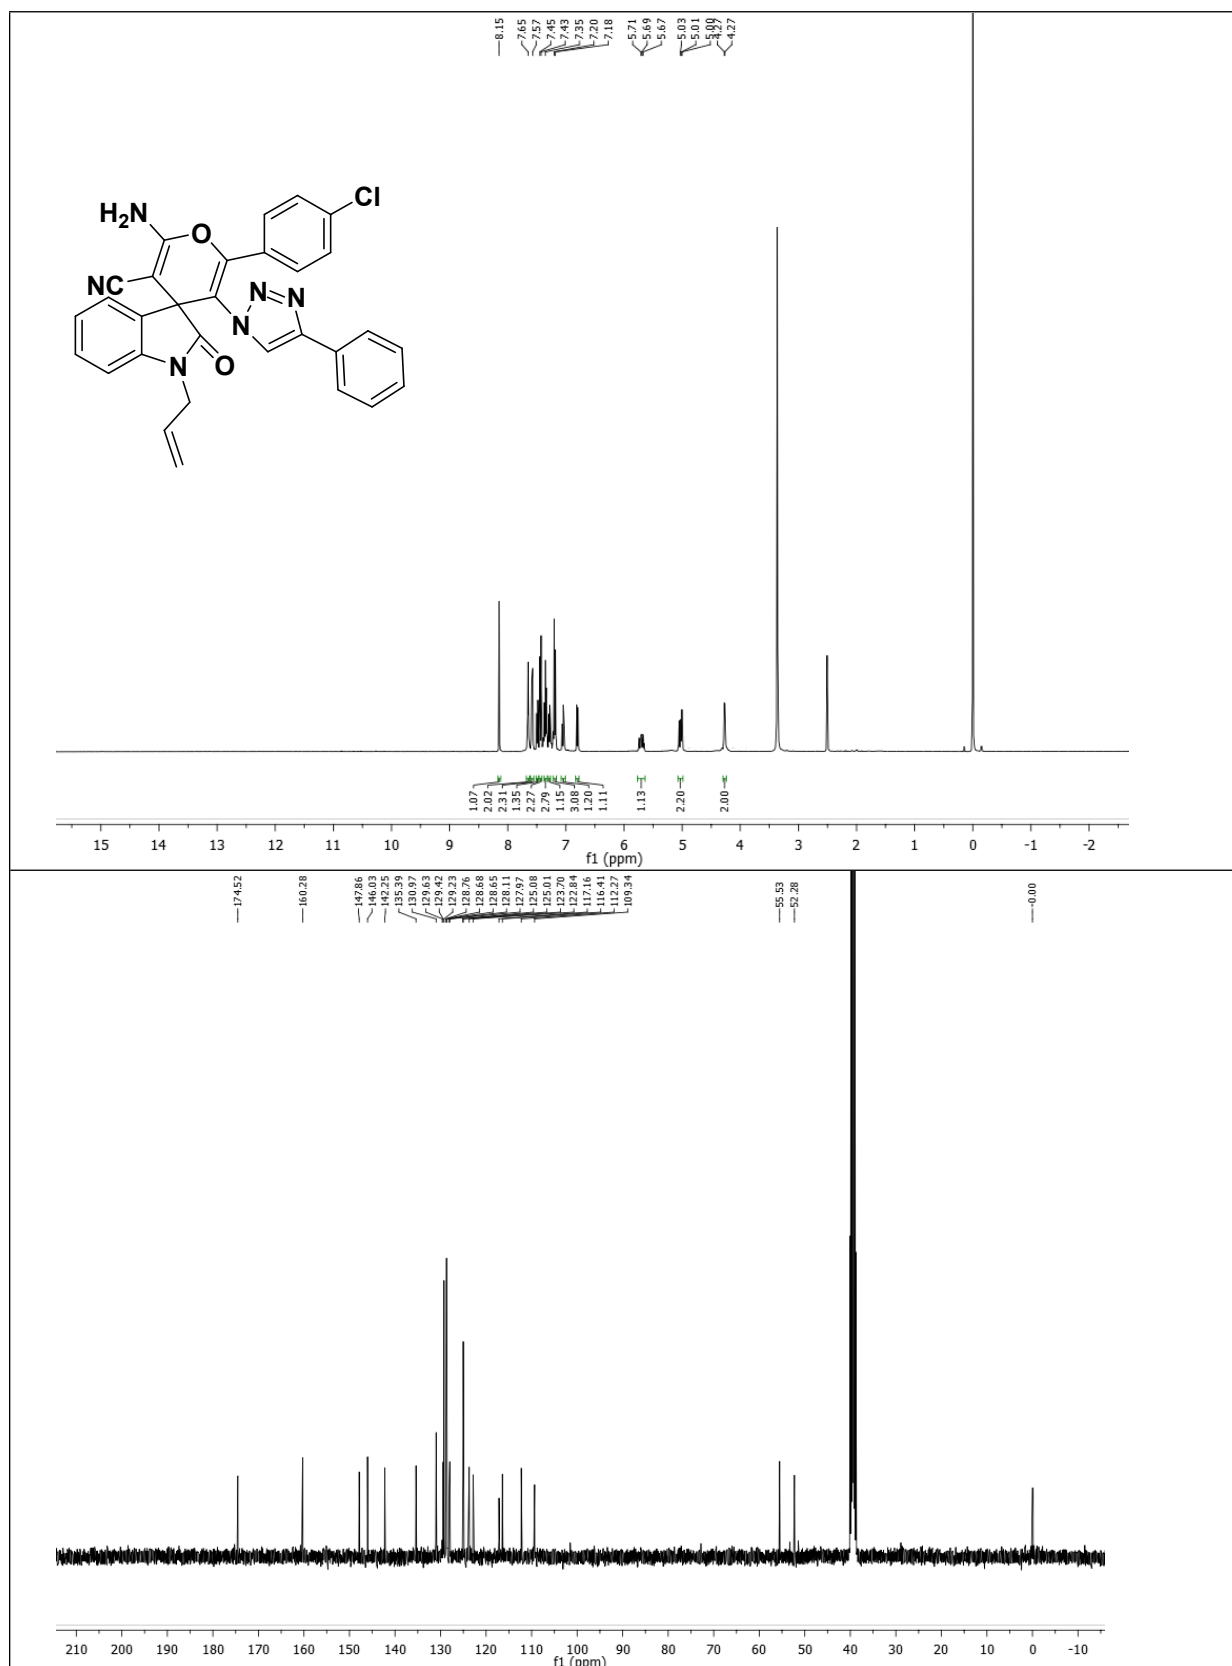

# <sup>1</sup>H and <sup>13</sup>C NMR Spectra of Compound 5k

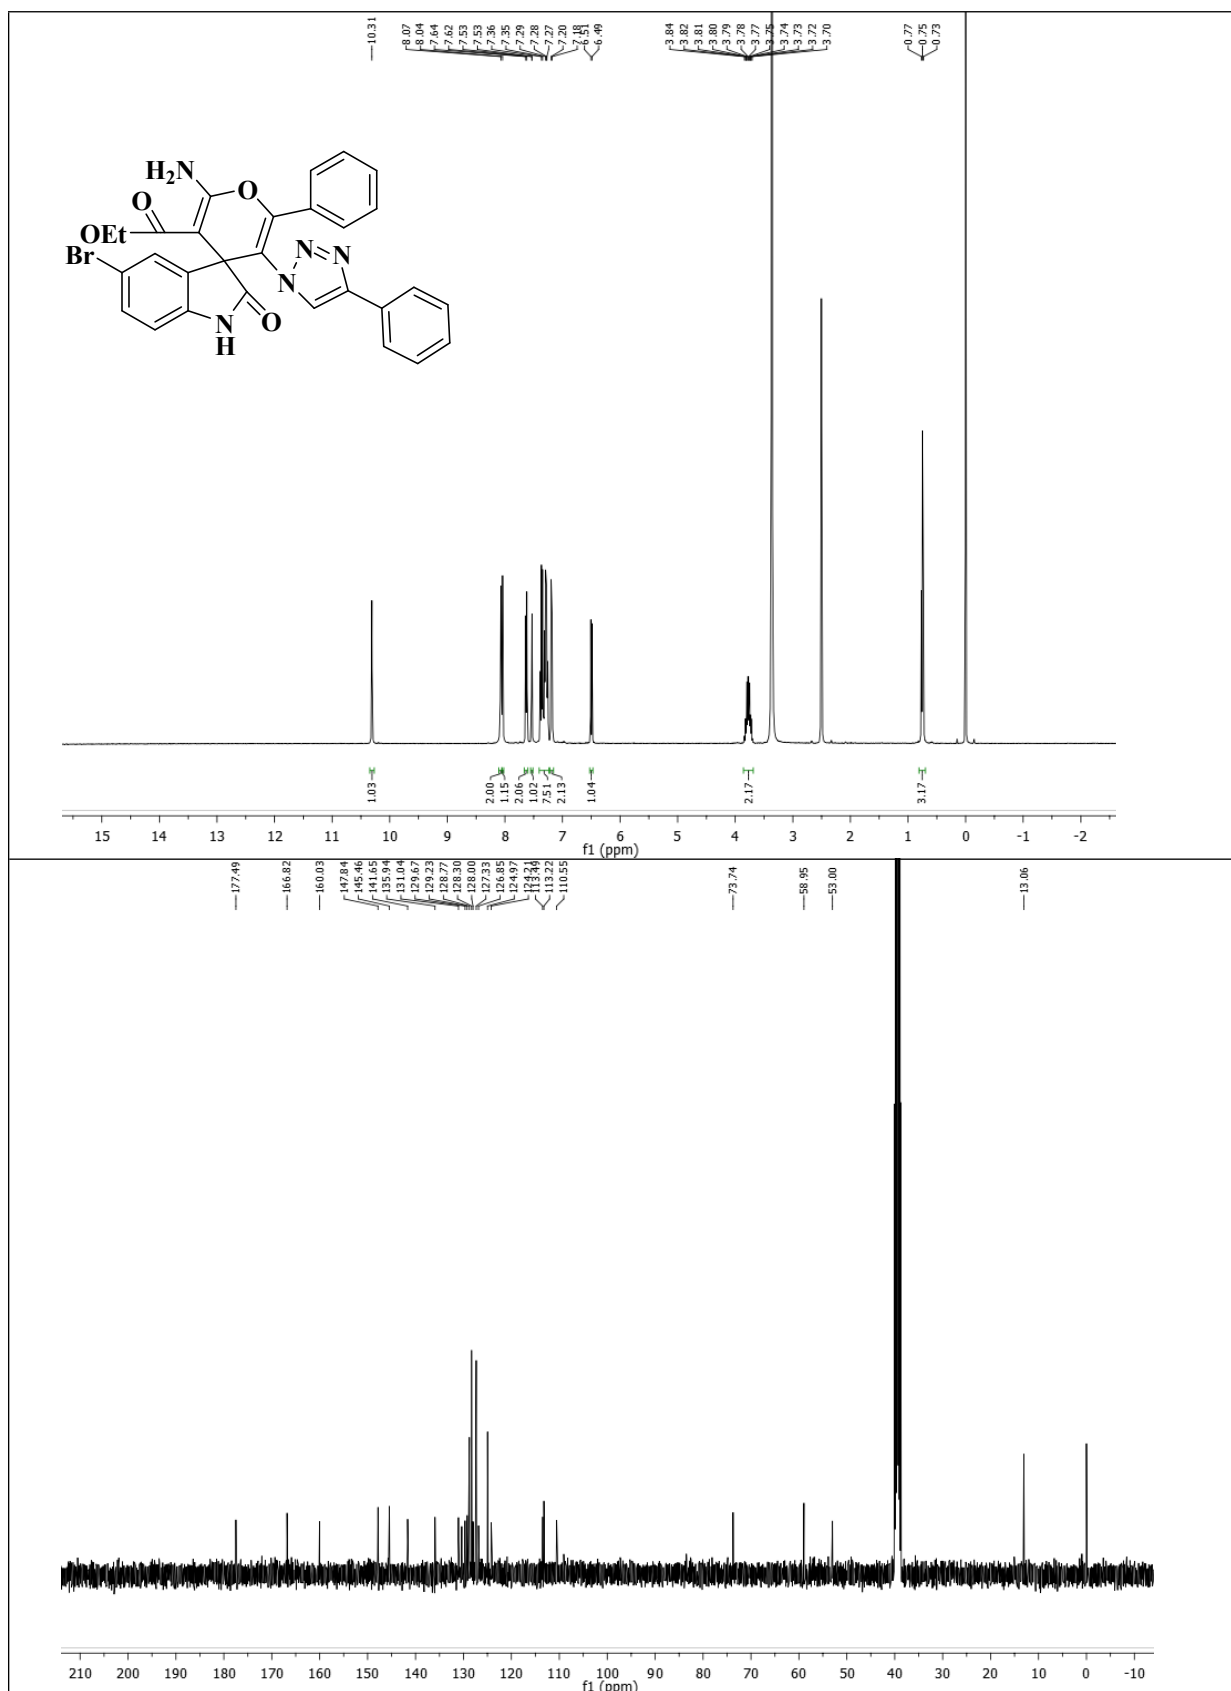

# <sup>1</sup>H and <sup>13</sup>C NMR Spectra of Compound 5l

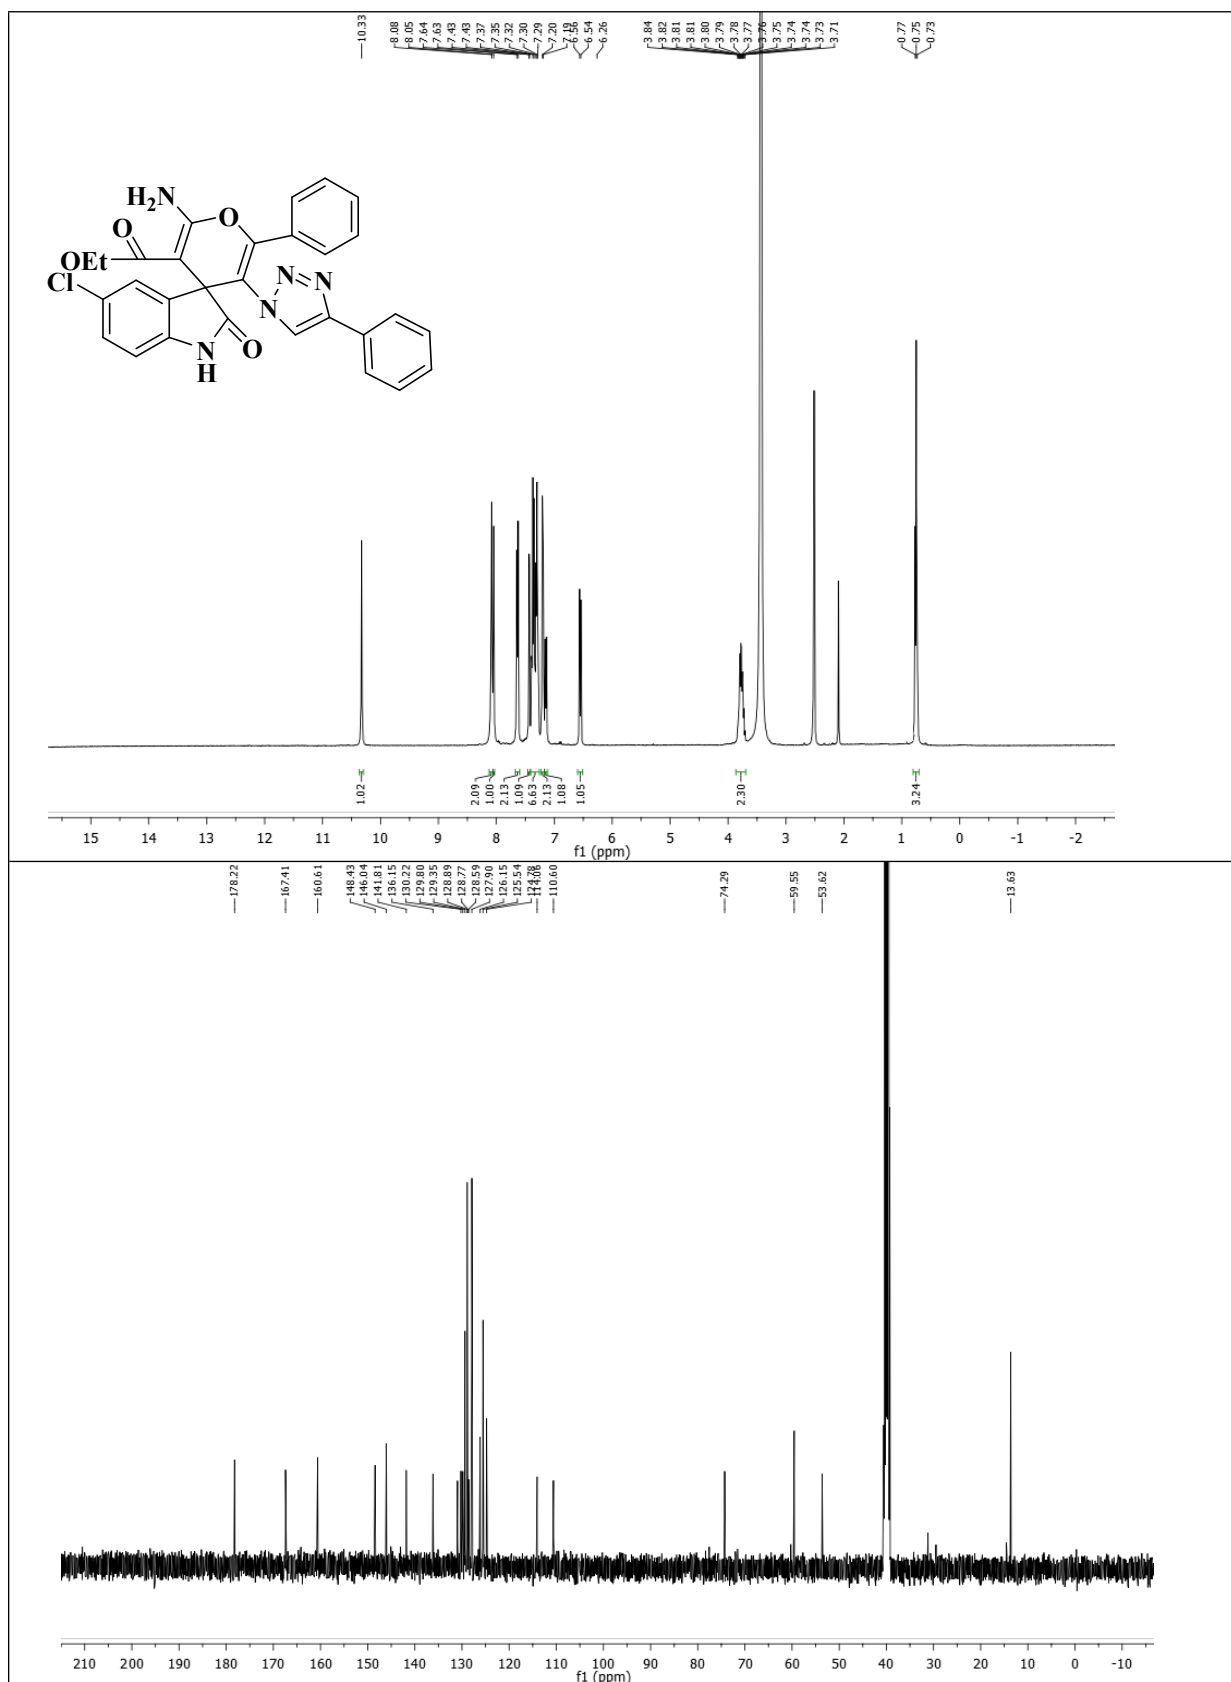

# <sup>1</sup>H and <sup>13</sup>C NMR Spectra of Compound 5m

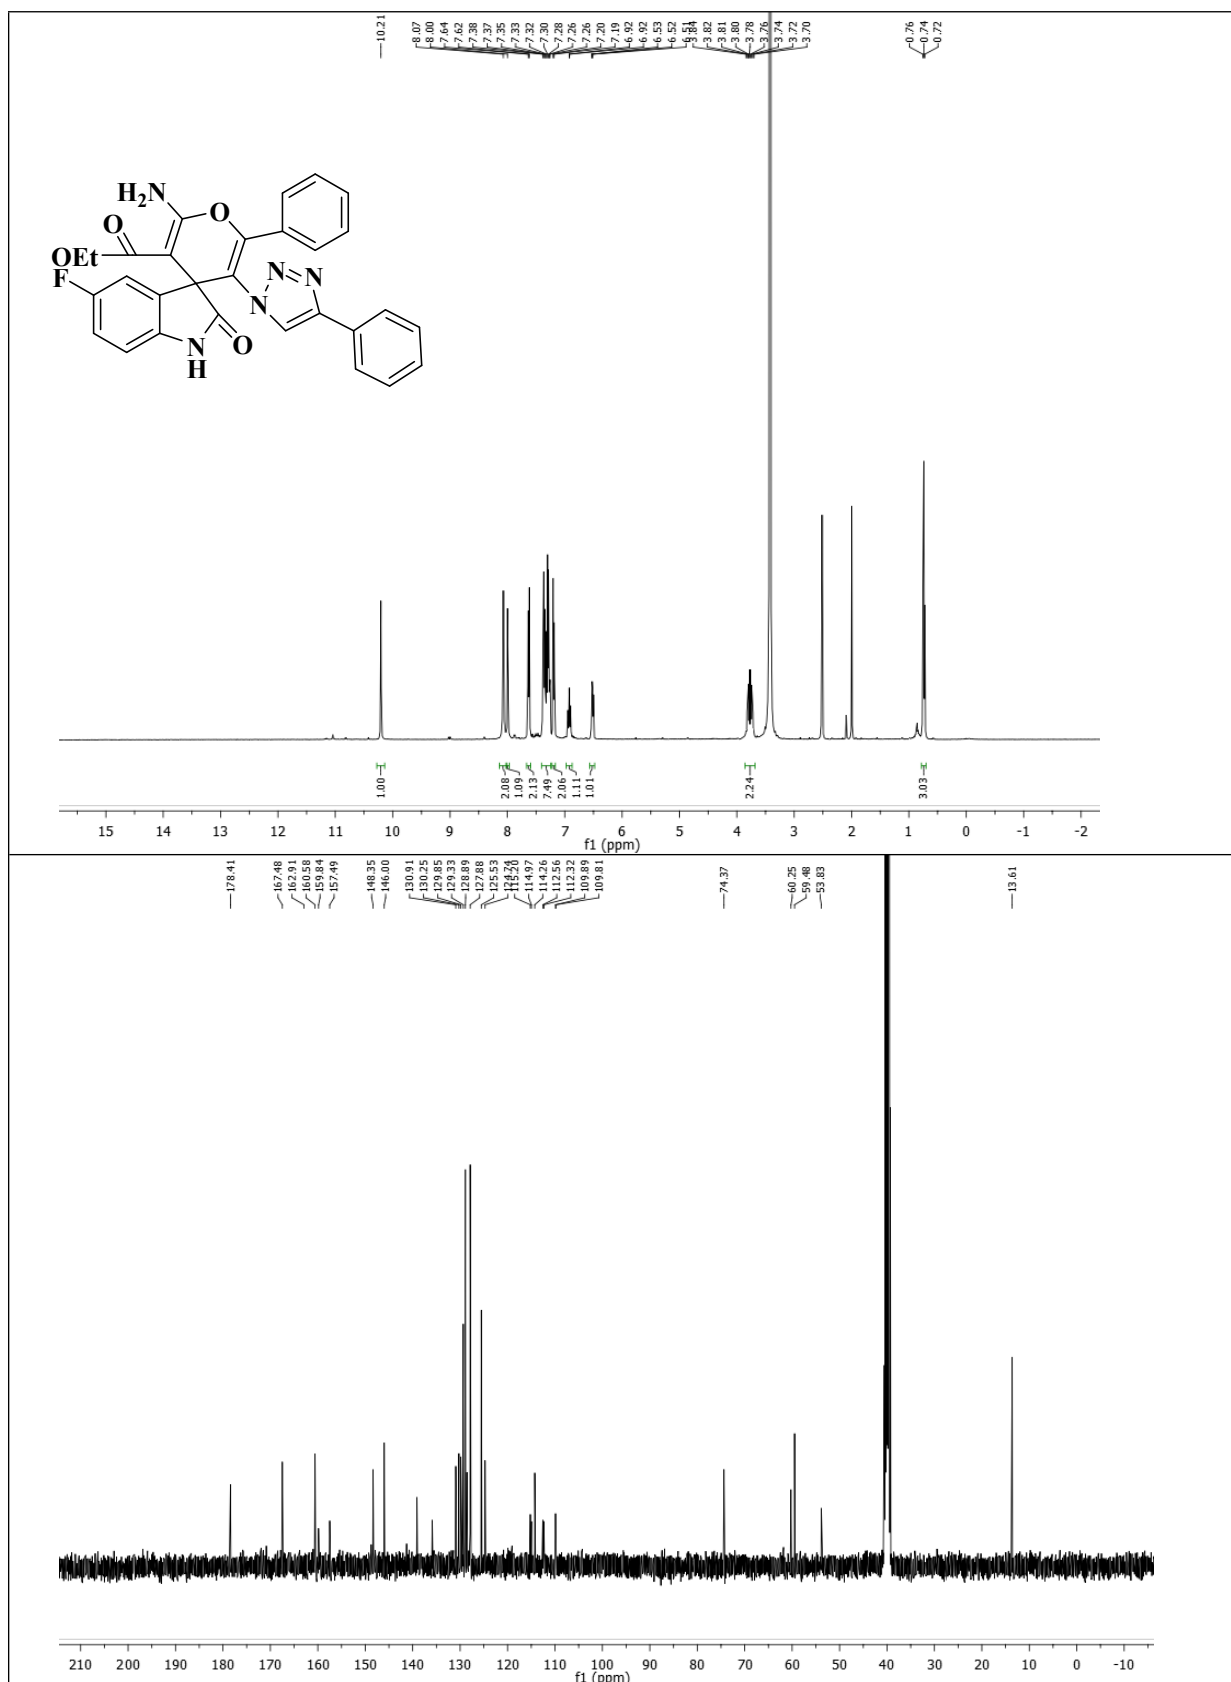

# <sup>1</sup>H and <sup>13</sup>C NMR Spectra of Compound 5n

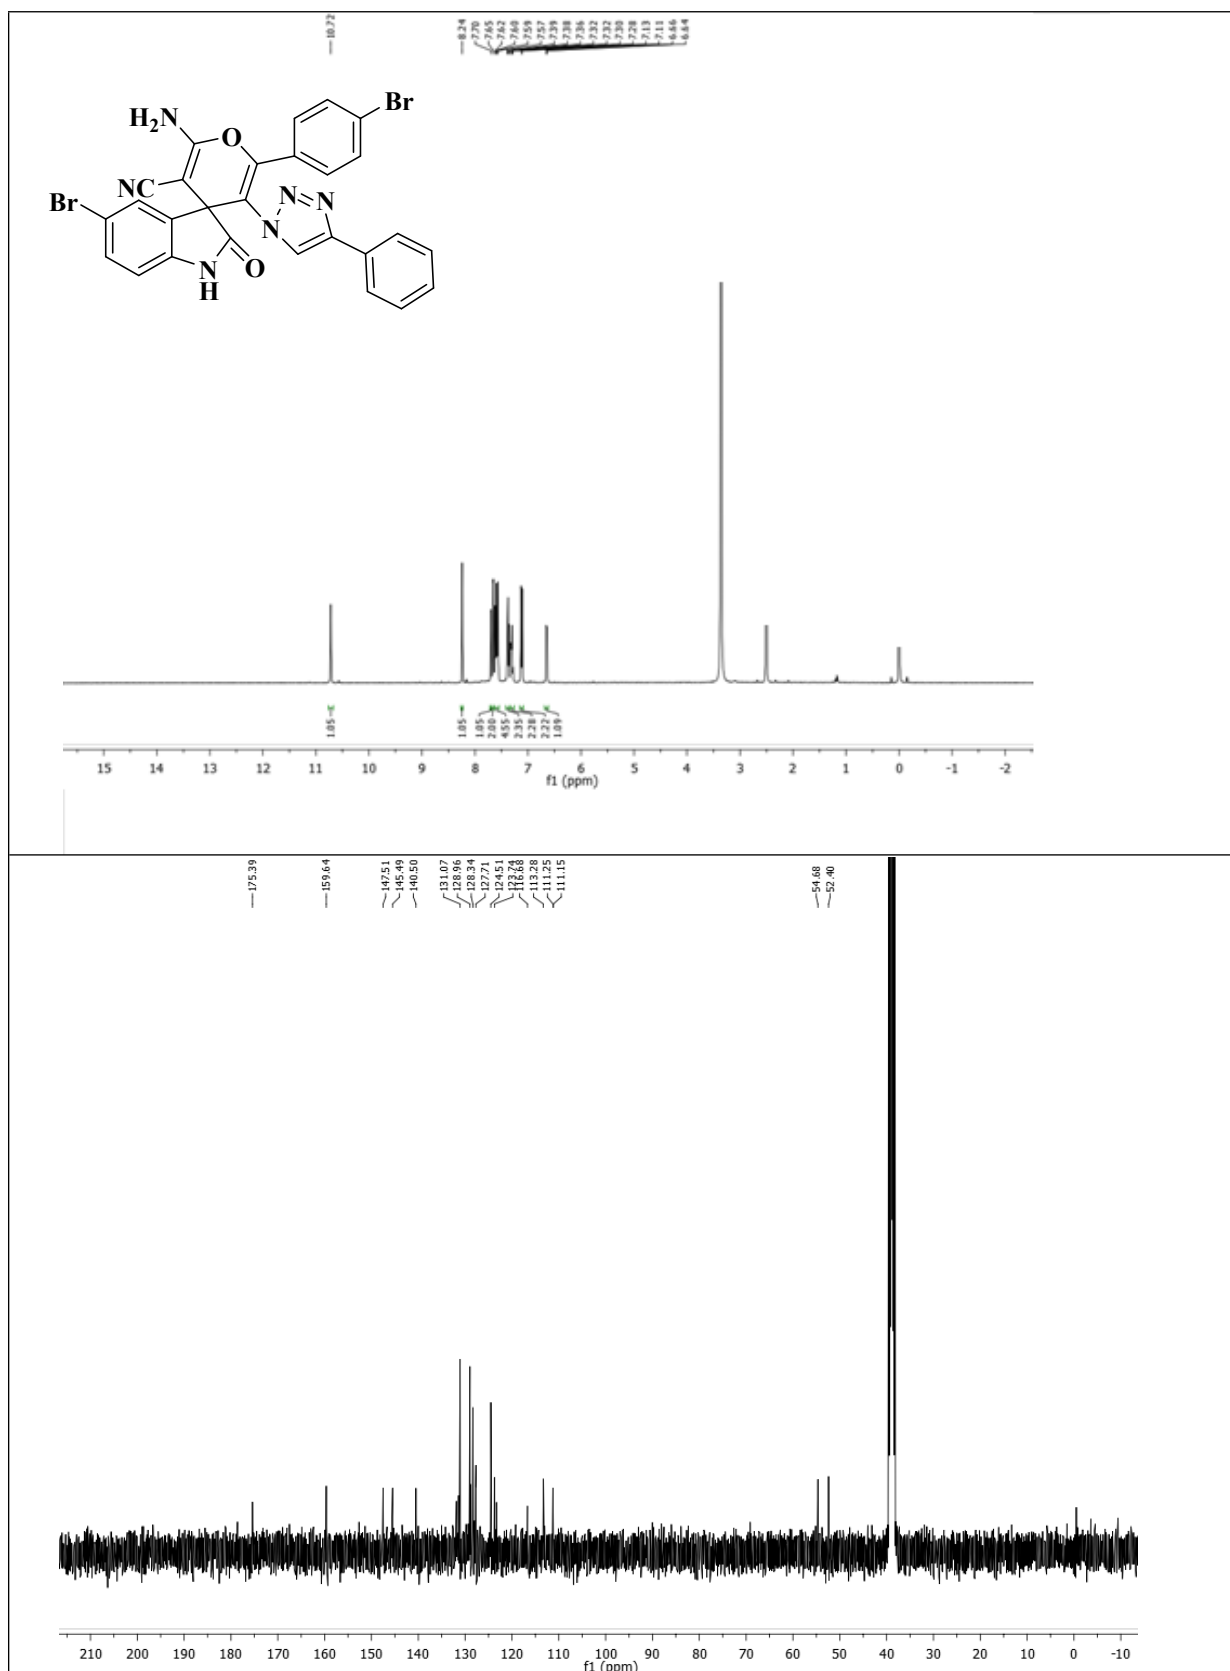

# <sup>1</sup>H and <sup>13</sup>C NMR Spectra of Compound 50

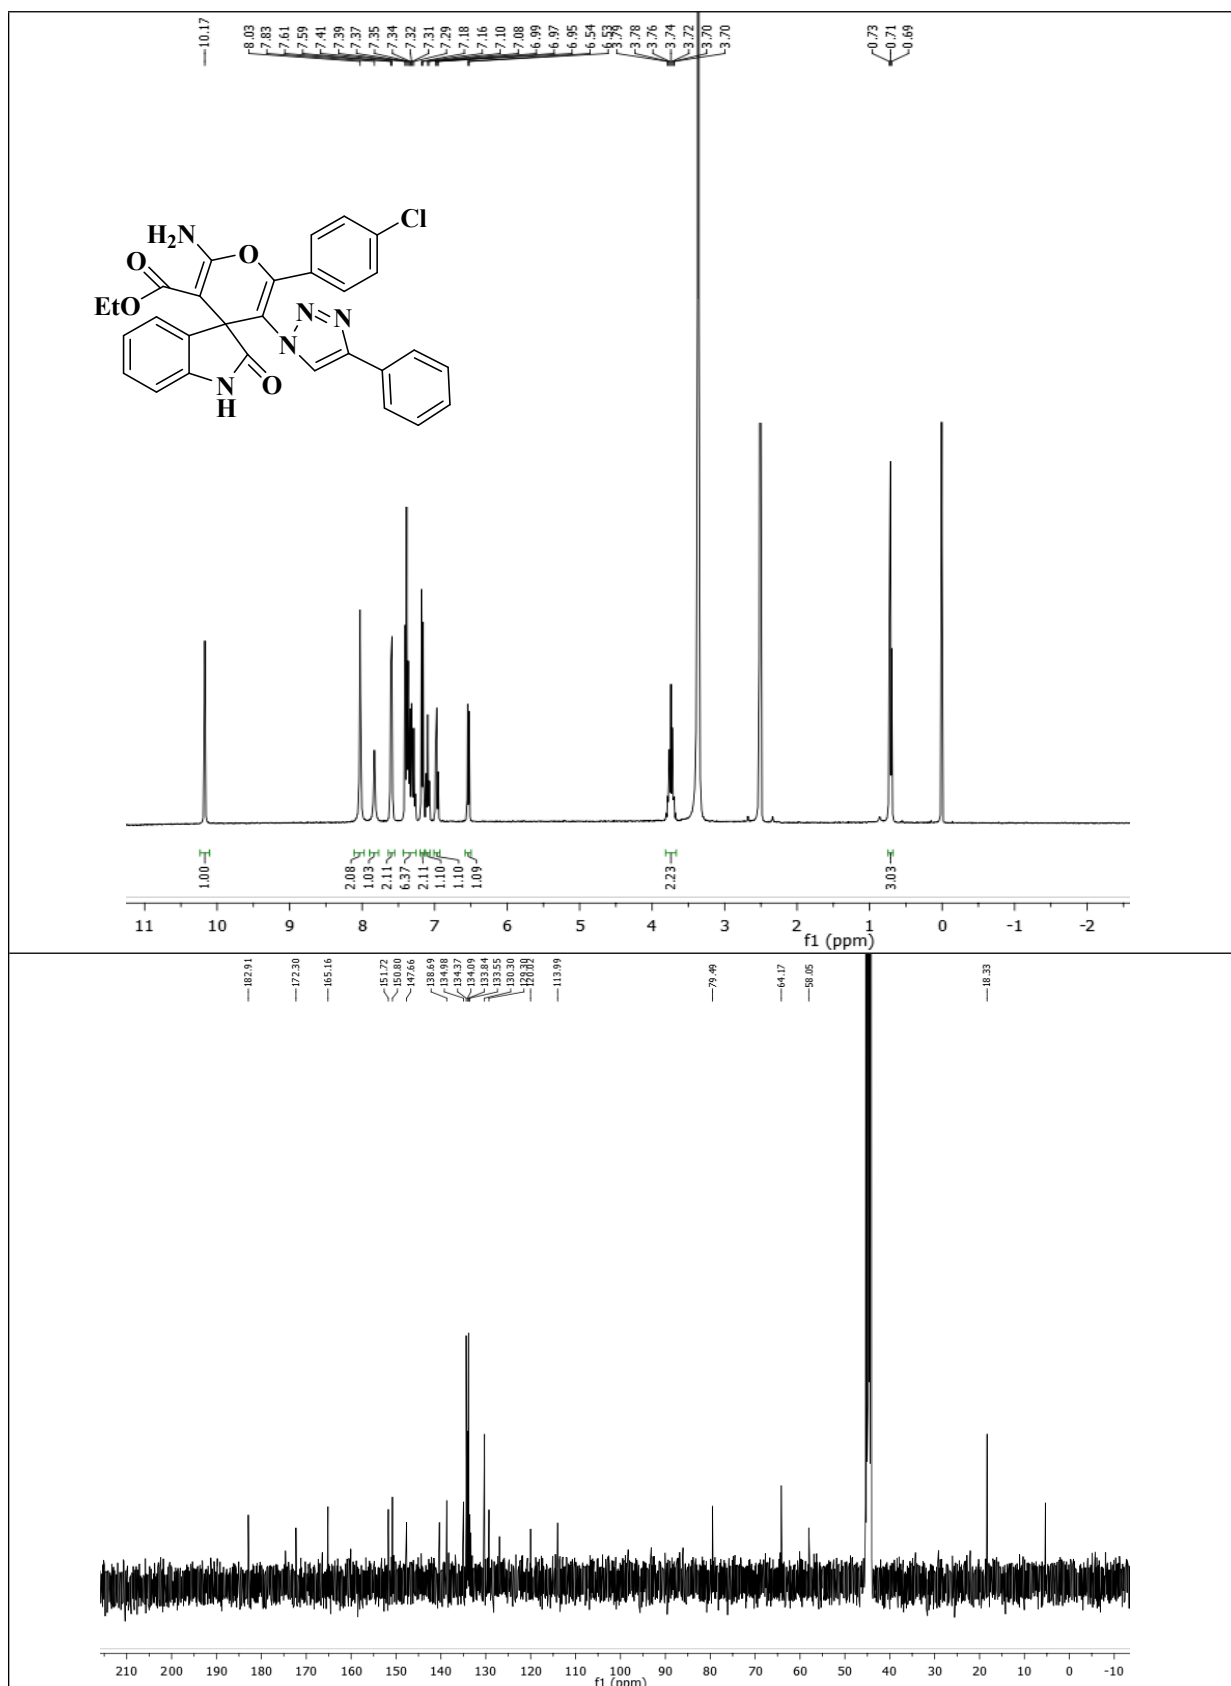



# <sup>1</sup>H and <sup>13</sup>C NMR Spectra of Compound 5p

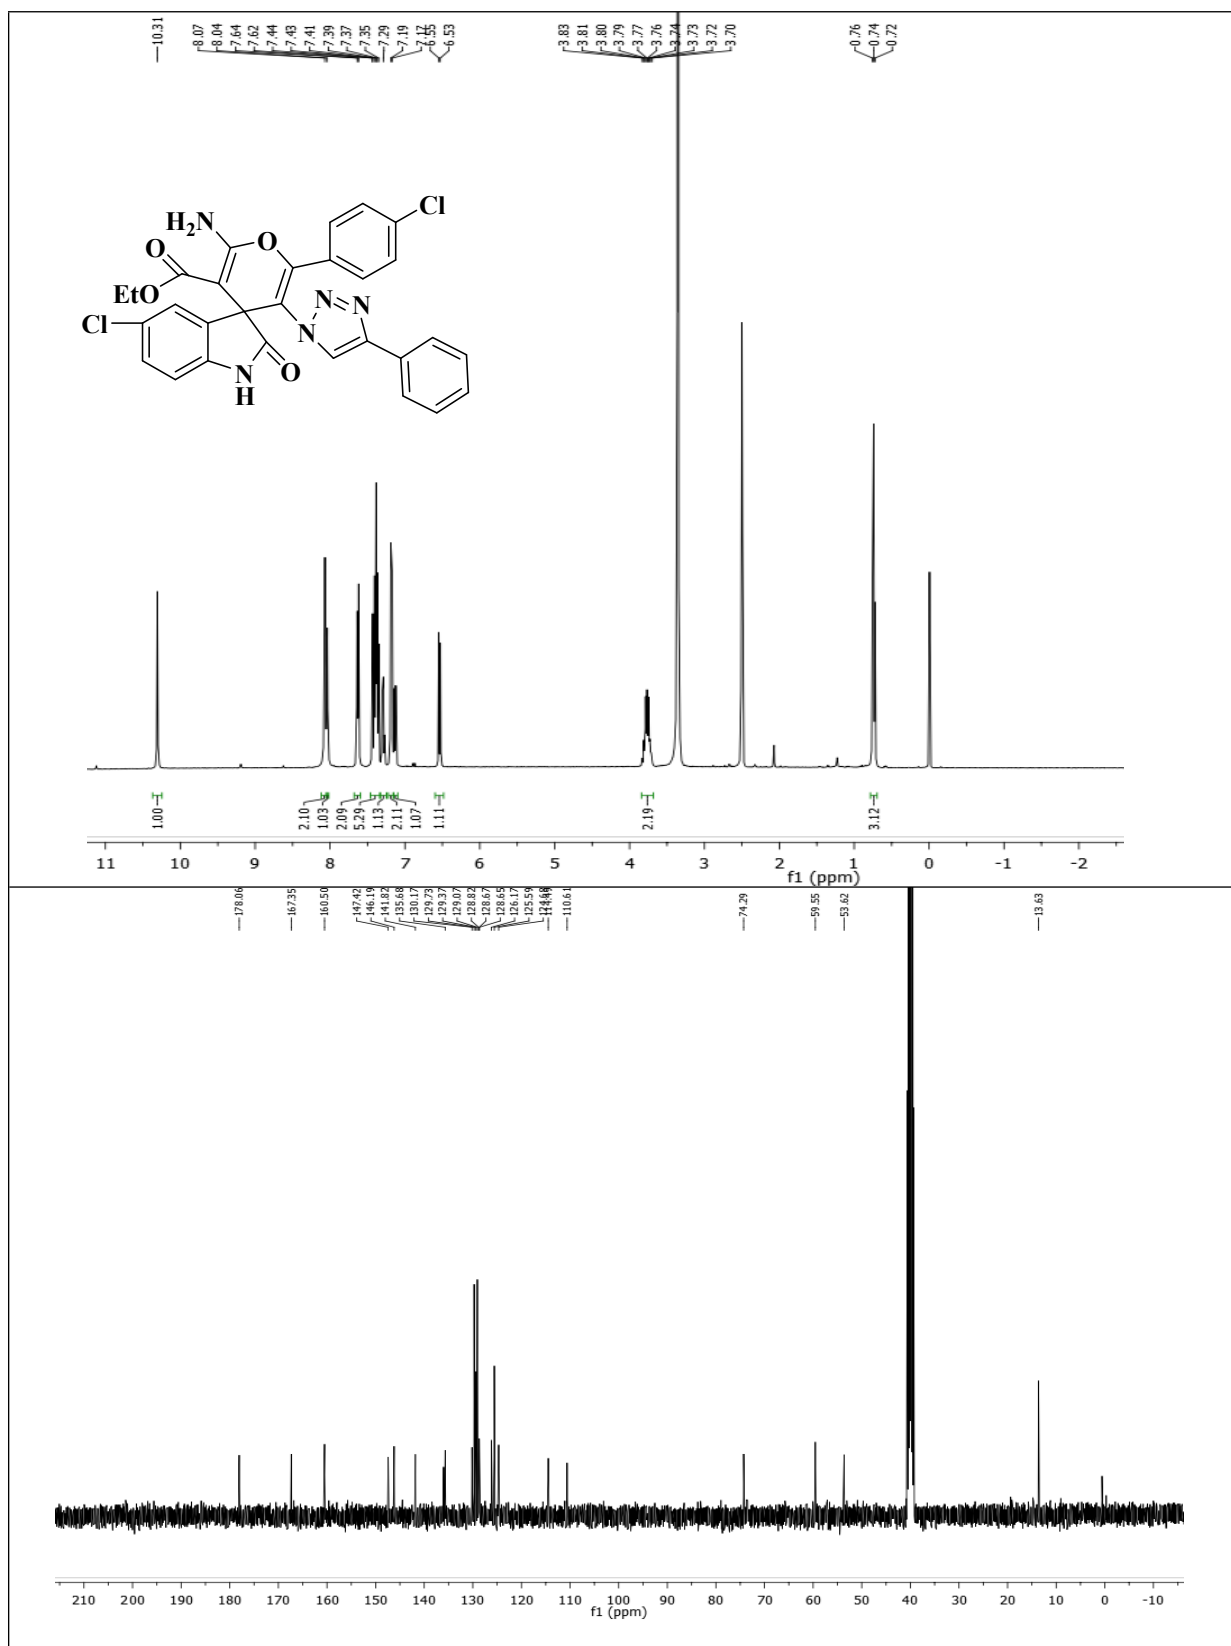

# <sup>1</sup>H and <sup>13</sup>C NMR Spectra of Compound 5q

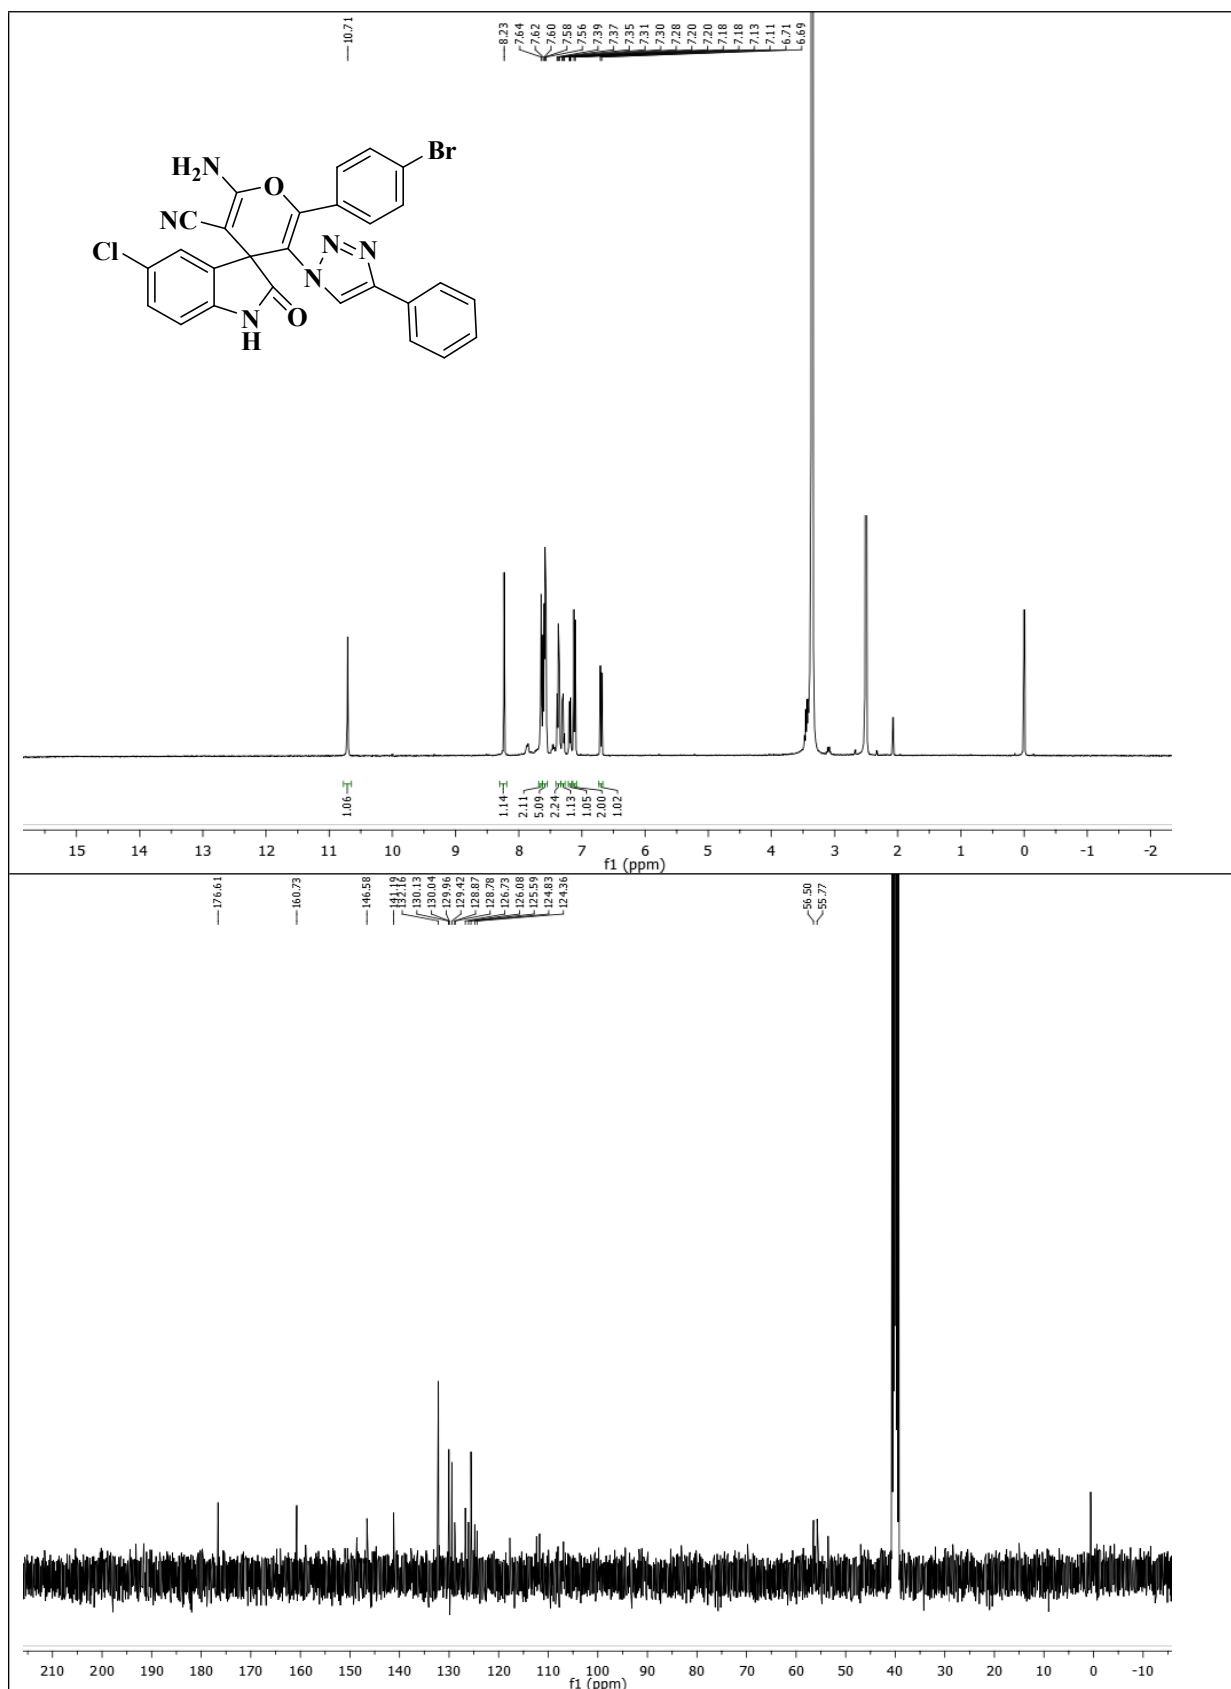

# <sup>1</sup>H and <sup>13</sup>C NMR Spectra of Compound 5r

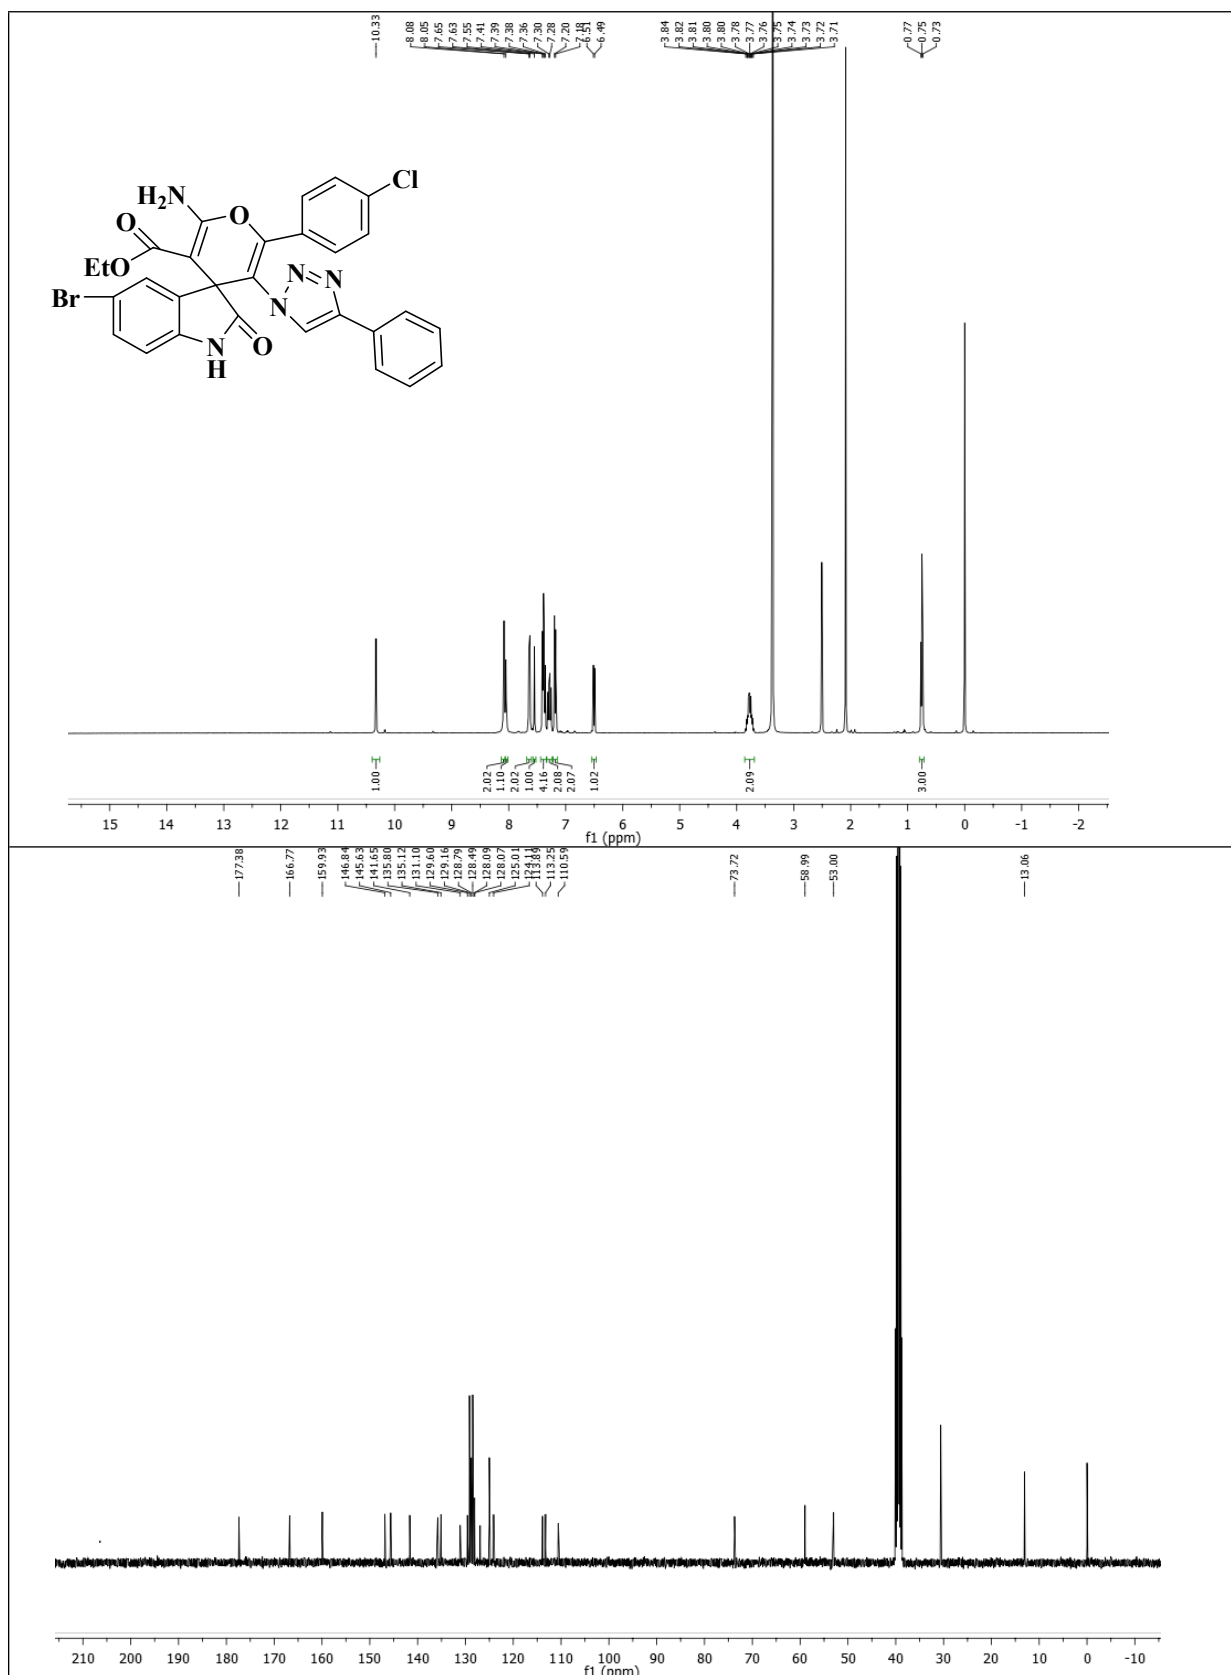

# $^1\text{H}$ and $^{13}\text{C}$ NMR Spectra of Compound 5s

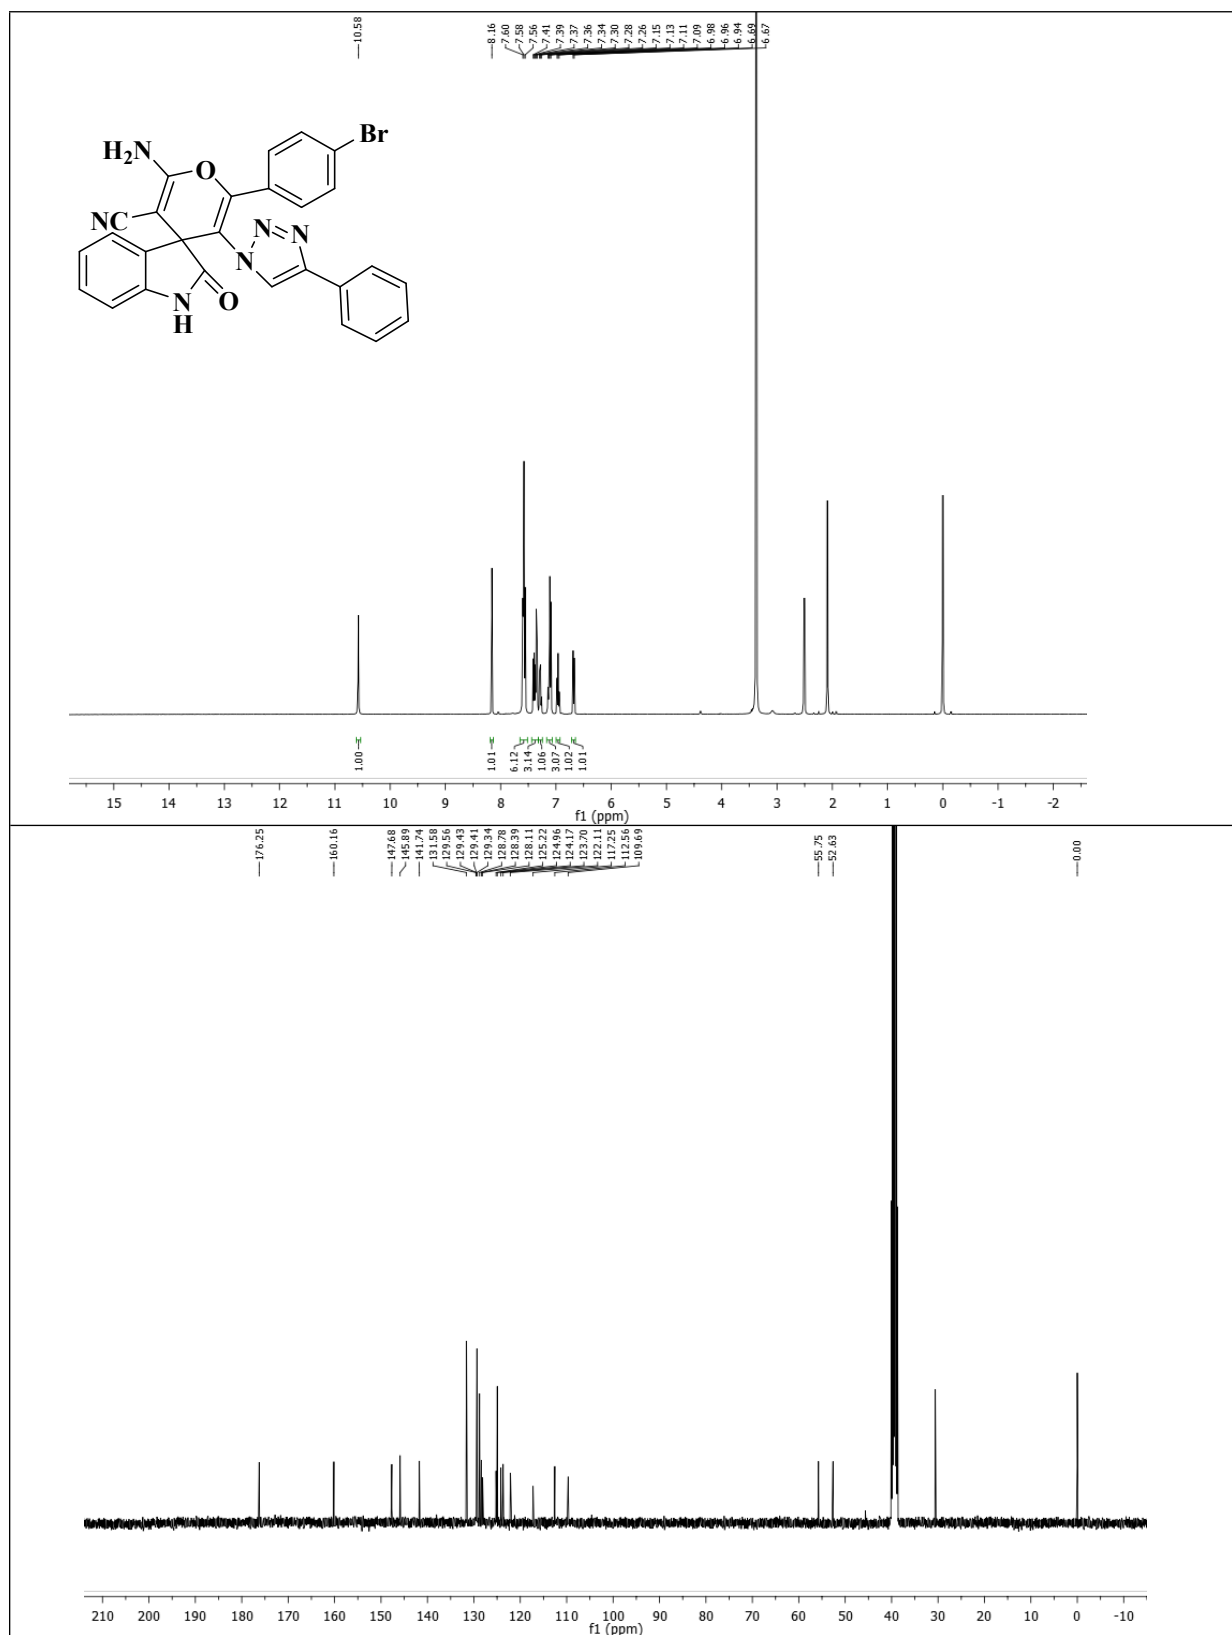

# <sup>1</sup>H and <sup>13</sup>C NMR Spectra of Compound 5t

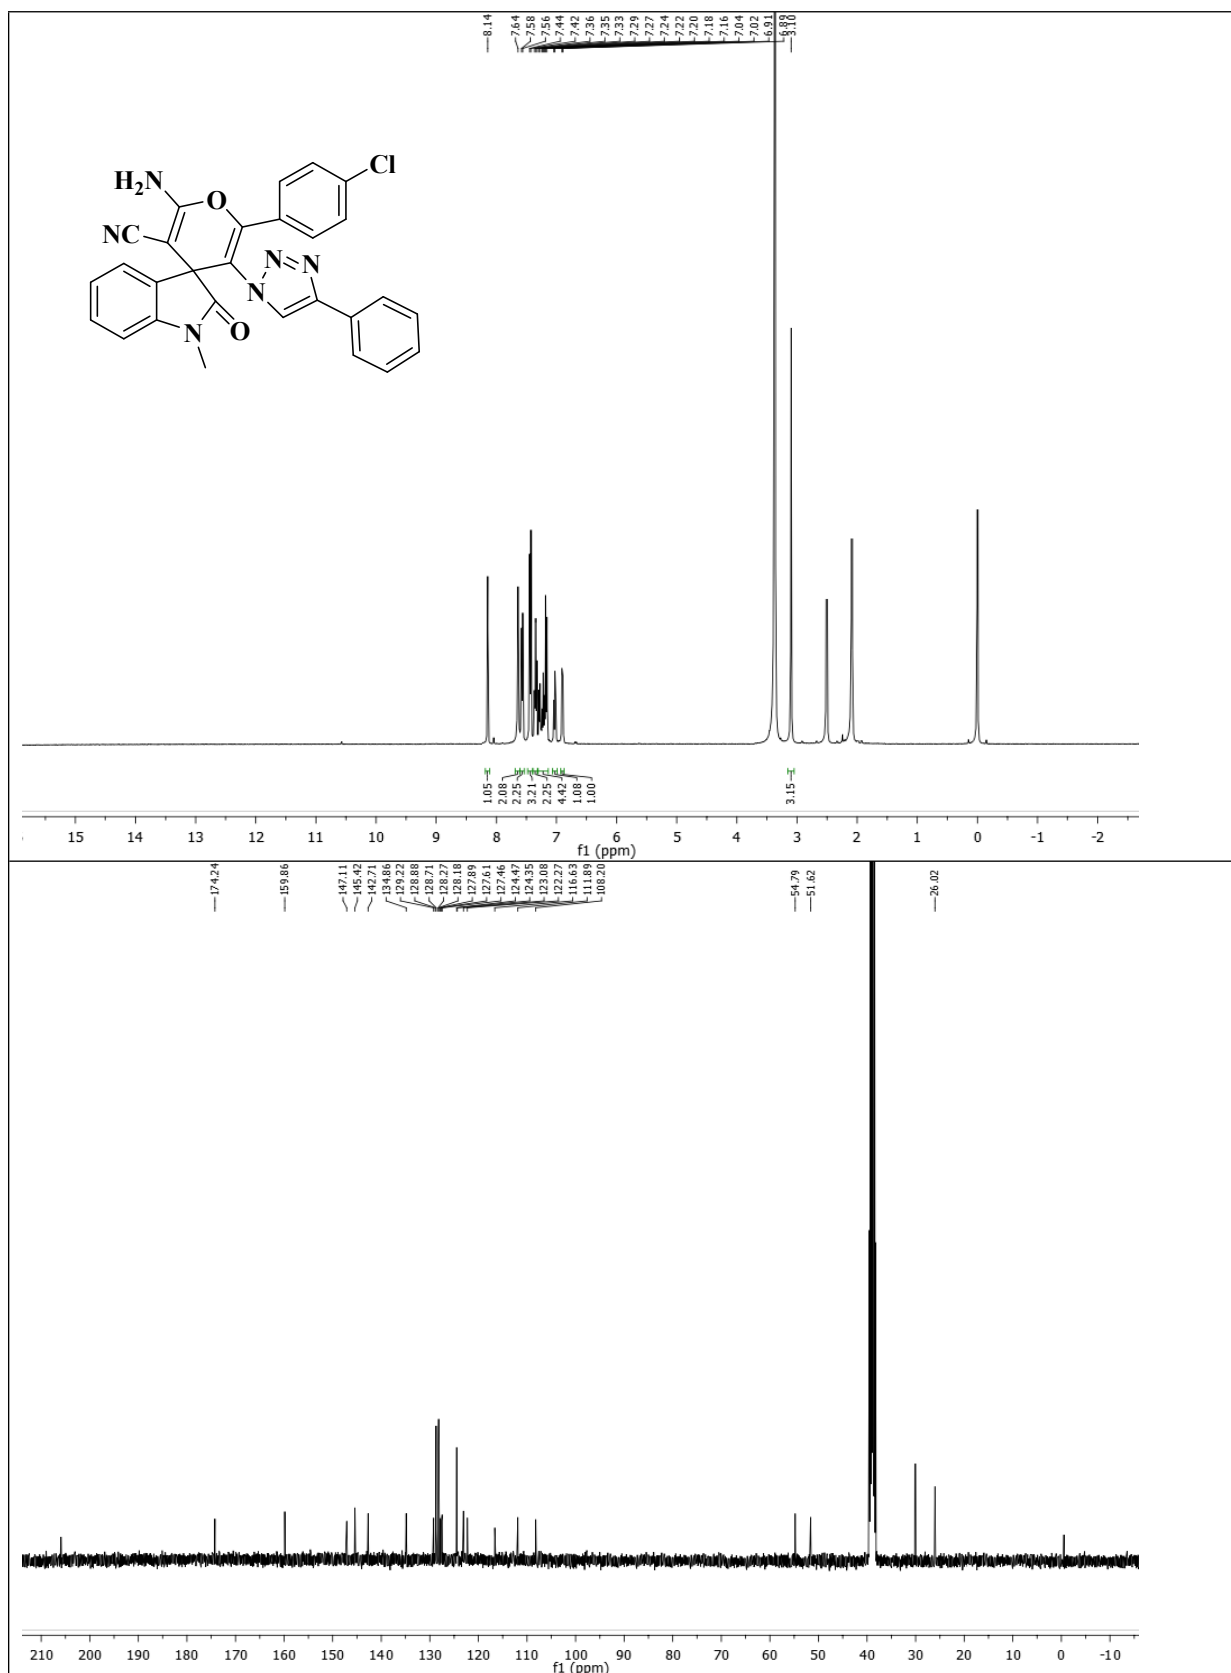

# <sup>1</sup>H and <sup>13</sup>C NMR Spectra of Compound 5u

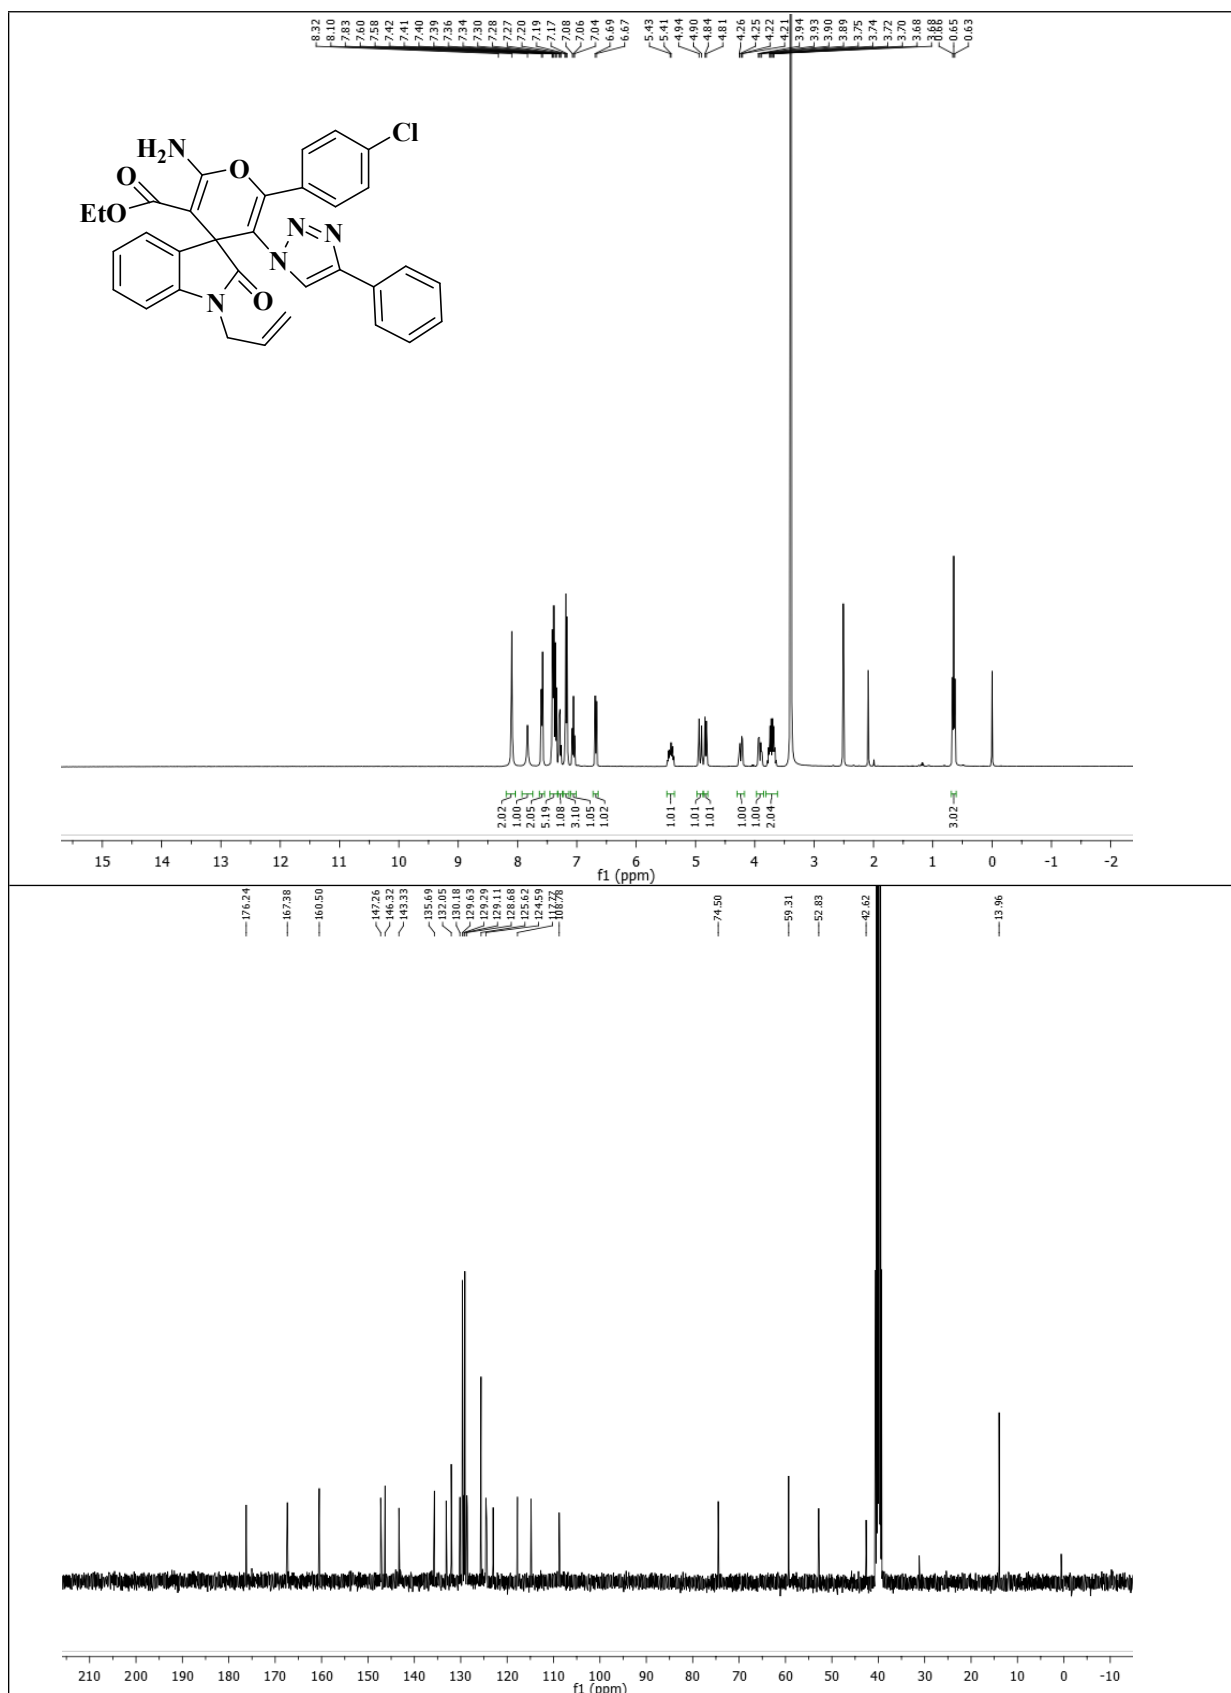

# <sup>1</sup>H and <sup>13</sup>C NMR Spectra of Compound 5v

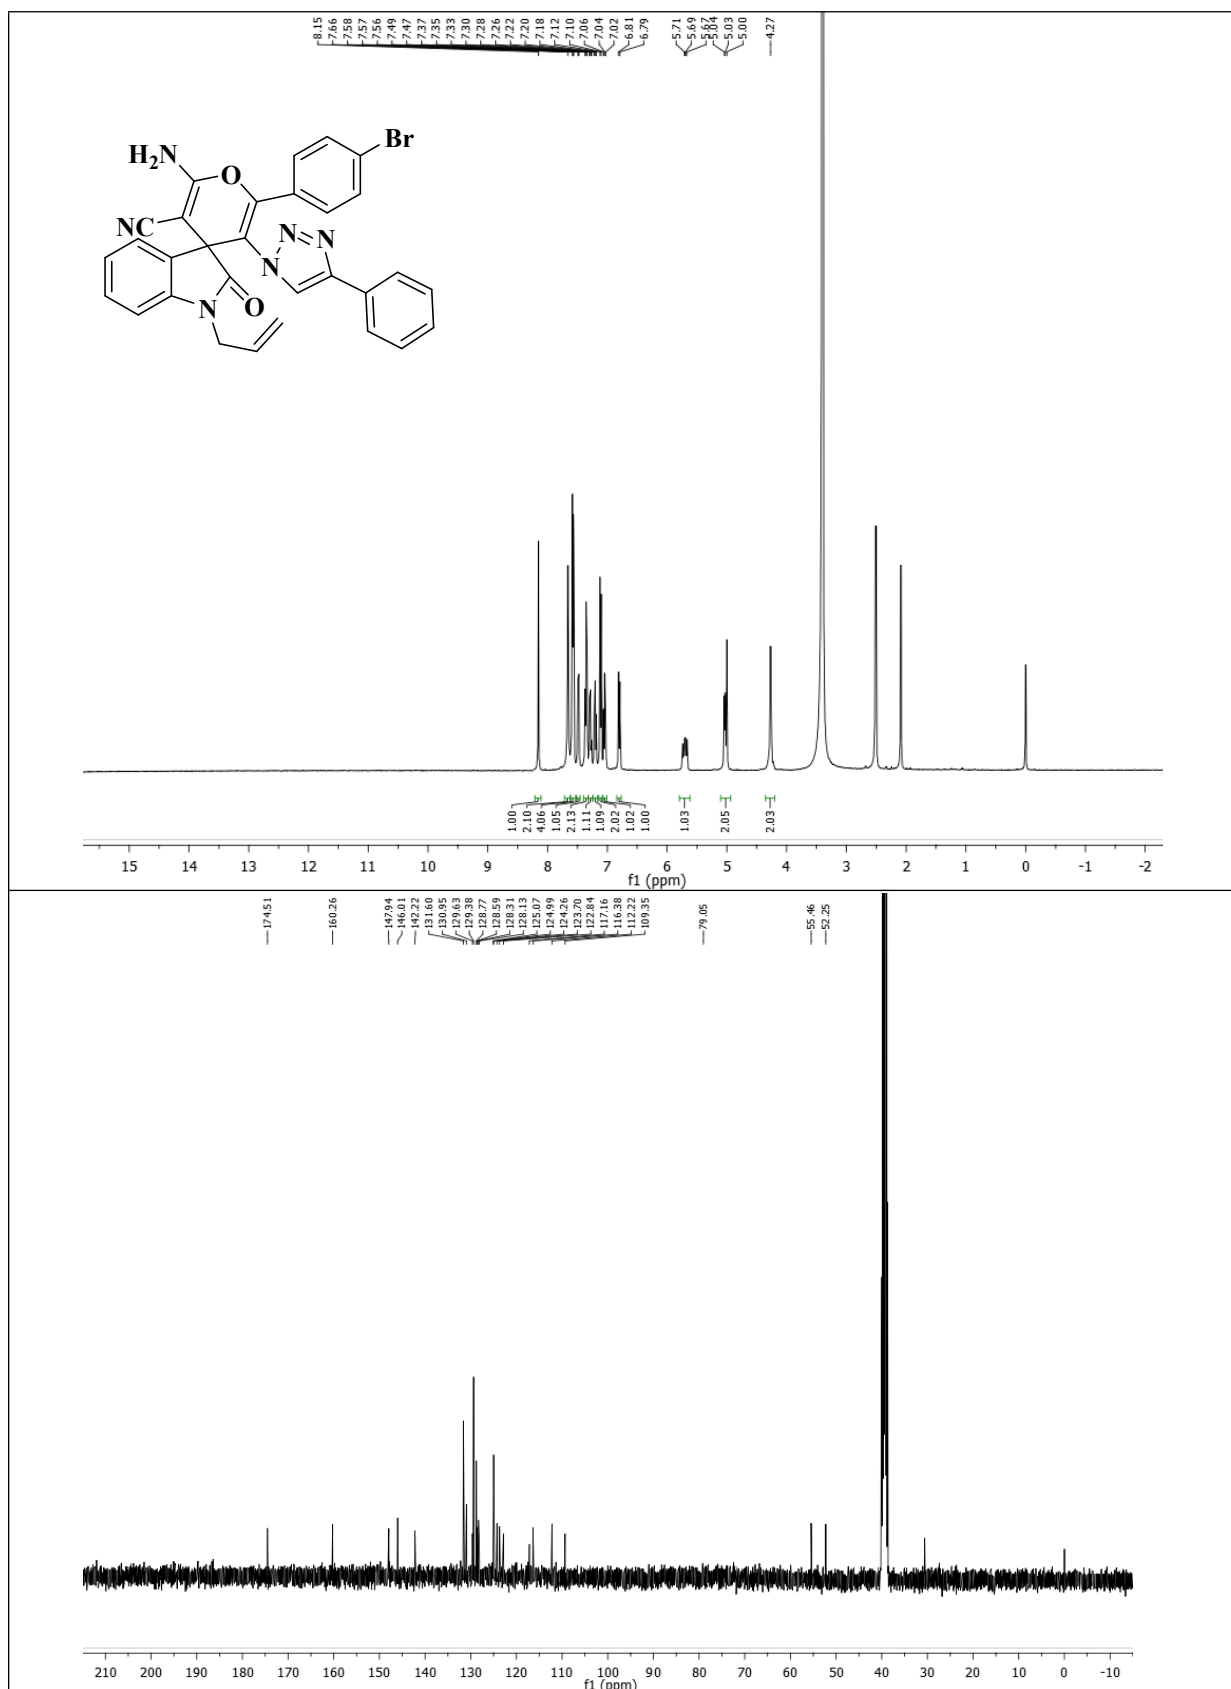

# $^1\text{H}$ and $^{13}\text{C}$ NMR Spectra of Compound 5w

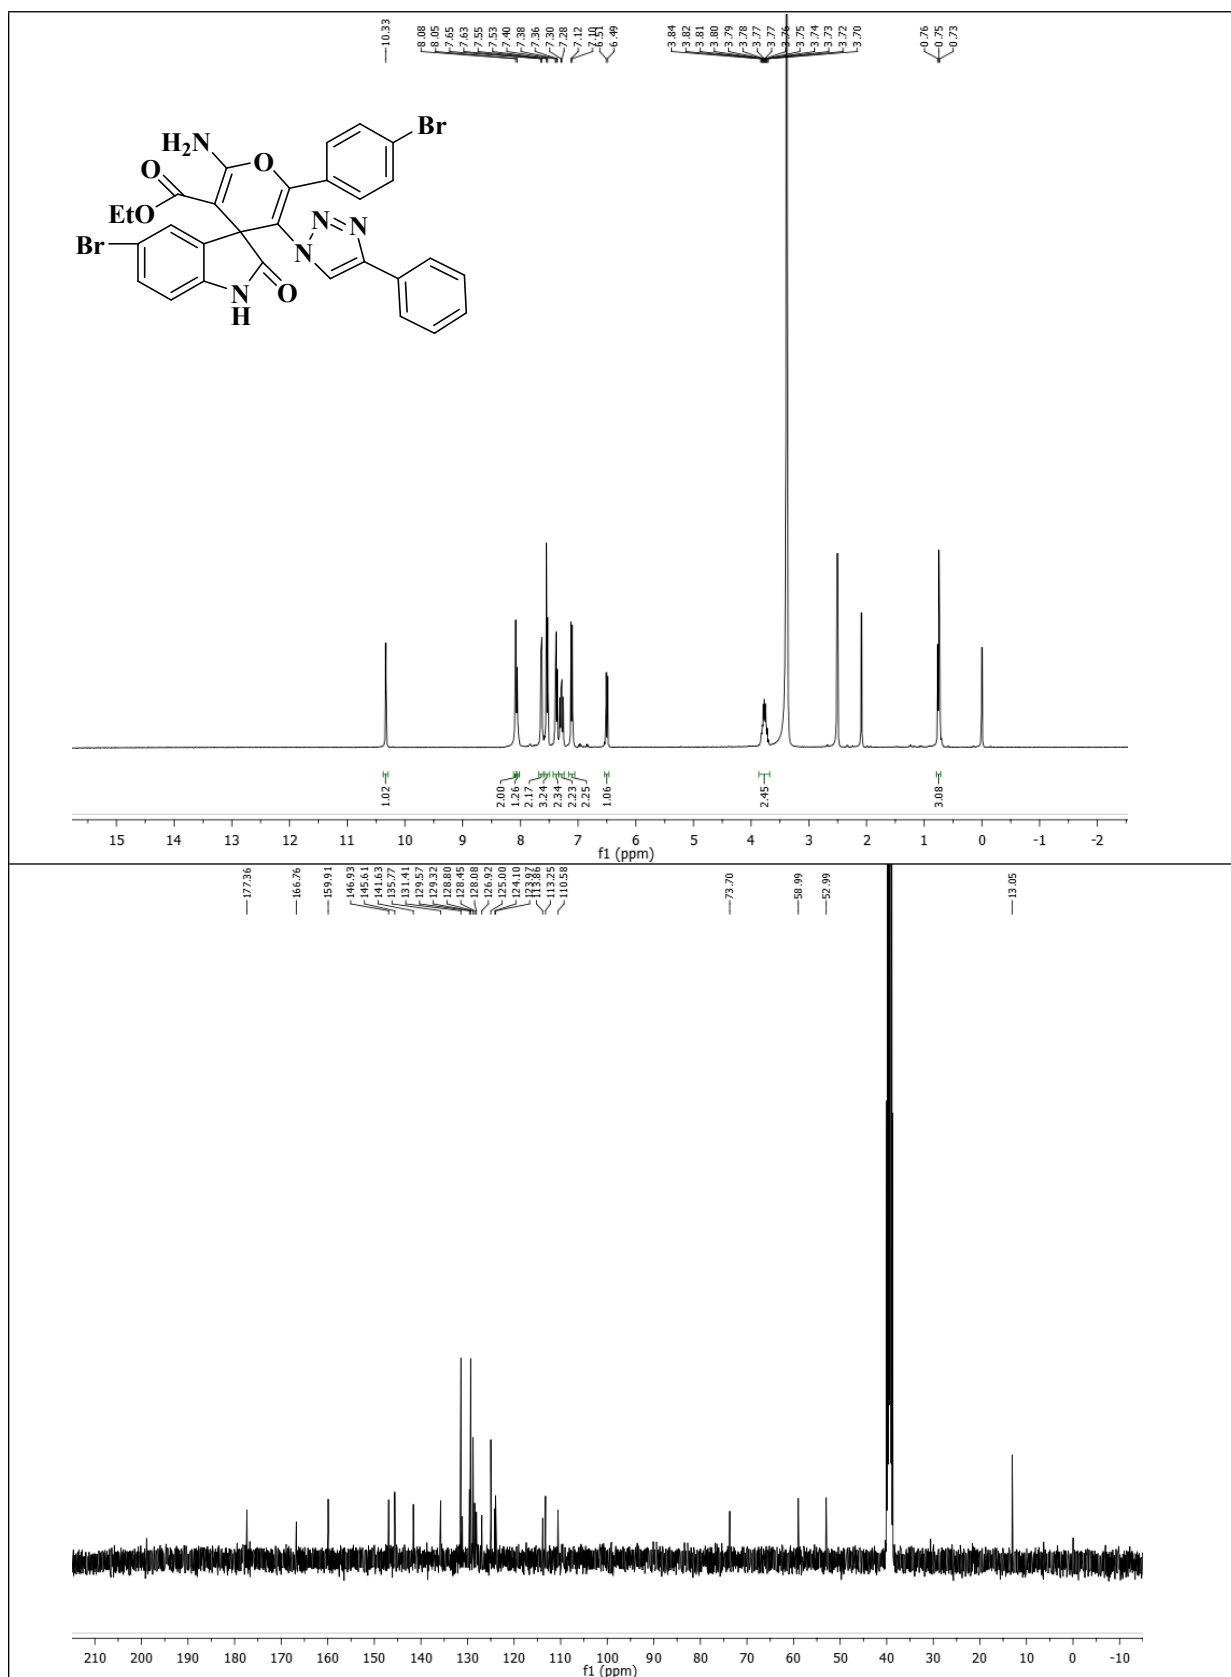



# <sup>1</sup>H and <sup>13</sup>C NMR Spectra of Compound 5x

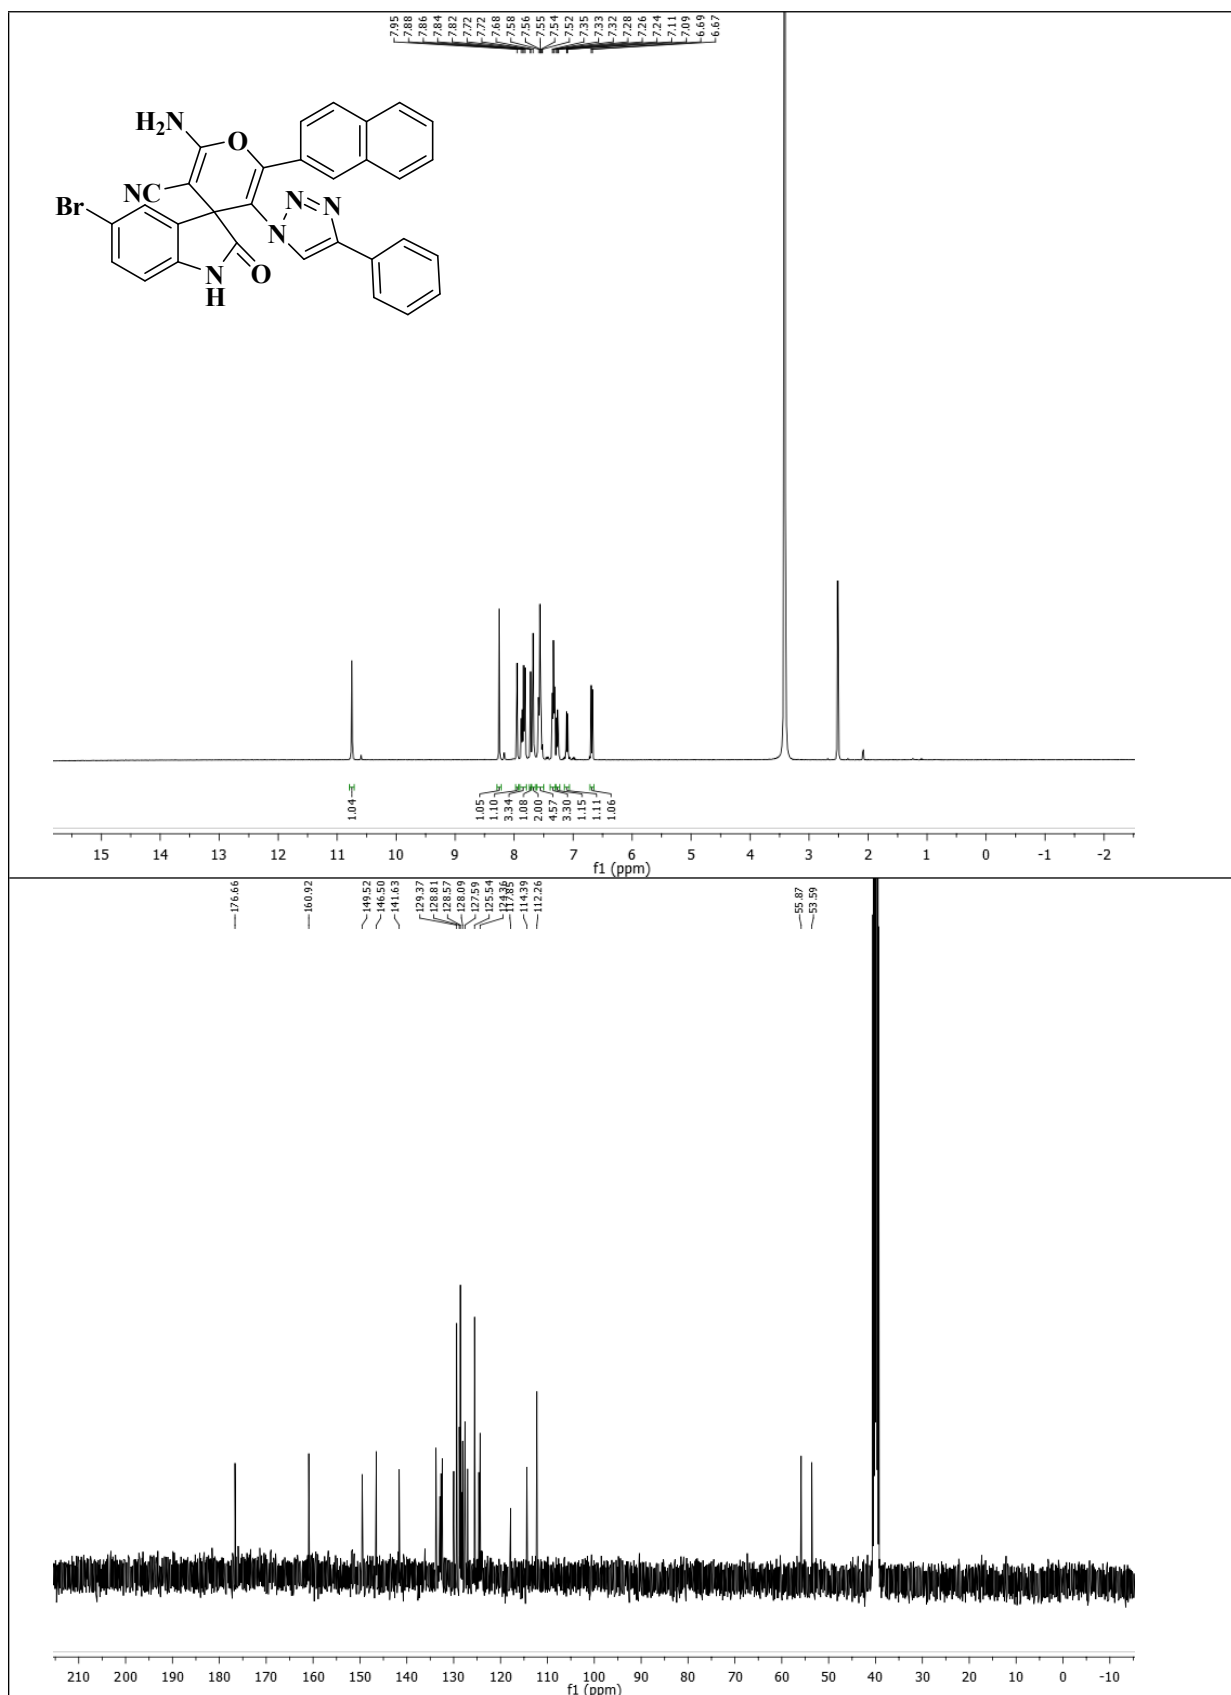



# <sup>1</sup>H and <sup>13</sup>C NMR Spectra of Compound 5y

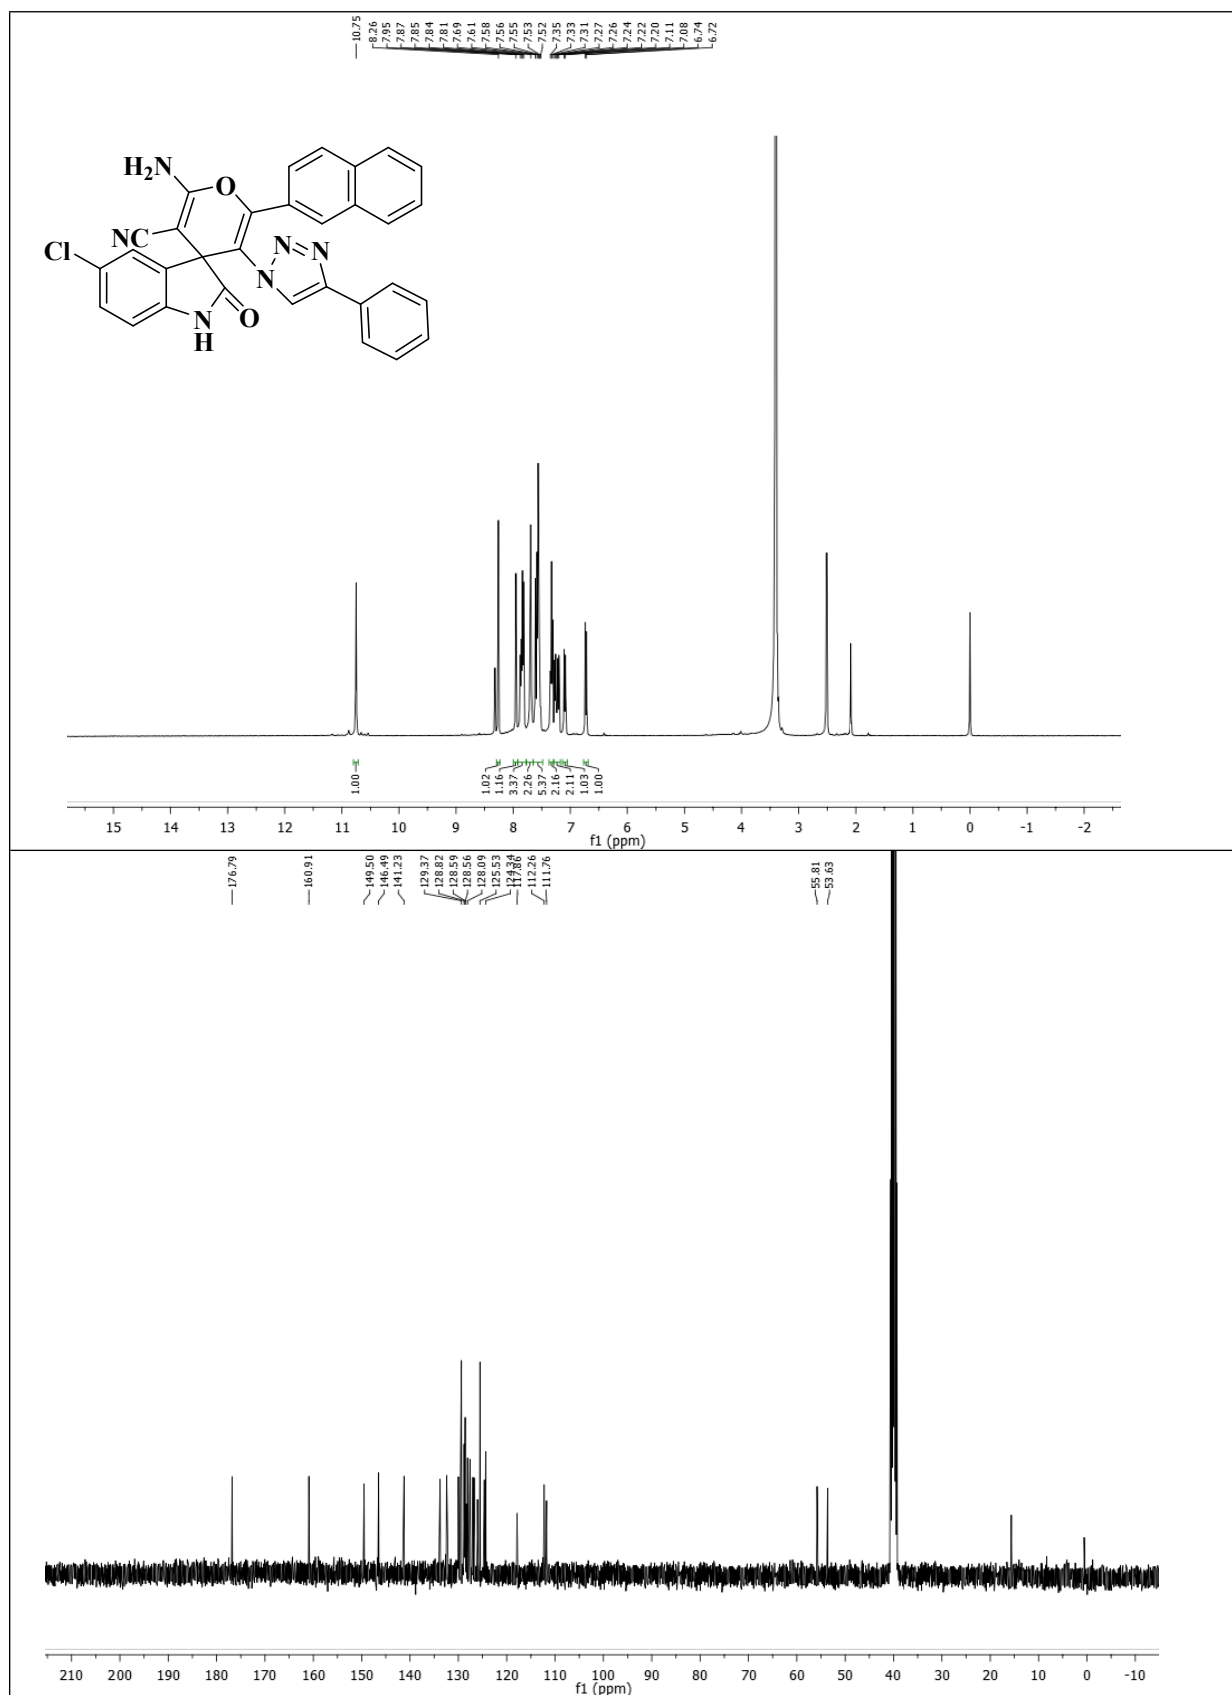

# <sup>1</sup>H and <sup>13</sup>C NMR Spectra of Compound 5z

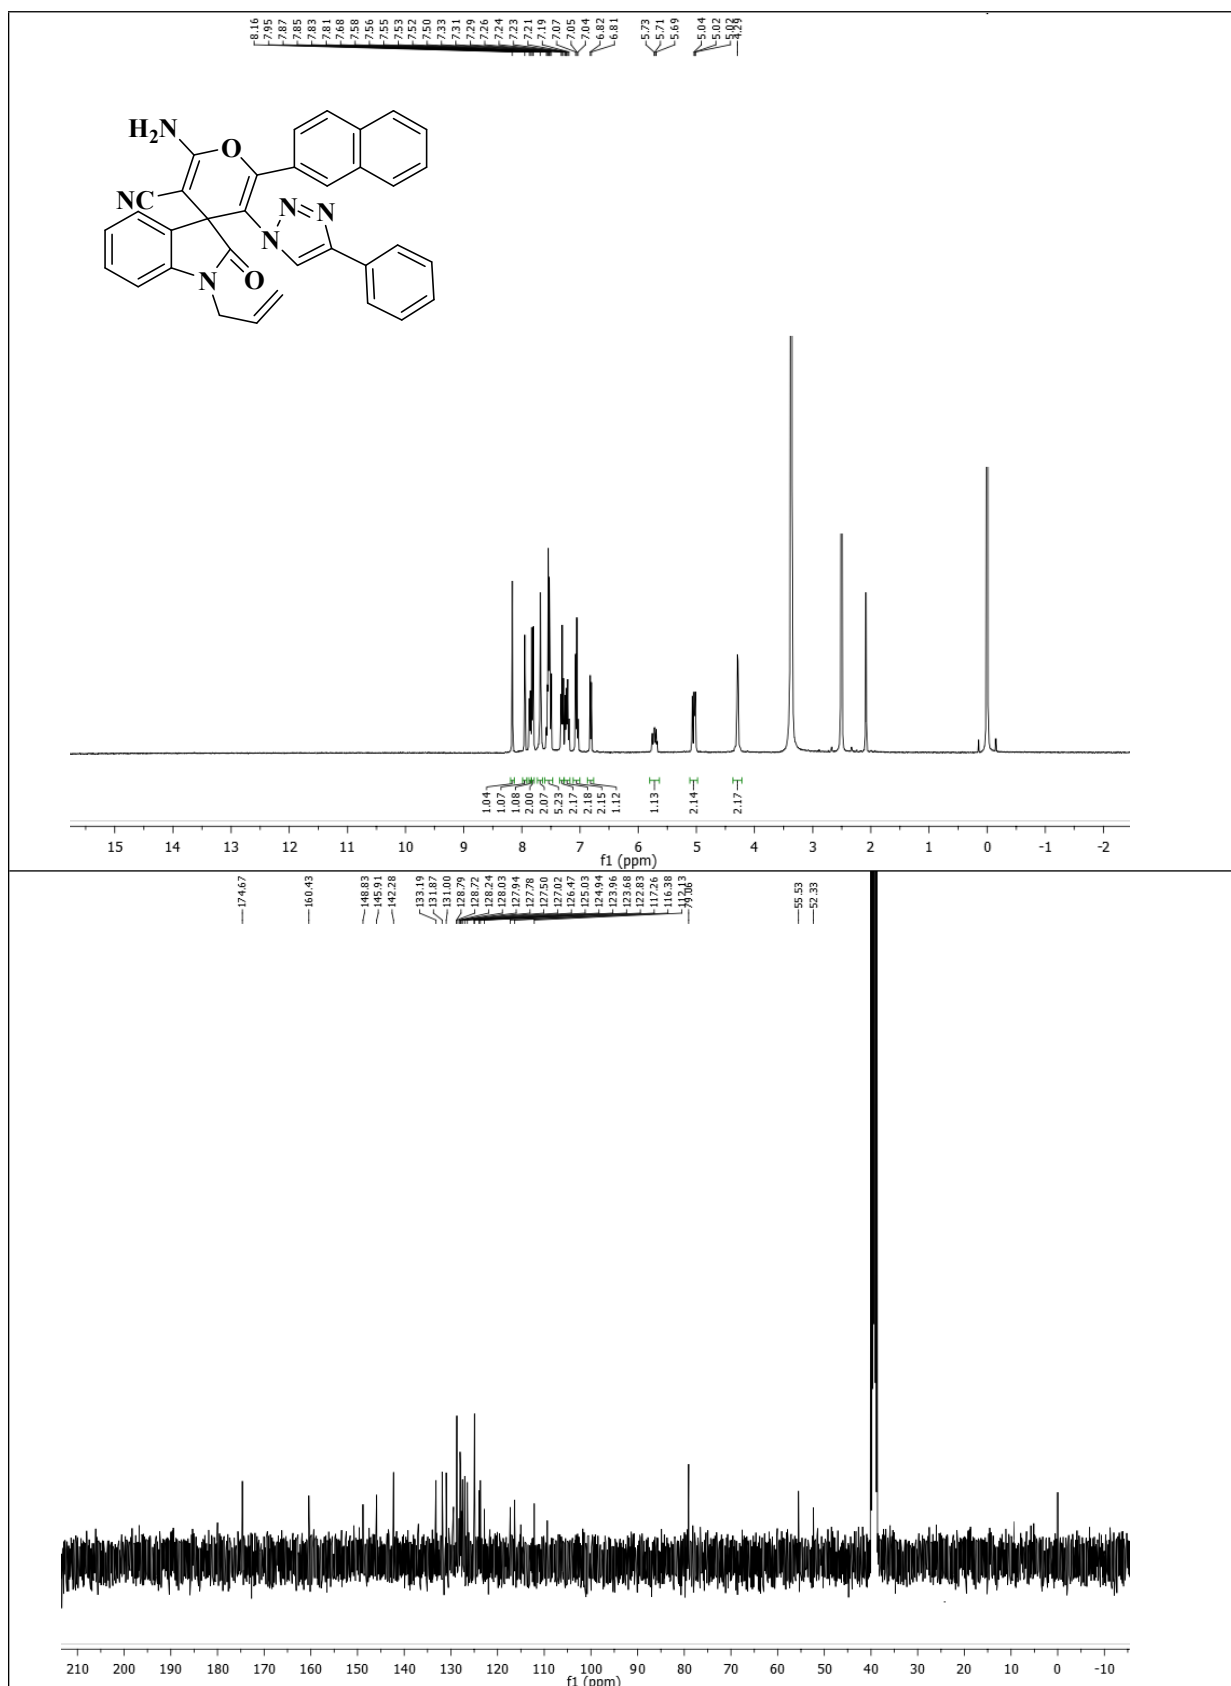

# <sup>1</sup>H and <sup>13</sup>C NMR Spectra of Compound 5aa

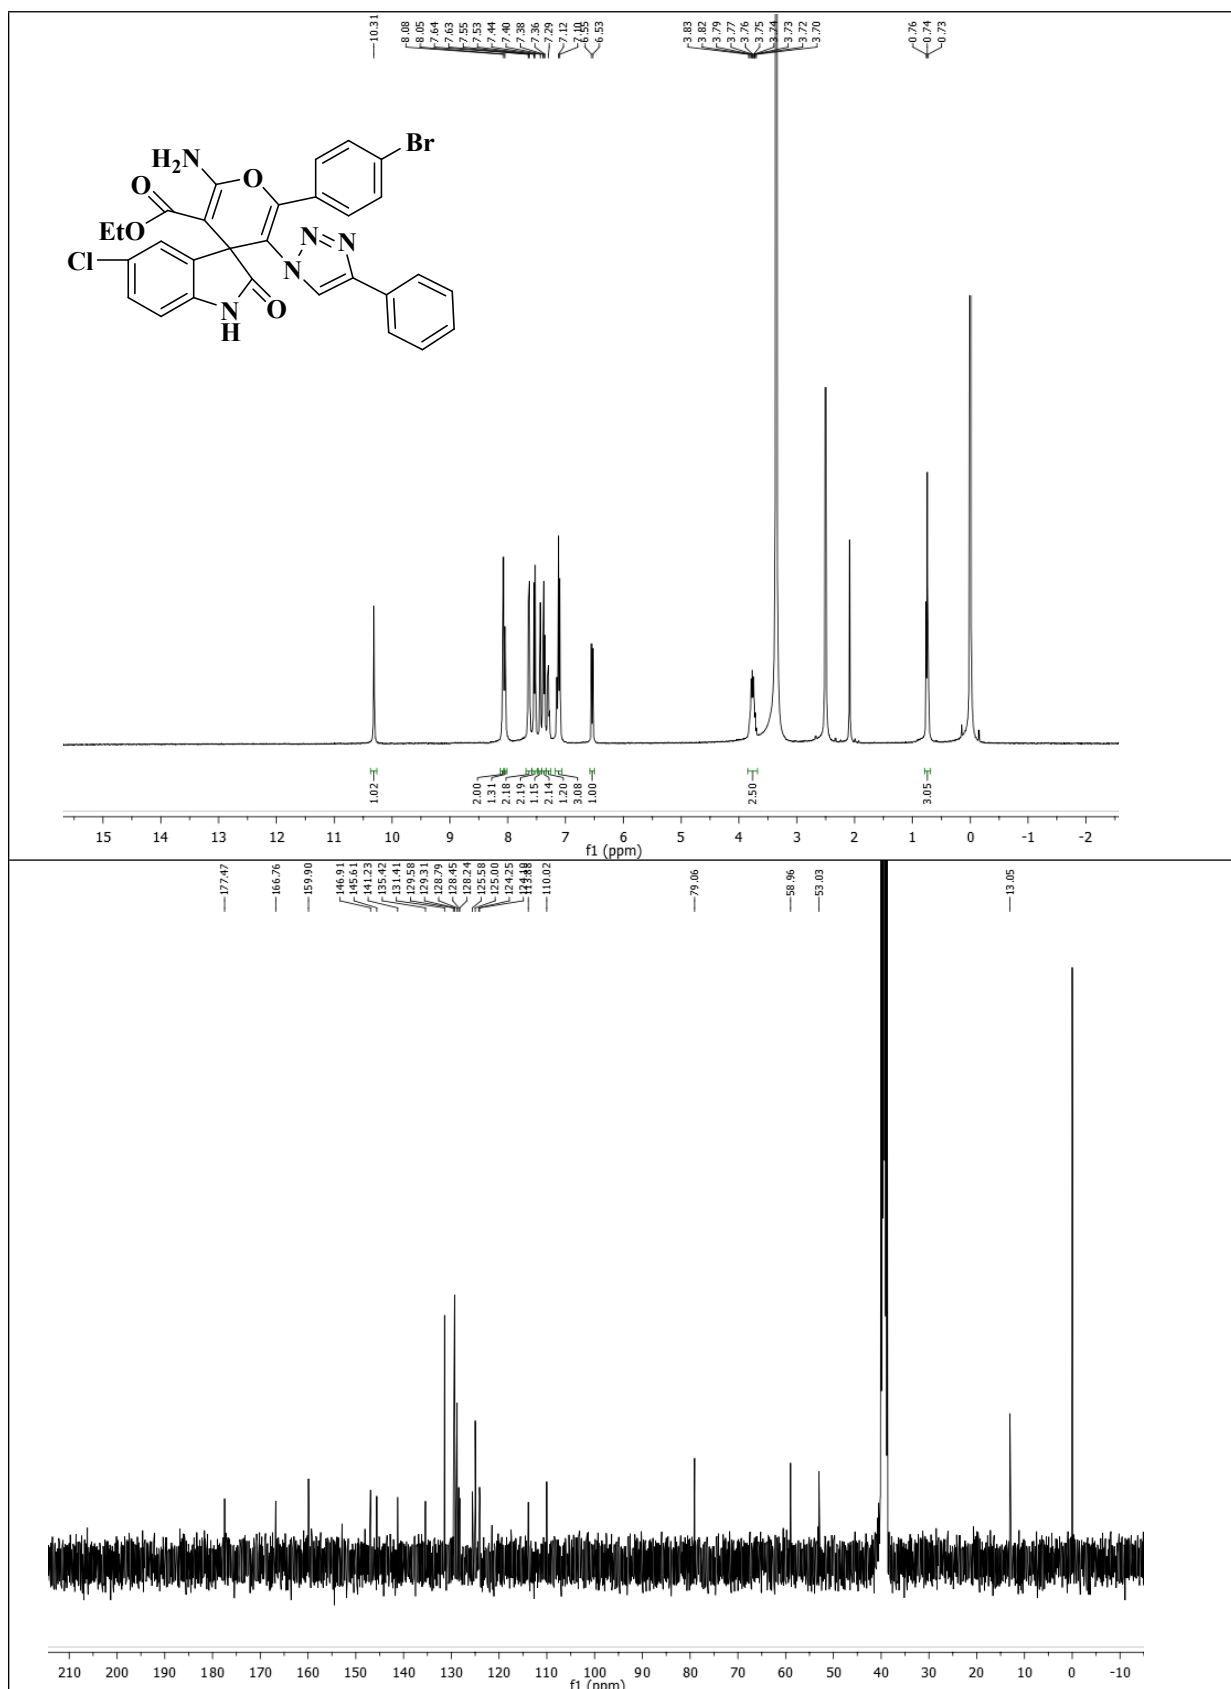

# <sup>1</sup>H and <sup>13</sup>C NMR Spectra of Compound 7a

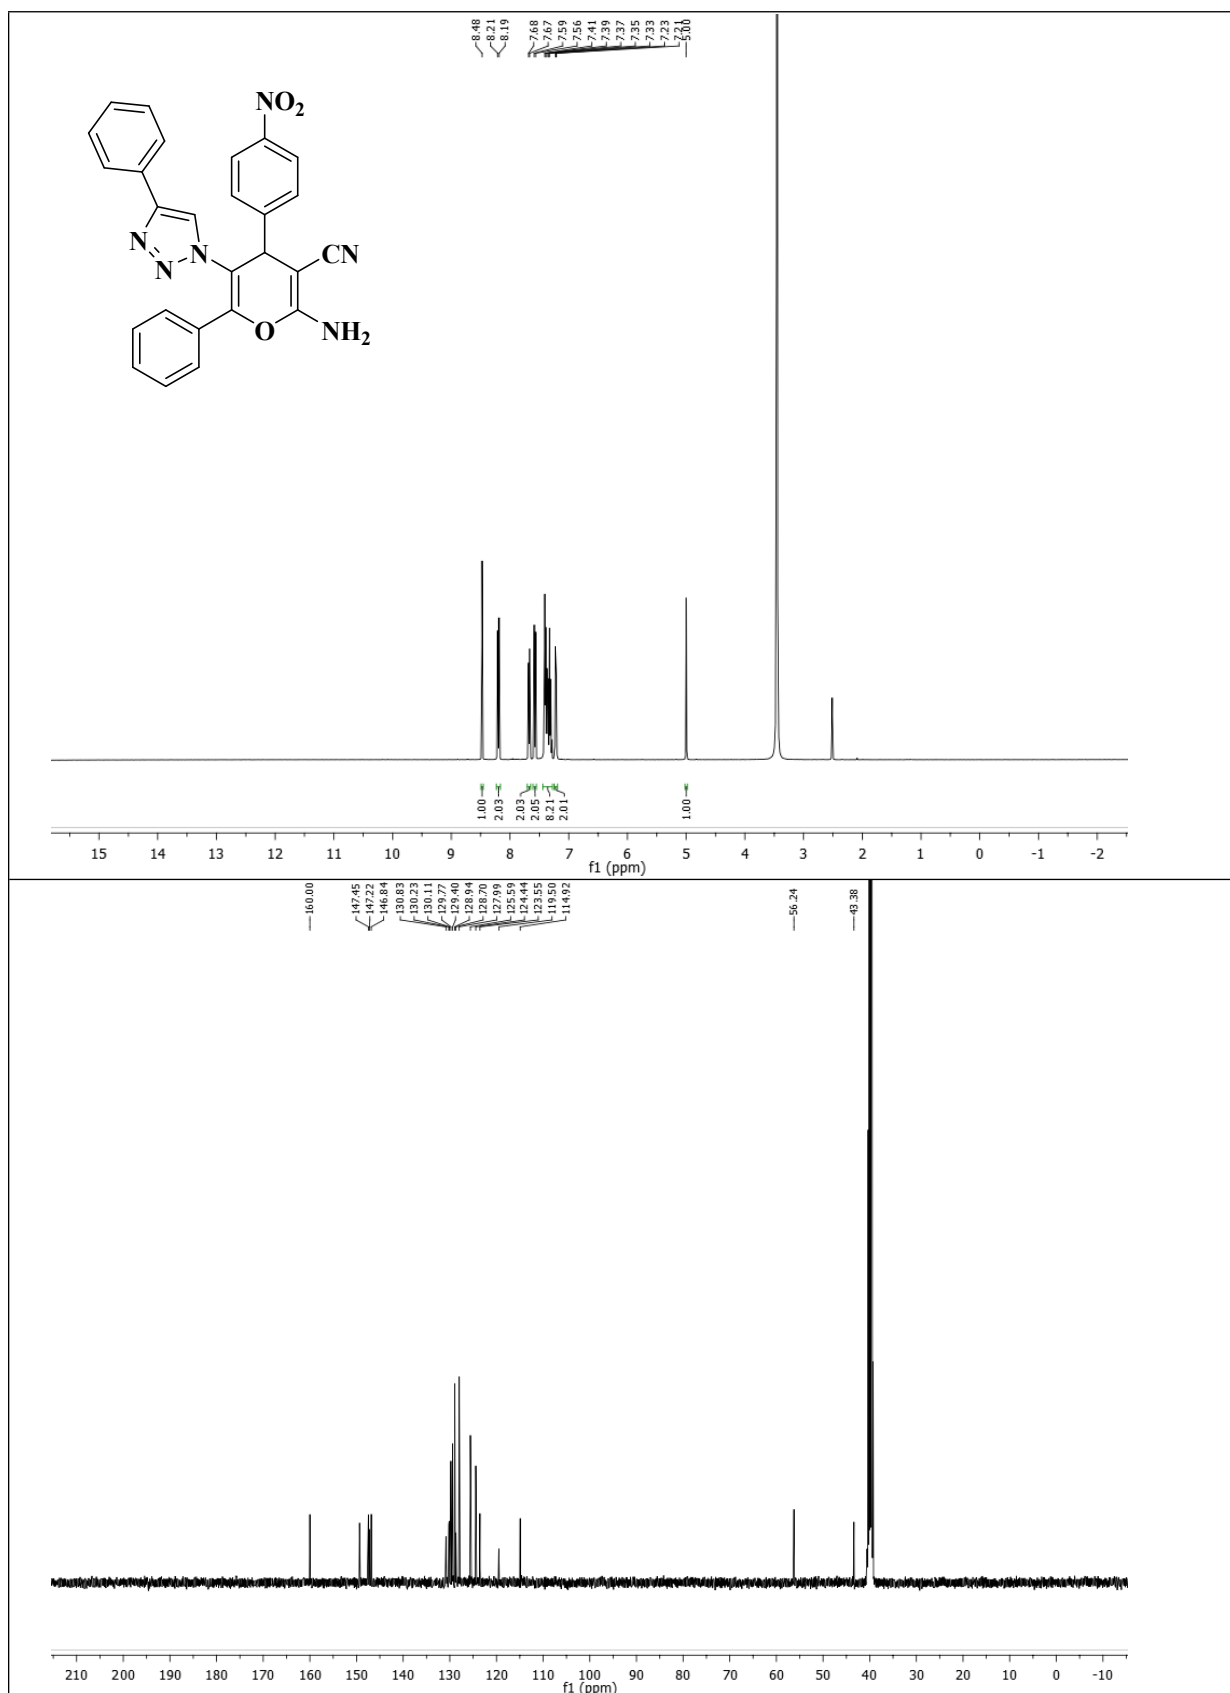

# <sup>1</sup>H and <sup>13</sup>C NMR Spectra of Compound 7b

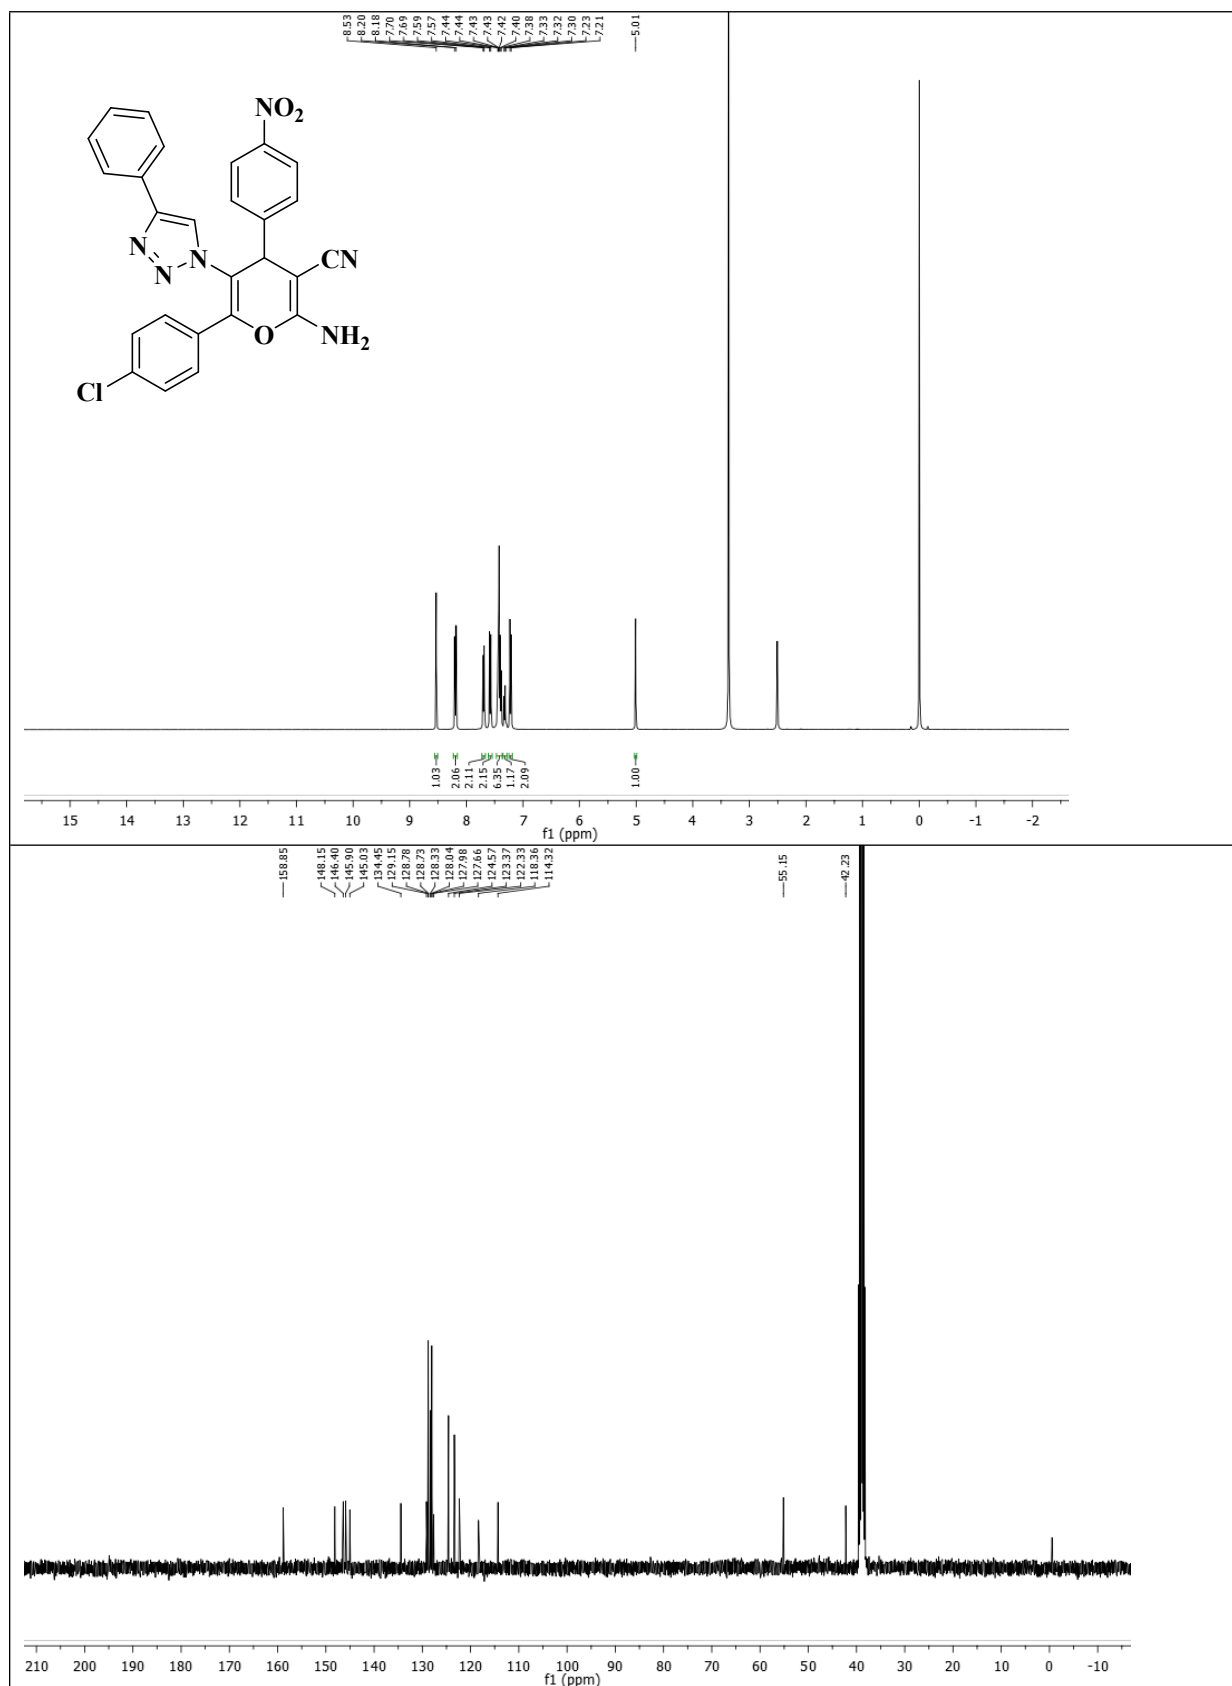

# <sup>1</sup>H and <sup>13</sup>C NMR Spectra of Compound 7c

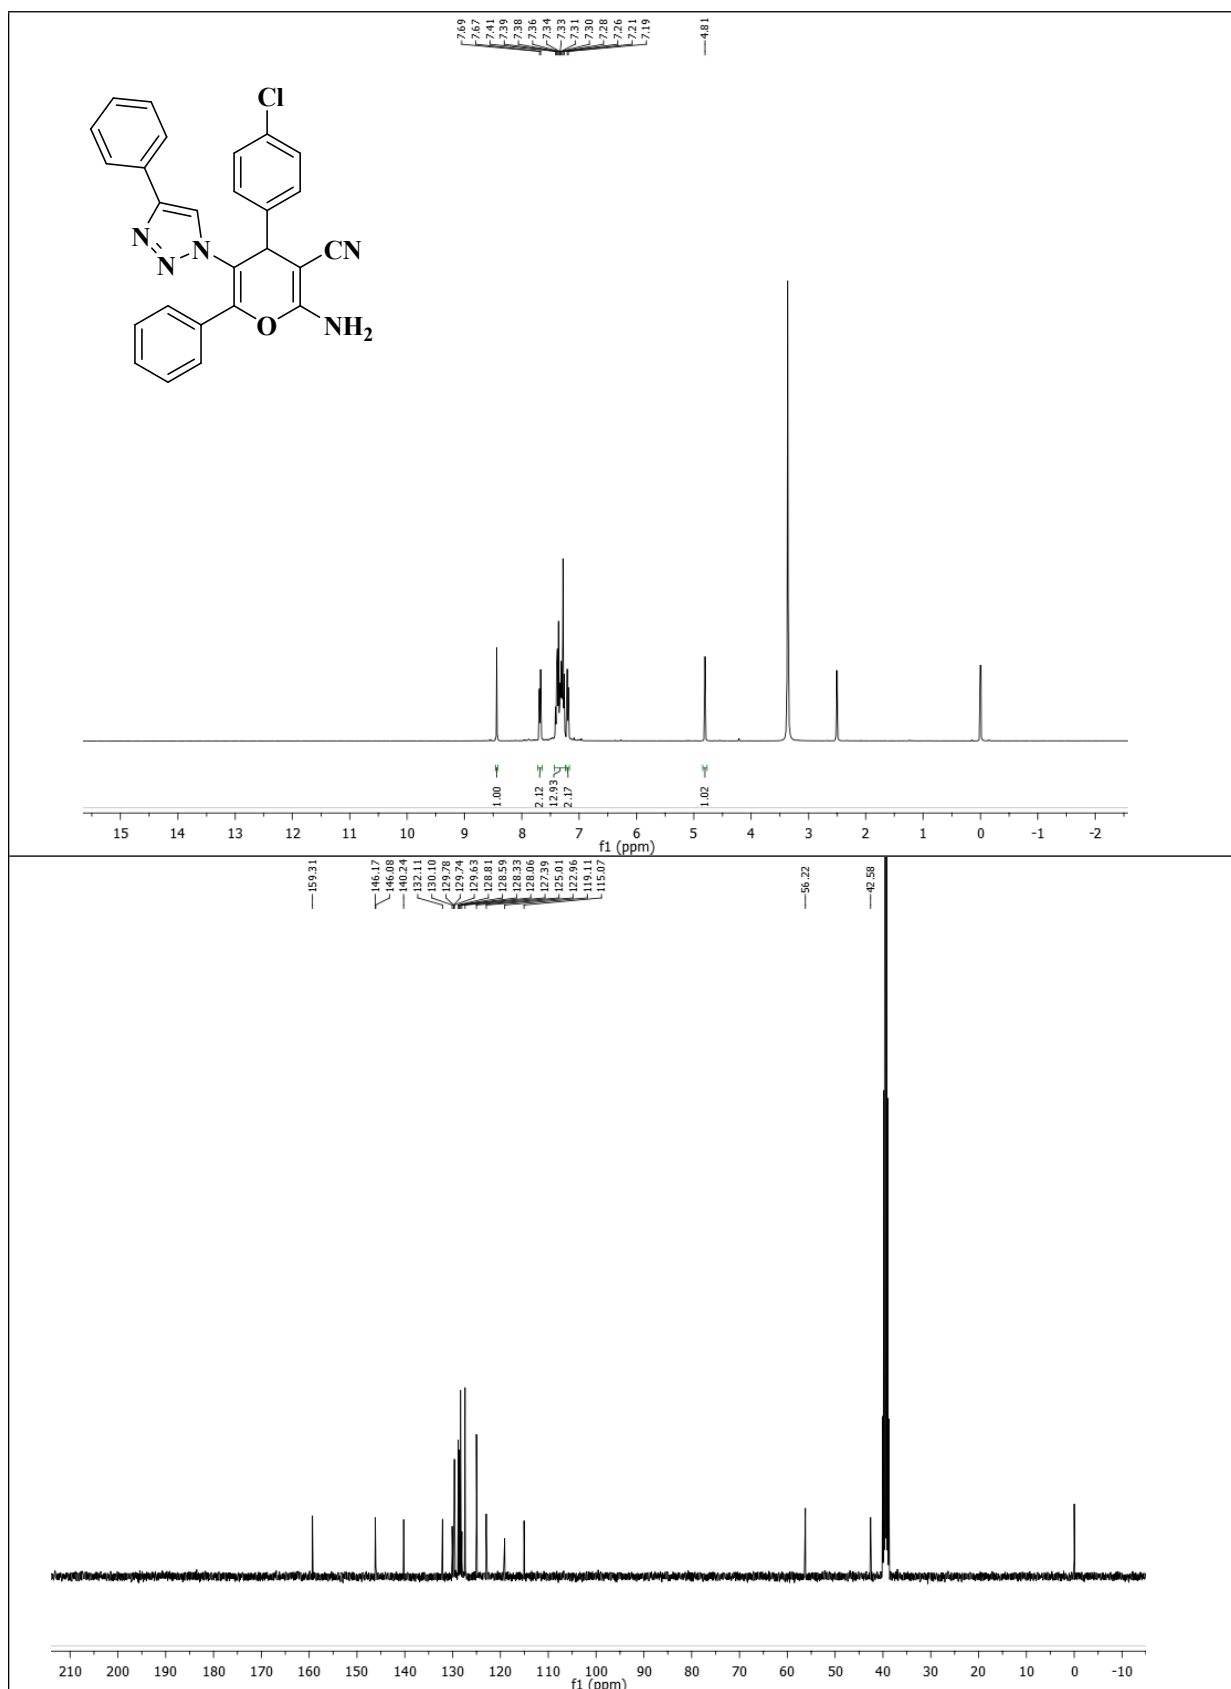



# <sup>1</sup>H and <sup>13</sup>C NMR Spectra of Compound 7d

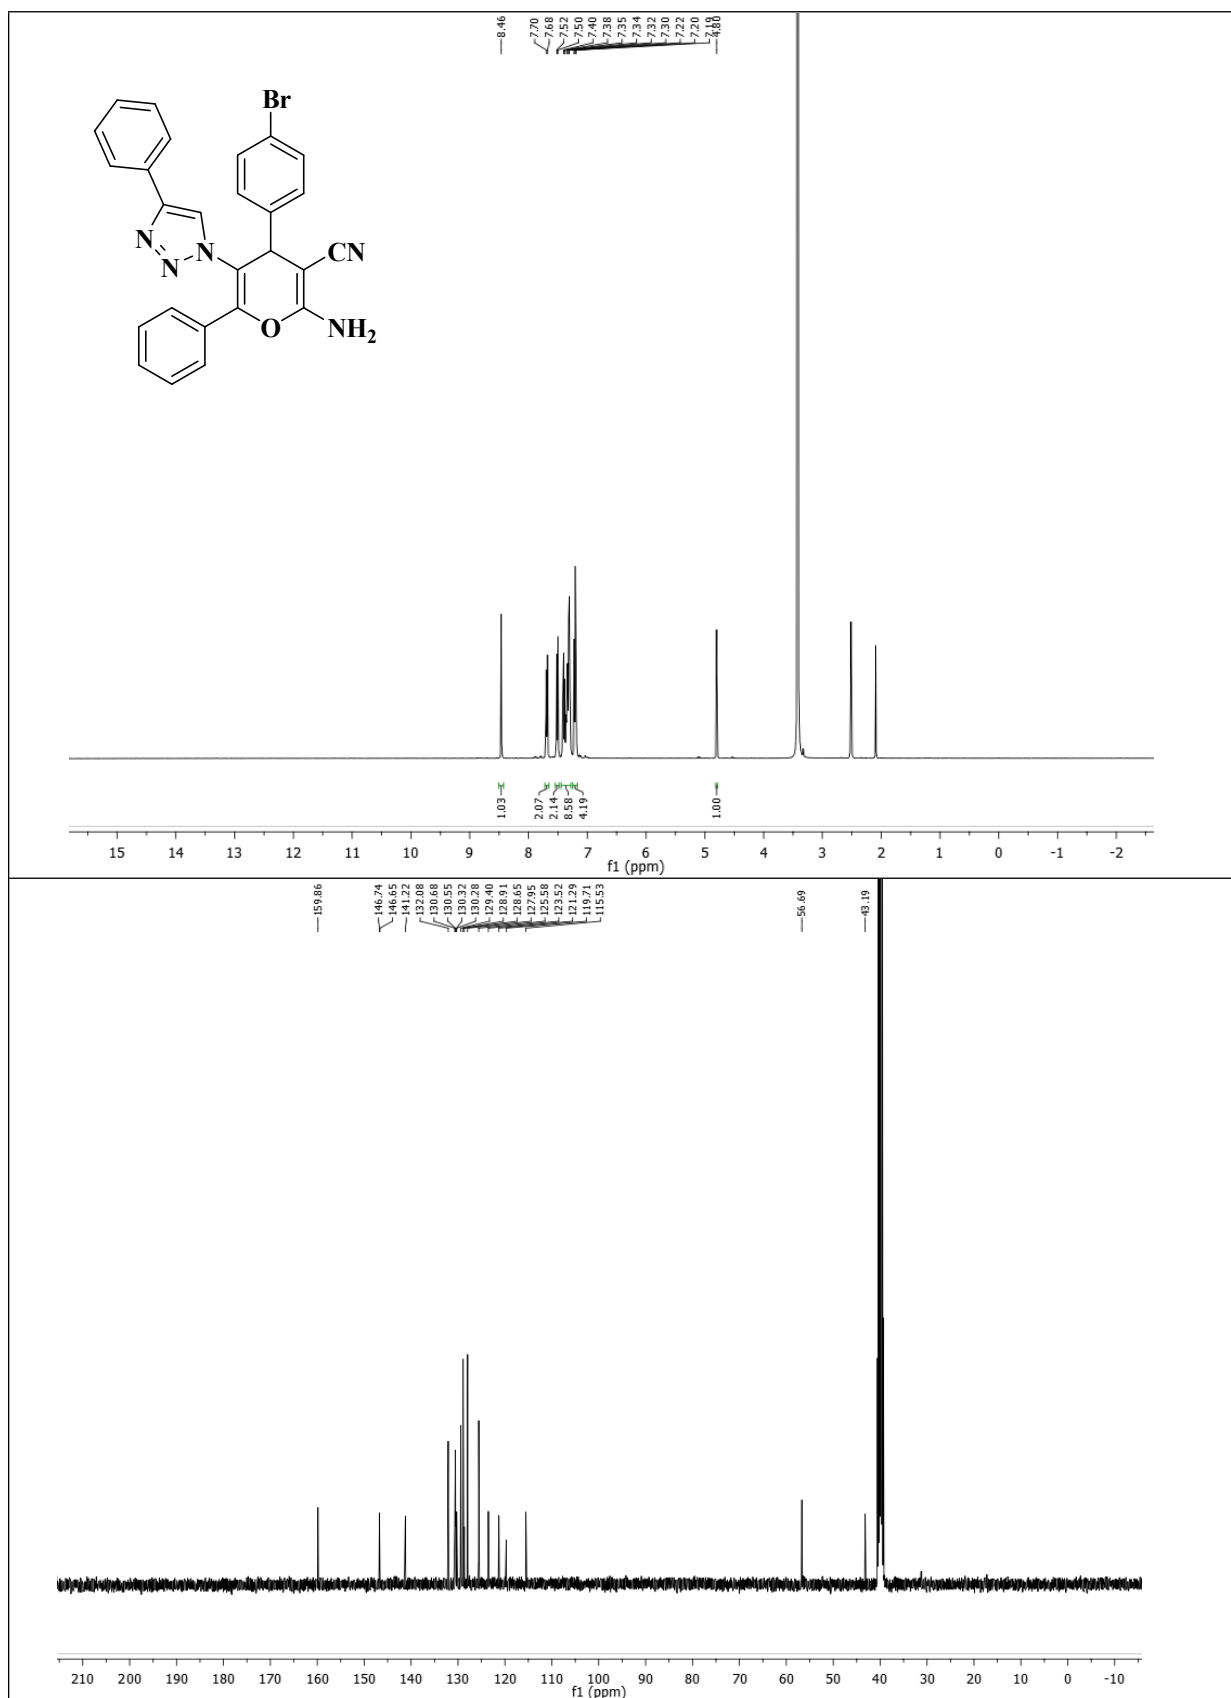



# <sup>1</sup>H and <sup>13</sup>C NMR Spectra of Compound 7e

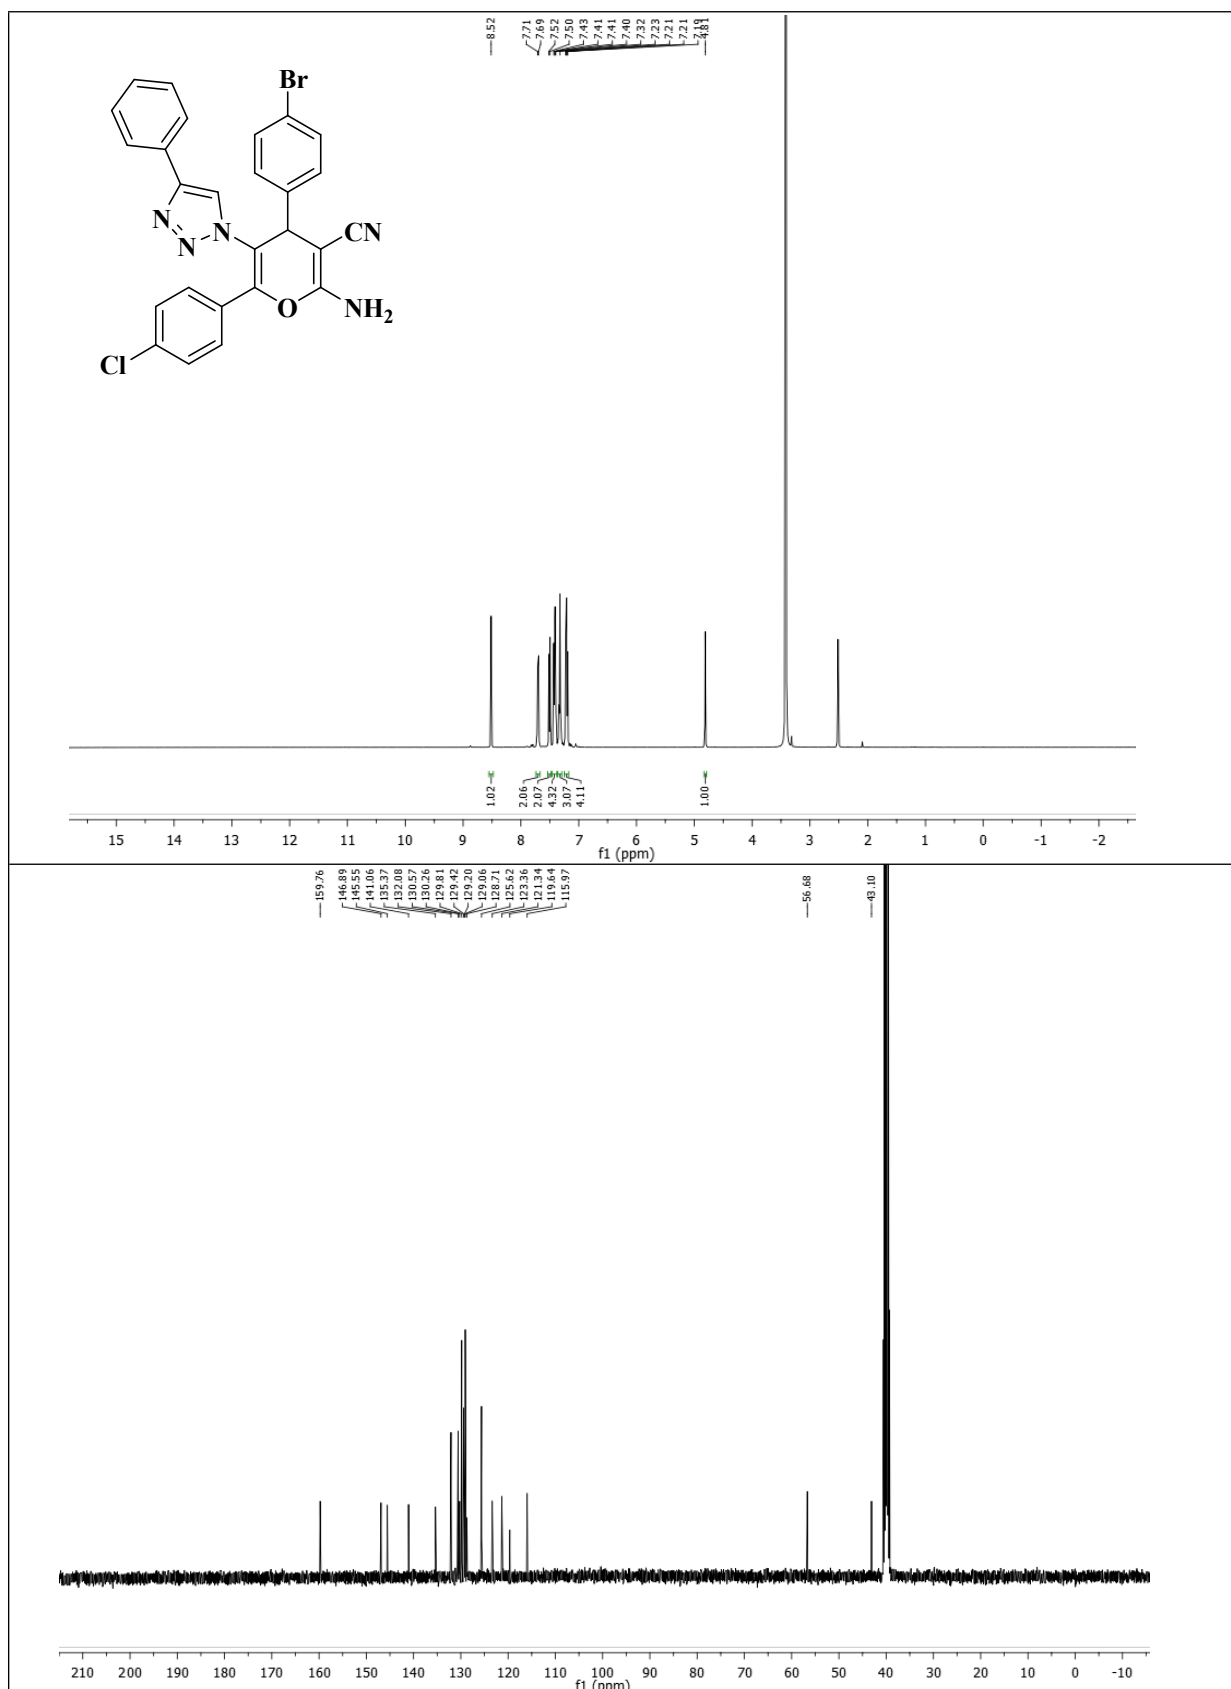

# <sup>1</sup>H and <sup>13</sup>C NMR Spectra of Compound 7f

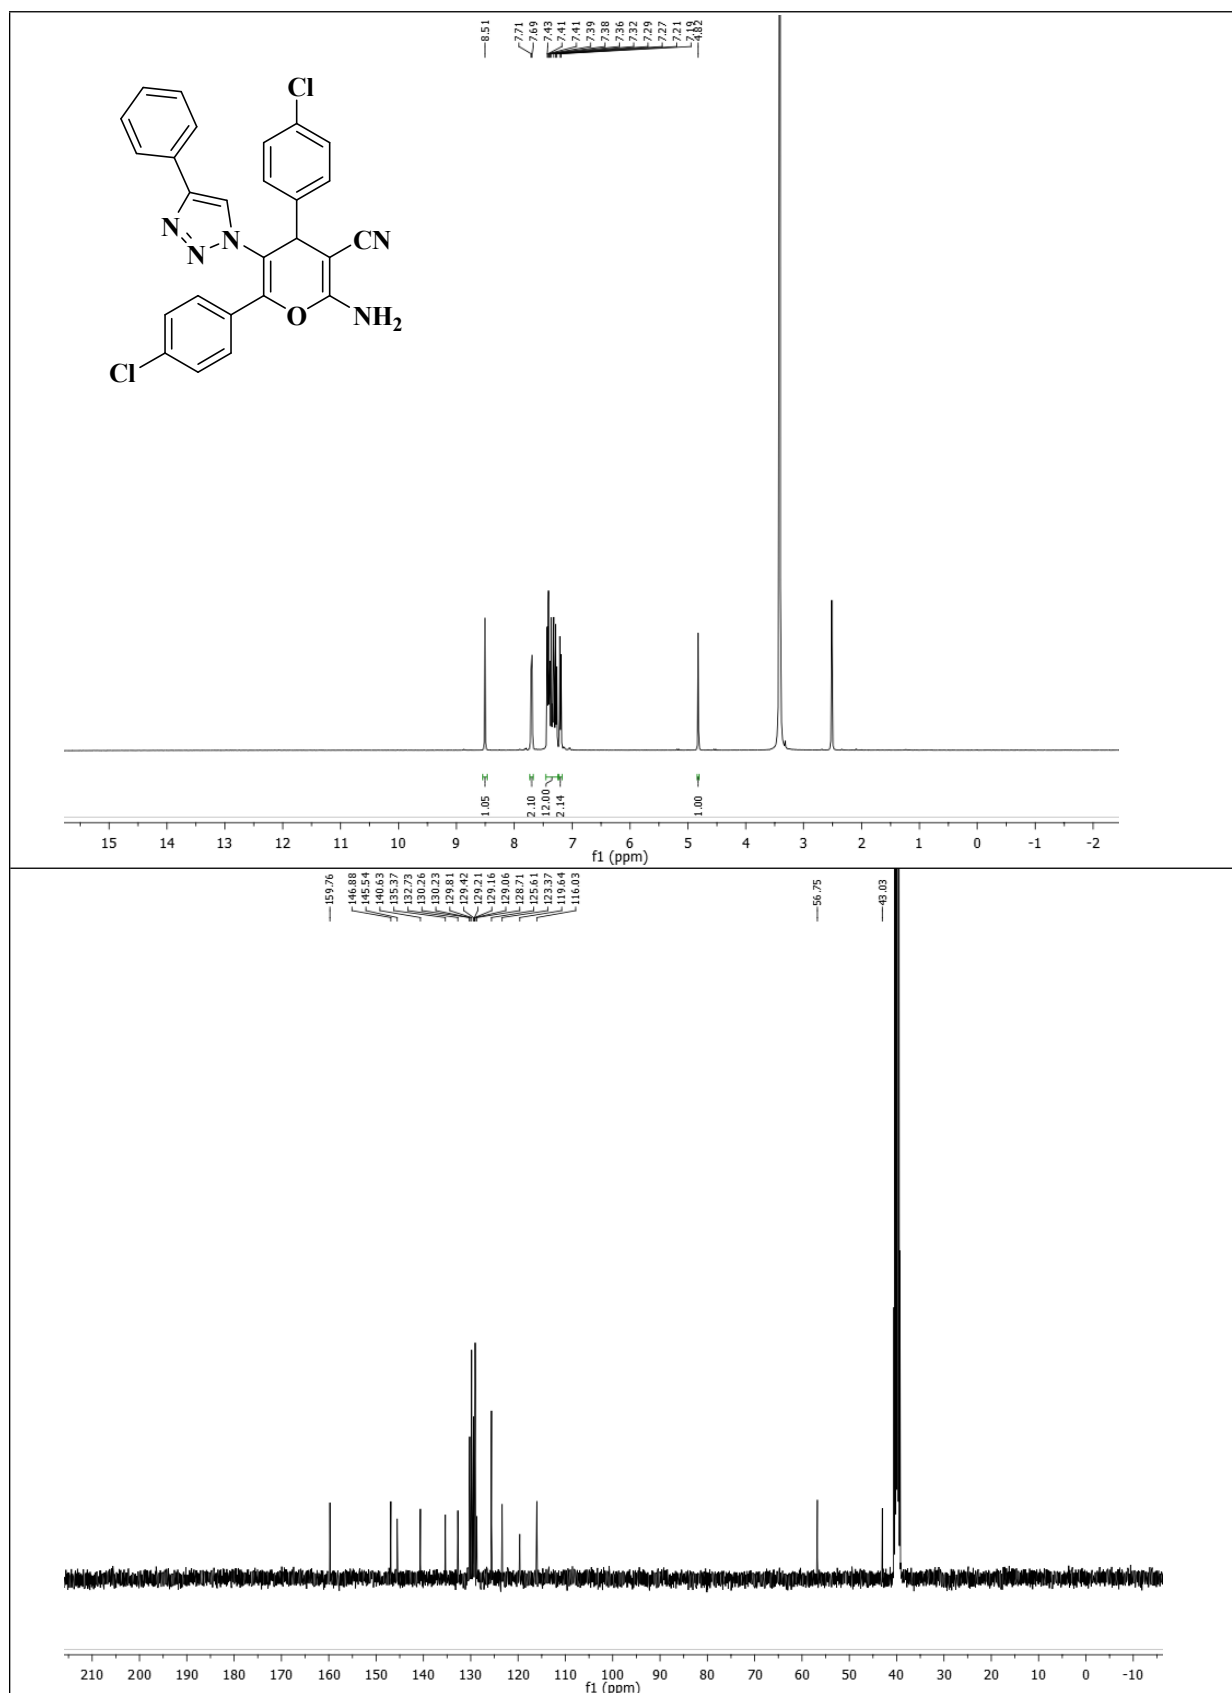

# <sup>1</sup>H and <sup>13</sup>C NMR Spectra of Compound 7g

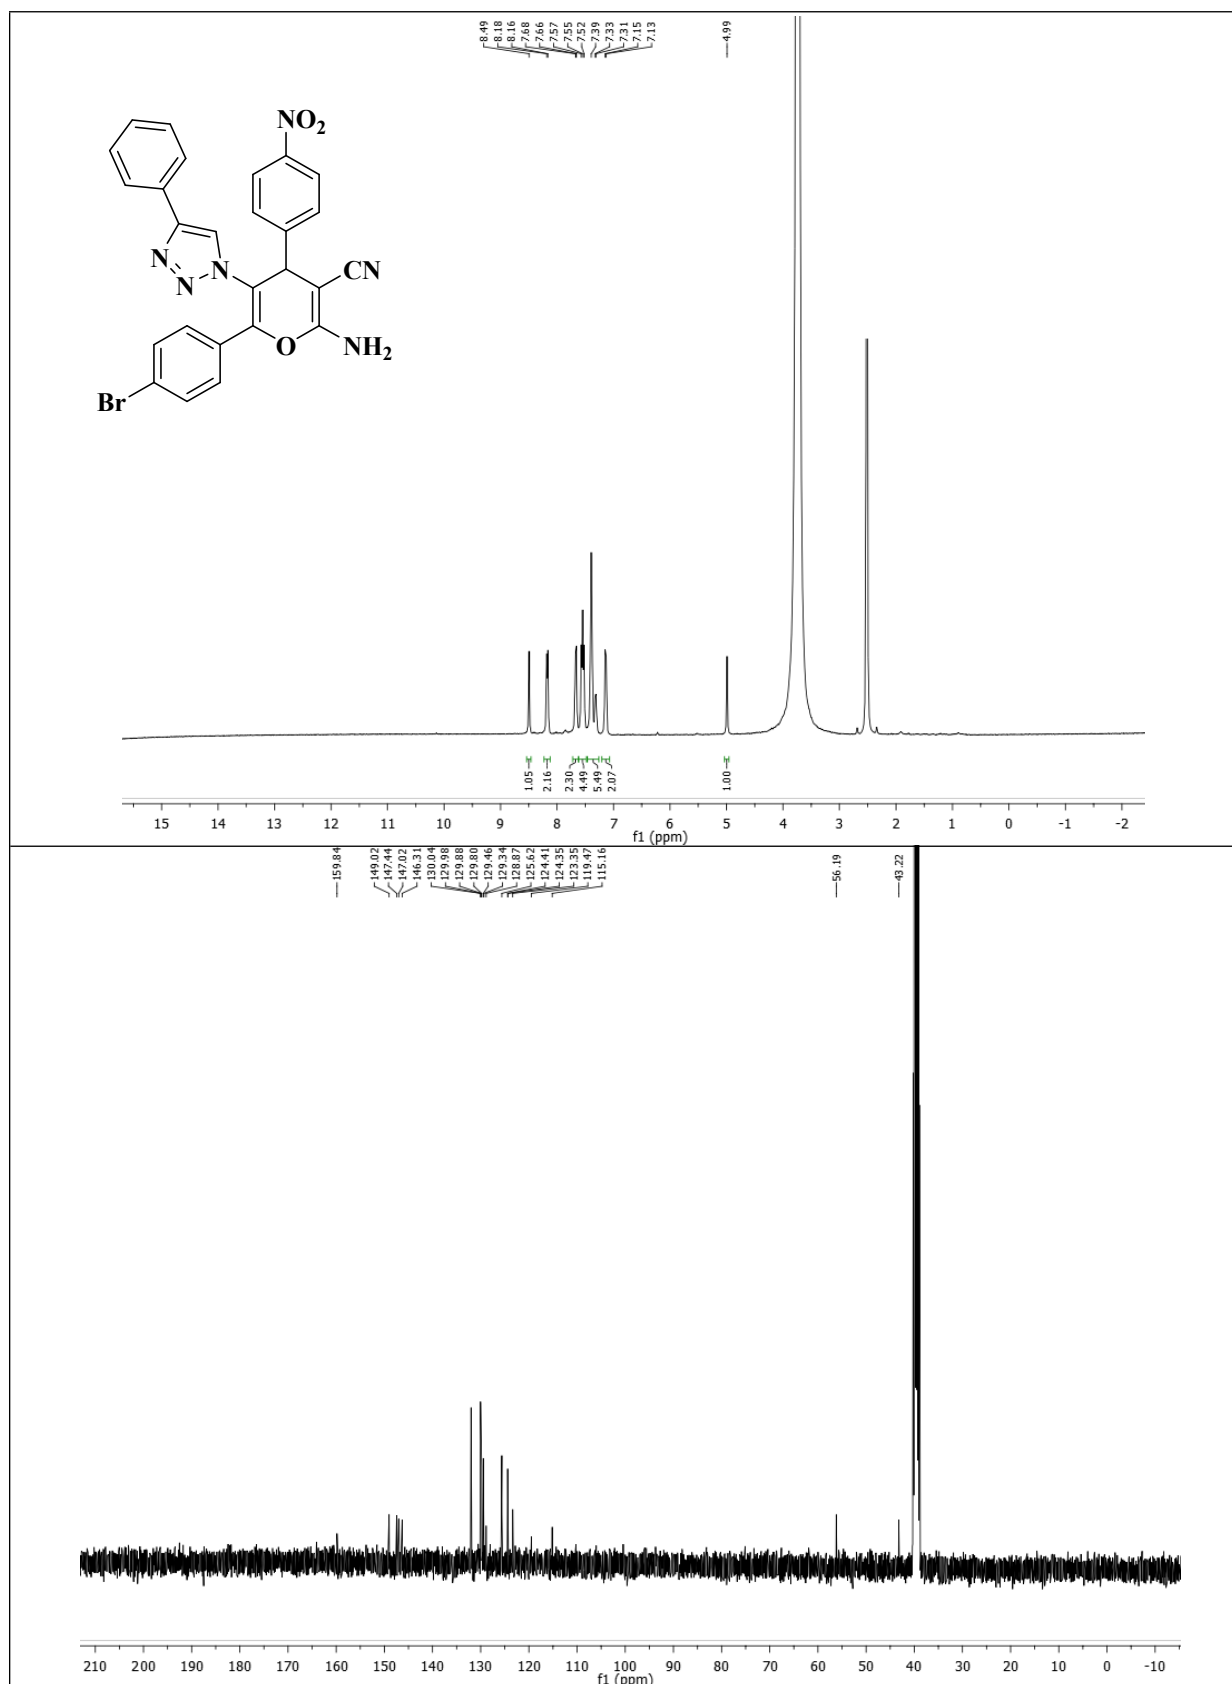

# <sup>1</sup>H and <sup>13</sup>C NMR Spectra of Compound 7h

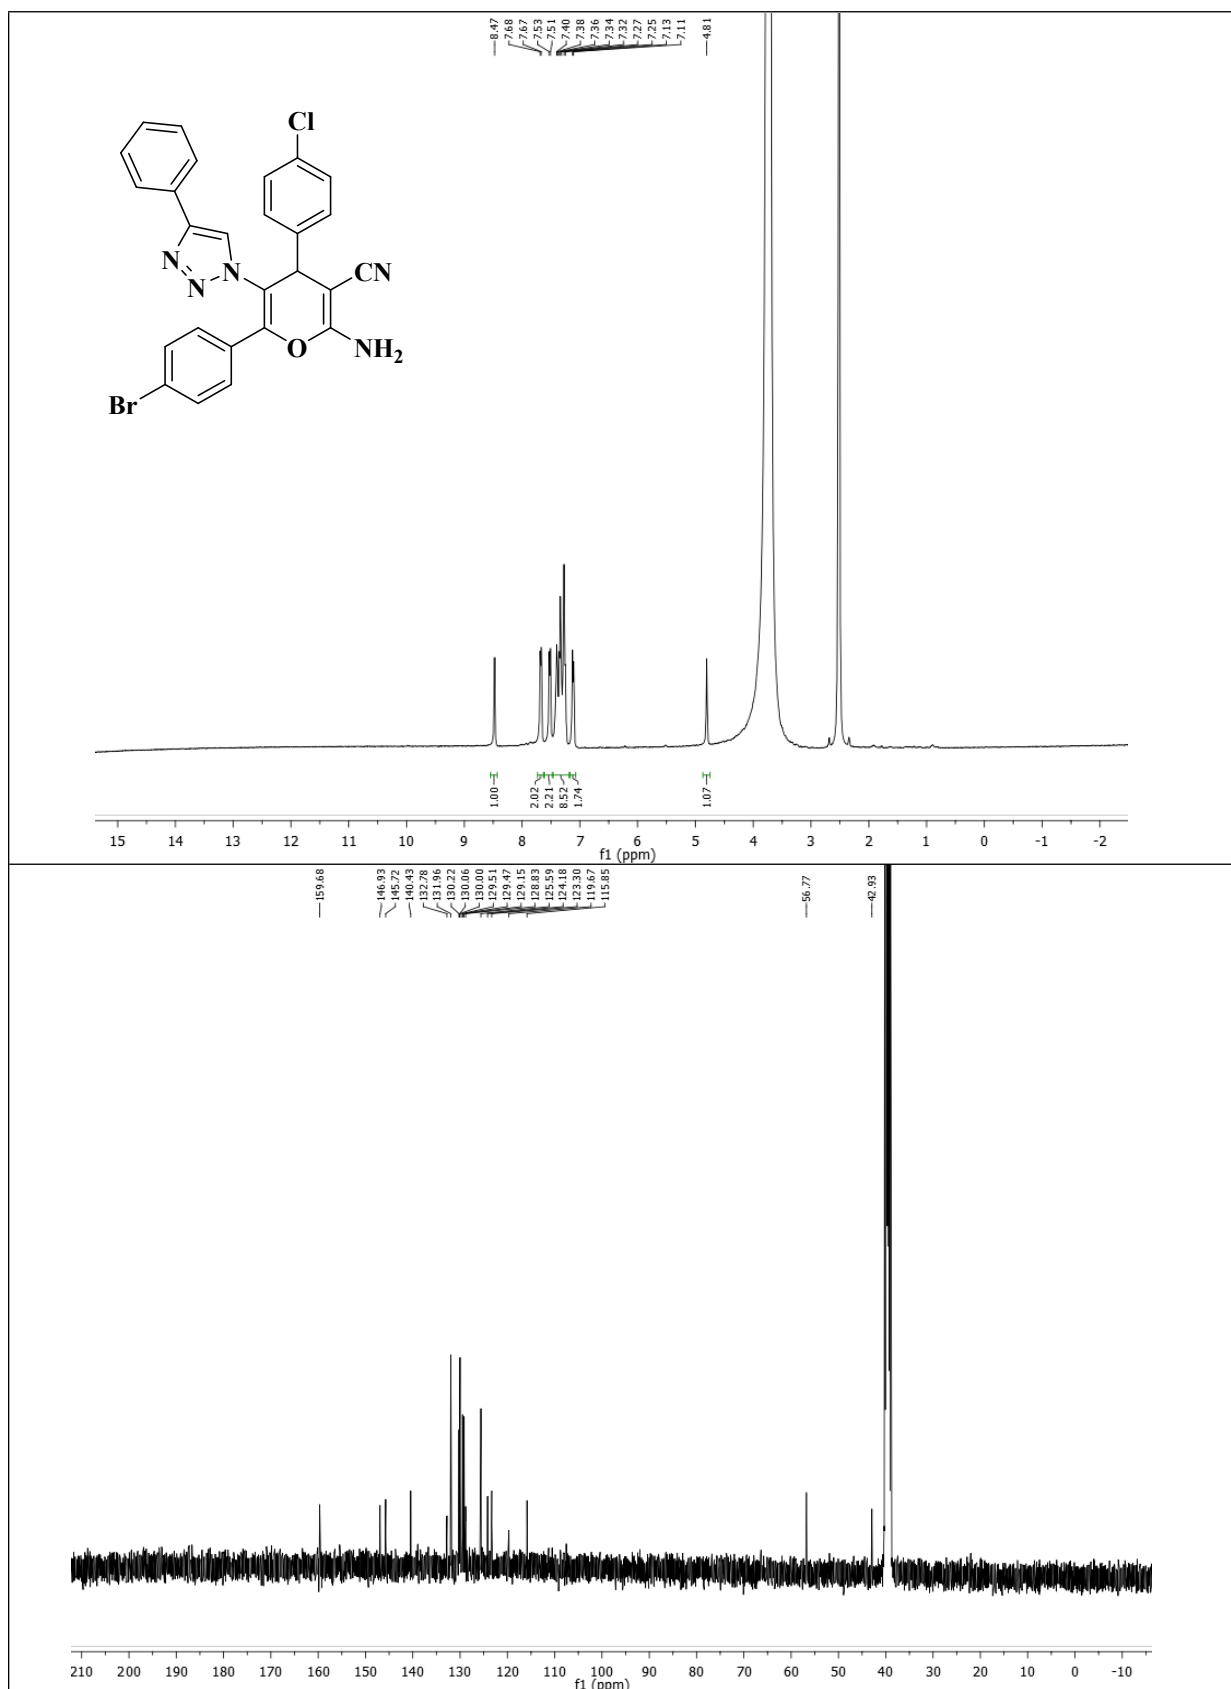

# $^1\text{H}$ and $^{13}\text{C}$ NMR Spectra of Compound 7i

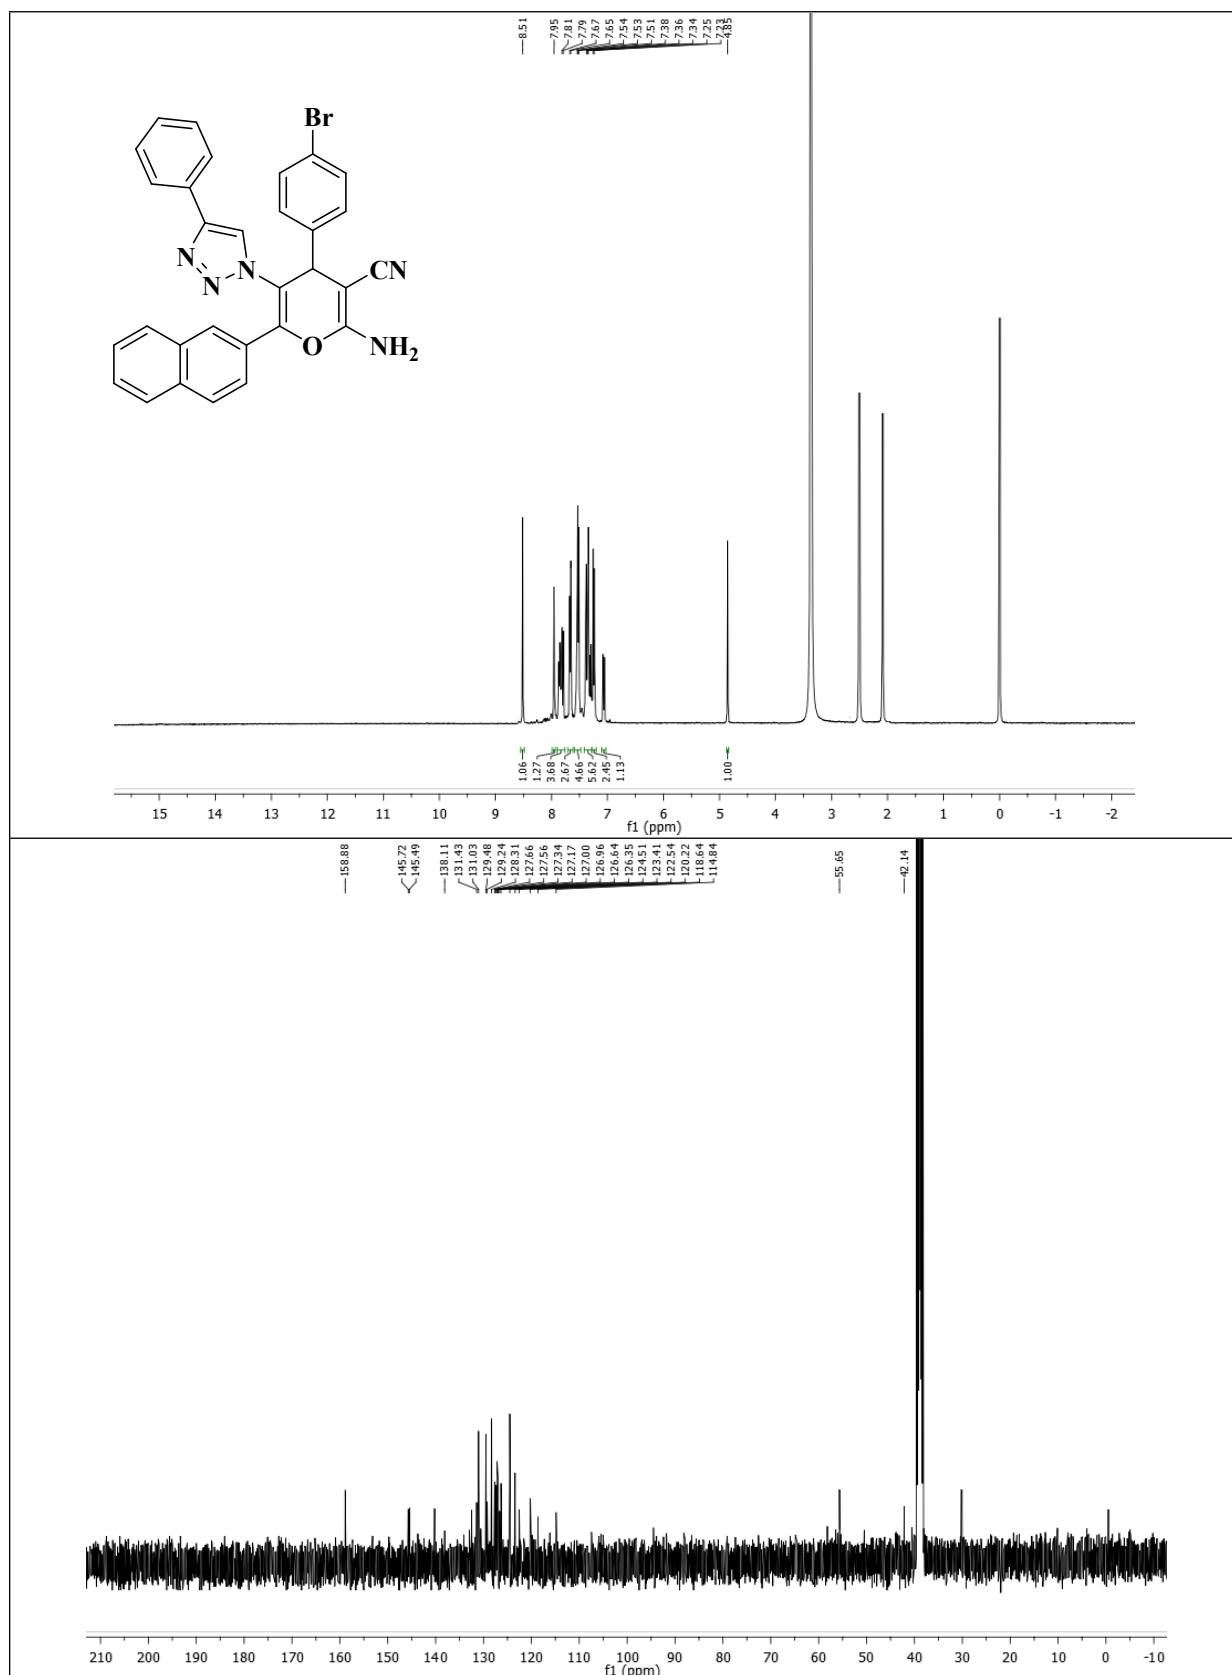

# <sup>1</sup>H and <sup>13</sup>C NMR Spectra of Compound 7j

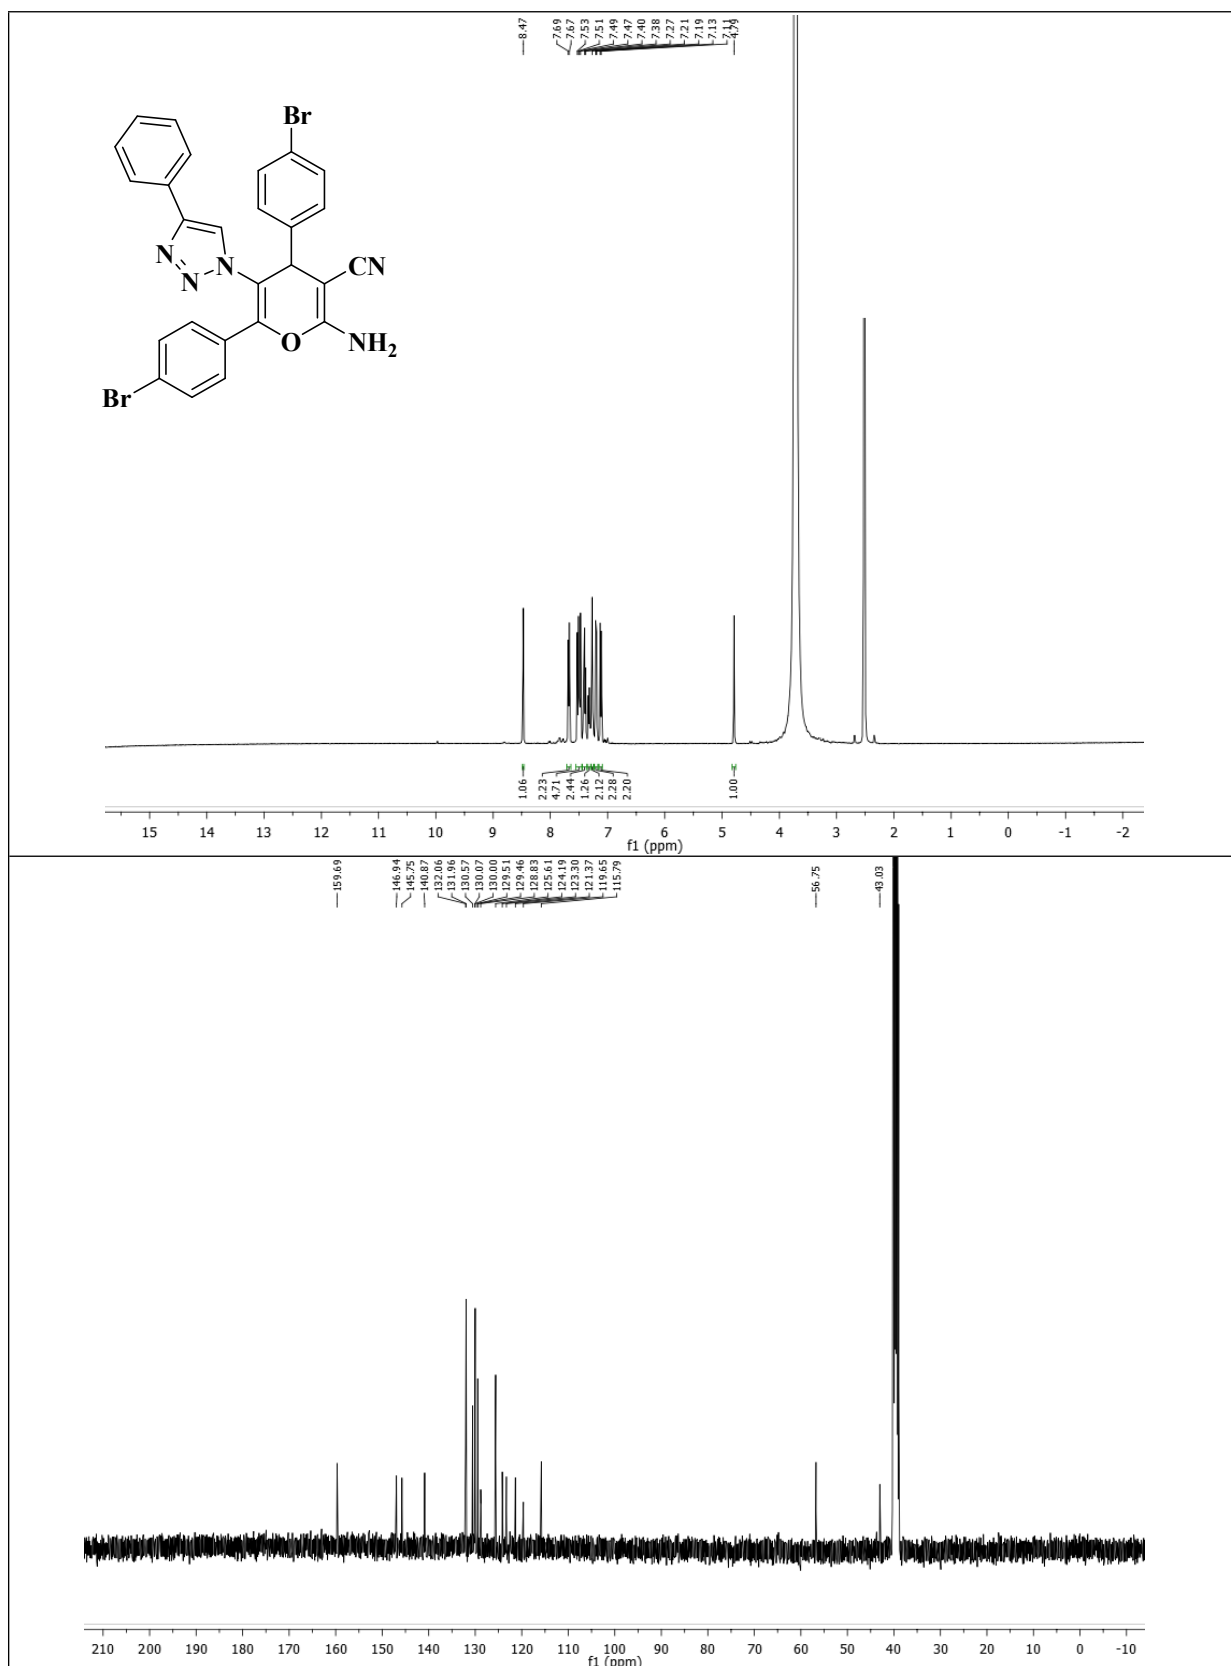

Supplement: c4ra01524j1.pdf [file c4ra01524j1.pdf]
